# Supplementary material for: Stroke Prevalence in a Coastal Town on the Black Sea Coast in Turkey: Community Based Study
Source: Hindawi journal article supplement (doi:10.1155/2018/8246123), 2018-07-02
Supplement: f1 [file 8246123.f1.pdf]

| yas   | cinsiyet | tansiyon | diabet | kalp | kolesterol | sigara | sigmiktar | birakyl |
|-------|----------|----------|--------|------|------------|--------|-----------|---------|
| 63,00 | 2,00     | 1,00     | 2,00   | 2,00 | 1,00       | 2,00   | #NULL!    | #NULL!  |
| 66,00 | 1,00     | 2,00     | 2,00   | 2,00 | 2,00       | 2,00   | #NULL!    | #NULL!  |
| 58,00 | 1,00     | 2,00     | 2,00   | 1,00 | 1,00       | 1,00   | 47,00     | #NULL!  |
| 56,00 | 2,00     | 2,00     | 2,00   | 2,00 | 1,00       | 2,00   | #NULL!    | #NULL!  |
| 46,00 | 2,00     | 2,00     | 2,00   | 2,00 | 2,00       | 2,00   | #NULL!    | #NULL!  |
| 52,00 | 2,00     | 2,00     | 2,00   | 1,00 | 1,00       | 2,00   | #NULL!    | #NULL!  |
| 57,00 | 2,00     | 1,00     | 2,00   | 2,00 | 2,00       | 2,00   | #NULL!    | #NULL!  |
| 62,00 | 1,00     | 2,00     | 2,00   | 1,00 | 2,00       | 1,00   | 42,00     | #NULL!  |
| 48,00 | 1,00     | 2,00     | 2,00   | 2,00 | 2,00       | 2,00   | #NULL!    | #NULL!  |
| 65,00 | 1,00     | 1,00     | 1,00   | 2,00 | 1,00       | 2,00   | #NULL!    | #NULL!  |
| 71,00 | 2,00     | 1,00     | 2,00   | 1,00 | 1,00       | 2,00   | #NULL!    | #NULL!  |
| 49,00 | 2,00     | 2,00     | 2,00   | 2,00 | 2,00       | 2,00   | #NULL!    | #NULL!  |
| 51,00 | 2,00     | 1,00     | 1,00   | 1,00 | 2,00       | 1,00   | 15,00     | #NULL!  |
| 66,00 | 2,00     | 1,00     | 1,00   | 2,00 | 2,00       | 1,00   | 15,00     | #NULL!  |
| 65,00 | 2,00     | 2,00     | 2,00   | 2,00 | 1,00       | 2,00   | #NULL!    | #NULL!  |
| 65,00 | 2,00     | 1,00     | 1,00   | 2,00 | 2,00       | 2,00   | #NULL!    | #NULL!  |
| 46,00 | 2,00     | 2,00     | 2,00   | 2,00 | 2,00       | 2,00   | #NULL!    | #NULL!  |
| 45,00 | 2,00     | 2,00     | 2,00   | 2,00 | 2,00       | 1,00   | 7,00      | #NULL!  |
| 56,00 | 2,00     | 2,00     | 1,00   | 2,00 | 1,00       | 2,00   | #NULL!    | #NULL!  |
| 59,00 | 1,00     | 2,00     | 2,00   | 2,00 | 2,00       | 2,00   | #NULL!    | #NULL!  |
| 74,00 | 2,00     | 1,00     | 1,00   | 2,00 | 2,00       | 2,00   | #NULL!    | #NULL!  |
| 49,00 | 2,00     | 2,00     | 2,00   | 2,00 | 2,00       | 1,00   | 10,00     | #NULL!  |
| 56,00 | 2,00     | 1,00     | 1,00   | 2,00 | 1,00       | 2,00   | 2,00      | #NULL!  |
| 75,00 | 1,00     | 1,00     | 1,00   | 2,00 | 1,00       | 2,00   | #NULL!    | #NULL!  |
| 51,00 | 2,00     | 1,00     | 2,00   | 2,00 | 2,00       | 1,00   | 30,00     | #NULL!  |
| 52,00 | 1,00     | 1,00     | 2,00   | 2,00 | 2,00       | 1,00   | 30,00     | #NULL!  |
| 49,00 | 2,00     | 2,00     | 2,00   | 2,00 | 2,00       | 2,00   | #NULL!    | #NULL!  |
| 50,00 | 1,00     | 1,00     | 2,00   | 2,00 | 2,00       | 1,00   | 25,00     | #NULL!  |
| 53,00 | 2,00     | 2,00     | 2,00   | 2,00 | 2,00       | 1,00   | 10,00     | #NULL!  |
| 54,00 | 2,00     | 2,00     | 2,00   | 2,00 | 2,00       | 2,00   | #NULL!    | #NULL!  |
| 50,00 | 2,00     | 1,00     | 1,00   | 1,00 | 2,00       | 2,00   | #NULL!    | #NULL!  |
| 50,00 | 2,00     | 2,00     | 2,00   | 2,00 | 2,00       | 2,00   | #NULL!    | #NULL!  |
| 46,00 | 2,00     | 1,00     | 1,00   | 2,00 | 1,00       | 2,00   | #NULL!    | #NULL!  |
| 48,00 | 1,00     | 2,00     | 2,00   | 2,00 | 2,00       | 2,00   | #NULL!    | #NULL!  |
| 47,00 | 1,00     | 2,00     | 2,00   | 2,00 | 2,00       | 2,00   | #NULL!    | #NULL!  |
| 52,00 | 1,00     | 2,00     | 2,00   | 2,00 | 2,00       | 2,00   | #NULL!    | #NULL!  |
| 69,00 | 1,00     | 1,00     | 1,00   | 2,00 | 2,00       | 2,00   | #NULL!    | #NULL!  |
| 60,00 | 2,00     | 1,00     | 2,00   | 2,00 | 2,00       | 2,00   | #NULL!    | #NULL!  |
| 69,00 | 2,00     | 1,00     | 2,00   | 1,00 | 1,00       | 2,00   | #NULL!    | #NULL!  |
| 55,00 | 1,00     | 2,00     | 2,00   | 2,00 | 1,00       | 2,00   | #NULL!    | #NULL!  |
| 60,00 | 2,00     | 1,00     | 1,00   | 2,00 | 1,00       | 2,00   | #NULL!    | #NULL!  |
| 63,00 | 1,00     | 1,00     | 2,00   | 2,00 | 2,00       | 1,00   | 20,00     | #NULL!  |
| 48,00 | 2,00     | 1,00     | 1,00   | 2,00 | 1,00       | 2,00   | #NULL!    | #NULL!  |
| 84,00 | 2,00     | 1,00     | 1,00   | 1,00 | 2,00       | 2,00   | #NULL!    | #NULL!  |
| 68,00 | 2,00     | 1,00     | 2,00   | 2,00 | 2,00       | 2,00   | #NULL!    | #NULL!  |
| 68,00 | 2,00     | 2,00     | 2,00   | 2,00 | 1,00       | 2,00   | #NULL!    | #NULL!  |
| 70,00 | 2,00     | 1,00     | 1,00   | 1,00 | 1,00       | 2,00   | #NULL!    | #NULL!  |
| 65,00 | 2,00     | 1,00     | 2,00   | 2,00 | 1,00       | 2,00   | #NULL!    | #NULL!  |
| 64,00 | 1,00     | 1,00     | 2,00   | 2,00 | 2,00       | 1,00   | 30,00     | #NULL!  |

|       |      |      |      |      |      |      |        |        |
|-------|------|------|------|------|------|------|--------|--------|
| 61,00 | 2,00 | 2,00 | 2,00 | 2,00 | 2,00 | 2,00 | #NULL! | #NULL! |
| 56,00 | 1,00 | 1,00 | 2,00 | 2,00 | 2,00 | 2,00 | #NULL! | #NULL! |
| 53,00 | 1,00 | 2,00 | 2,00 | 2,00 | 2,00 | 2,00 | #NULL! | #NULL! |
| 53,00 | 2,00 | 1,00 | 2,00 | 2,00 | 2,00 | 2,00 | #NULL! | #NULL! |
| 54,00 | 1,00 | 2,00 | 2,00 | 2,00 | 2,00 | 2,00 | #NULL! | #NULL! |
| 63,00 | 2,00 | 1,00 | 2,00 | 2,00 | 2,00 | 2,00 | #NULL! | #NULL! |
| 54,00 | 2,00 | 2,00 | 2,00 | 2,00 | 2,00 | 2,00 | #NULL! | #NULL! |
| 75,00 | 1,00 | 2,00 | 2,00 | 2,00 | 1,00 | 1,00 | 50,00  | #NULL! |
| 50,00 | 2,00 | 1,00 | 2,00 | 2,00 | 2,00 | 2,00 | #NULL! | #NULL! |
| 75,00 | 2,00 | 1,00 | 1,00 | 1,00 | 1,00 | 1,00 | 2,00   | #NULL! |
| 53,00 | 1,00 | 1,00 | 1,00 | 2,00 | 1,00 | 2,00 | #NULL! | #NULL! |
| 54,00 | 1,00 | 1,00 | 1,00 | 2,00 | 2,00 | 2,00 | #NULL! | #NULL! |
| 63,00 | 1,00 | 1,00 | 1,00 | 2,00 | 2,00 | 2,00 | #NULL! | #NULL! |
| 53,00 | 2,00 | 1,00 | 1,00 | 2,00 | 1,00 | 2,00 | #NULL! | #NULL! |
| 59,00 | 1,00 | 1,00 | 1,00 | 2,00 | 1,00 | 2,00 | #NULL! | #NULL! |
| 59,00 | 1,00 | 1,00 | 2,00 | 2,00 | 2,00 | 2,00 | #NULL! | #NULL! |
| 67,00 | 1,00 | 1,00 | 2,00 | 2,00 | 1,00 | 1,00 | 40,00  | #NULL! |
| 68,00 | 1,00 | 1,00 | 1,00 | 2,00 | 2,00 | 2,00 | #NULL! | #NULL! |
| 46,00 | 1,00 | 2,00 | 2,00 | 2,00 | 2,00 | 1,00 | 15,00  | #NULL! |
| 53,00 | 1,00 | 1,00 | 2,00 | 2,00 | 2,00 | 1,00 | 18,00  | #NULL! |
| 47,00 | 1,00 | 2,00 | 2,00 | 2,00 | 2,00 | 2,00 | #NULL! | #NULL! |
| 48,00 | 2,00 | 2,00 | 2,00 | 2,00 | 2,00 | 2,00 | #NULL! | #NULL! |
| 52,00 | 2,00 | 1,00 | 2,00 | 2,00 | 2,00 | 1,00 | 40,00  | #NULL! |
| 60,00 | 2,00 | 1,00 | 2,00 | 2,00 | 2,00 | 2,00 | #NULL! | #NULL! |
| 48,00 | 1,00 | 1,00 | 2,00 | 2,00 | 1,00 | 1,00 | 20,00  | #NULL! |
| 61,00 | 1,00 | 1,00 | 2,00 | 1,00 | 1,00 | 2,00 | #NULL! | #NULL! |
| 56,00 | 1,00 | 2,00 | 2,00 | 2,00 | 2,00 | 1,00 | 32,00  | #NULL! |
| 65,00 | 1,00 | 2,00 | 1,00 | 2,00 | 2,00 | 2,00 | #NULL! | #NULL! |
| 60,00 | 1,00 | 2,00 | 2,00 | 2,00 | 2,00 | 2,00 | #NULL! | #NULL! |
| 76,00 | 1,00 | 1,00 | 2,00 | 2,00 | 2,00 | 2,00 | #NULL! | #NULL! |
| 67,00 | 2,00 | 1,00 | 1,00 | 2,00 | 1,00 | 2,00 | #NULL! | #NULL! |
| 57,00 | 2,00 | 1,00 | 1,00 | 1,00 | 1,00 | 2,00 | #NULL! | #NULL! |
| 53,00 | 1,00 | 2,00 | 2,00 | 2,00 | 2,00 | 1,00 | 26,00  | #NULL! |
| 48,00 | 2,00 | 2,00 | 2,00 | 2,00 | 2,00 | 2,00 | #NULL! | #NULL! |
| 58,00 | 1,00 | 1,00 | 1,00 | 2,00 | 2,00 | 2,00 | #NULL! | #NULL! |
| 56,00 | 2,00 | 1,00 | 2,00 | 2,00 | 2,00 | 2,00 | #NULL! | #NULL! |
| 52,00 | 1,00 | 1,00 | 1,00 | 2,00 | 2,00 | 2,00 | #NULL! | #NULL! |
| 46,00 | 1,00 | 2,00 | 2,00 | 2,00 | 2,00 | 2,00 | #NULL! | #NULL! |
| 67,00 | 1,00 | 1,00 | 1,00 | 1,00 | 1,00 | 2,00 | #NULL! | #NULL! |
| 68,00 | 1,00 | 1,00 | 2,00 | 2,00 | 1,00 | 2,00 | #NULL! | #NULL! |
| 46,00 | 1,00 | 1,00 | 2,00 | 2,00 | 2,00 | 2,00 | #NULL! | #NULL! |
| 77,00 | 1,00 | 2,00 | 1,00 | 2,00 | 2,00 | 2,00 | #NULL! | #NULL! |
| 58,00 | 1,00 | 1,00 | 2,00 | 2,00 | 2,00 | 2,00 | #NULL! | #NULL! |
| 48,00 | 1,00 | 2,00 | 2,00 | 2,00 | 2,00 | 2,00 | #NULL! | #NULL! |
| 53,00 | 2,00 | 2,00 | 2,00 | 2,00 | 2,00 | 1,00 | 10,00  | #NULL! |
| 51,00 | 1,00 | 2,00 | 2,00 | 2,00 | 2,00 | 1,00 | 25,00  | #NULL! |
| 70,00 | 1,00 | 1,00 | 1,00 | 1,00 | 1,00 | 2,00 | #NULL! | #NULL! |
| 67,00 | 2,00 | 2,00 | 1,00 | 2,00 | 2,00 | 2,00 | #NULL! | #NULL! |
| 57,00 | 2,00 | 1,00 | 2,00 | 2,00 | 2,00 | 2,00 | #NULL! | #NULL! |
| 65,00 | 2,00 | 1,00 | 2,00 | 2,00 | 1,00 | 2,00 | #NULL! | #NULL! |

|       |      |      |      |      |      |      |        |        |
|-------|------|------|------|------|------|------|--------|--------|
| 51,00 | 2,00 | 1,00 | 2,00 | 2,00 | 1,00 | 2,00 | #NULL! | #NULL! |
| 52,00 | 2,00 | 1,00 | 2,00 | 2,00 | 1,00 | 2,00 | #NULL! | #NULL! |
| 60,00 | 2,00 | 2,00 | 2,00 | 2,00 | 2,00 | 2,00 | #NULL! | #NULL! |
| 61,00 | 2,00 | 2,00 | 1,00 | 2,00 | 2,00 | 2,00 | #NULL! | #NULL! |
| 78,00 | 2,00 | 1,00 | 2,00 | 2,00 | 2,00 | 2,00 | #NULL! | #NULL! |
| 50,00 | 2,00 | 2,00 | 2,00 | 2,00 | 2,00 | 2,00 | #NULL! | #NULL! |
| 58,00 | 1,00 | 1,00 | 2,00 | 2,00 | 2,00 | 1,00 | 30,00  | #NULL! |
| 58,00 | 1,00 | 2,00 | 1,00 | 2,00 | 2,00 | 1,00 | 20,00  | #NULL! |
| 56,00 | 2,00 | 1,00 | 1,00 | 1,00 | 2,00 | 1,00 | 10,00  | #NULL! |
| 65,00 | 1,00 | 1,00 | 2,00 | 1,00 | 1,00 | 2,00 | #NULL! | #NULL! |
| 63,00 | 1,00 | 1,00 | 2,00 | 2,00 | 2,00 | 2,00 | #NULL! | #NULL! |
| 65,00 | 1,00 | 1,00 | 1,00 | 2,00 | 2,00 | 1,00 | 40,00  | #NULL! |
| 50,00 | 1,00 | 1,00 | 1,00 | 2,00 | 2,00 | 2,00 | #NULL! | #NULL! |
| 73,00 | 2,00 | 2,00 | 2,00 | 2,00 | 2,00 | 2,00 | #NULL! | #NULL! |
| 80,00 | 1,00 | 2,00 | 2,00 | 2,00 | 2,00 | 2,00 | #NULL! | #NULL! |
| 75,00 | 2,00 | 1,00 | 2,00 | 1,00 | 1,00 | 2,00 | #NULL! | #NULL! |
| 62,00 | 1,00 | 1,00 | 2,00 | 2,00 | 2,00 | 2,00 | #NULL! | #NULL! |
| 54,00 | 2,00 | 2,00 | 2,00 | 2,00 | 2,00 | 1,00 | 20,00  | #NULL! |
| 53,00 | 1,00 | 2,00 | 2,00 | 2,00 | 1,00 | 2,00 | #NULL! | #NULL! |
| 59,00 | 2,00 | 1,00 | 1,00 | 2,00 | 2,00 | 2,00 | #NULL! | #NULL! |
| 70,00 | 1,00 | 1,00 | 1,00 | 2,00 | 2,00 | 2,00 | #NULL! | #NULL! |
| 56,00 | 1,00 | 2,00 | 2,00 | 2,00 | 2,00 | 2,00 | #NULL! | #NULL! |
| 49,00 | 2,00 | 1,00 | 2,00 | 2,00 | 2,00 | 2,00 | #NULL! | #NULL! |
| 68,00 | 2,00 | 1,00 | 1,00 | 2,00 | 2,00 | 2,00 | #NULL! | #NULL! |
| 76,00 | 1,00 | 1,00 | 1,00 | 1,00 | 2,00 | 2,00 | #NULL! | #NULL! |
| 55,00 | 2,00 | 2,00 | 2,00 | 2,00 | 2,00 | 2,00 | #NULL! | #NULL! |
| 54,00 | 1,00 | 2,00 | 2,00 | 2,00 | 2,00 | 2,00 | #NULL! | #NULL! |
| 65,00 | 1,00 | 1,00 | 2,00 | 2,00 | 2,00 | 1,00 | 40,00  | #NULL! |
| 85,00 | 2,00 | 2,00 | 2,00 | 2,00 | 2,00 | 2,00 | #NULL! | #NULL! |
| 45,00 | 2,00 | 2,00 | 2,00 | 2,00 | 2,00 | 1,00 | 13,00  | #NULL! |
| 49,00 | 1,00 | 2,00 | 2,00 | 2,00 | 2,00 | 1,00 | 20,00  | #NULL! |
| 47,00 | 2,00 | 2,00 | 2,00 | 2,00 | 2,00 | 1,00 | 10,00  | #NULL! |
| 52,00 | 1,00 | 1,00 | 2,00 | 2,00 | 1,00 | 2,00 | #NULL! | #NULL! |
| 66,00 | 1,00 | 1,00 | 2,00 | 1,00 | 2,00 | 1,00 | 25,00  | #NULL! |
| 61,00 | 2,00 | 1,00 | 2,00 | 2,00 | 2,00 | 2,00 | #NULL! | #NULL! |
| 52,00 | 2,00 | 1,00 | 2,00 | 2,00 | 1,00 | 2,00 | #NULL! | #NULL! |
| 52,00 | 1,00 | 2,00 | 2,00 | 2,00 | 2,00 | 2,00 | #NULL! | #NULL! |
| 48,00 | 2,00 | 2,00 | 2,00 | 2,00 | 2,00 | 2,00 | #NULL! | #NULL! |
| 54,00 | 1,00 | 2,00 | 2,00 | 2,00 | 2,00 | 2,00 | #NULL! | #NULL! |
| 58,00 | 2,00 | 2,00 | 2,00 | 2,00 | 2,00 | 2,00 | #NULL! | #NULL! |
| 59,00 | 2,00 | 2,00 | 2,00 | 2,00 | 2,00 | 2,00 | #NULL! | #NULL! |
| 82,00 | 1,00 | 1,00 | 2,00 | 2,00 | 2,00 | 2,00 | #NULL! | #NULL! |
| 69,00 | 1,00 | 2,00 | 1,00 | 1,00 | 2,00 | 2,00 | #NULL! | #NULL! |
| 52,00 | 1,00 | 2,00 | 2,00 | 2,00 | 2,00 | 2,00 | #NULL! | #NULL! |
| 57,00 | 2,00 | 2,00 | 2,00 | 2,00 | 2,00 | 2,00 | #NULL! | #NULL! |
| 62,00 | 1,00 | 1,00 | 2,00 | 2,00 | 2,00 | 2,00 | #NULL! | #NULL! |
| 50,00 | 2,00 | 1,00 | 2,00 | 2,00 | 2,00 | 2,00 | #NULL! | #NULL! |
| 55,00 | 1,00 | 2,00 | 2,00 | 2,00 | 2,00 | 2,00 | #NULL! | #NULL! |
| 57,00 | 1,00 | 1,00 | 1,00 | 2,00 | 2,00 | 2,00 | #NULL! | #NULL! |
| 55,00 | 2,00 | 2,00 | 2,00 | 2,00 | 2,00 | 2,00 | #NULL! | #NULL! |

|       |      |      |      |      |      |      |        |        |
|-------|------|------|------|------|------|------|--------|--------|
| 77,00 | 2,00 | 1,00 | 2,00 | 2,00 | 2,00 | 1,00 | 67,00  | #NULL! |
| 61,00 | 1,00 | 2,00 | 2,00 | 2,00 | 1,00 | 2,00 | #NULL! | #NULL! |
| 47,00 | 1,00 | 2,00 | 2,00 | 2,00 | 2,00 | 2,00 | #NULL! | #NULL! |
| 50,00 | 2,00 | 2,00 | 2,00 | 2,00 | 1,00 | 2,00 | #NULL! | #NULL! |
| 62,00 | 1,00 | 2,00 | 2,00 | 1,00 | 1,00 | 2,00 | #NULL! | #NULL! |
| 84,00 | 2,00 | 1,00 | 2,00 | 1,00 | 1,00 | 2,00 | #NULL! | #NULL! |
| 52,00 | 2,00 | 2,00 | 2,00 | 2,00 | 2,00 | 2,00 | #NULL! | #NULL! |
| 45,00 | 2,00 | 1,00 | 1,00 | 2,00 | 2,00 | 2,00 | #NULL! | #NULL! |
| 48,00 | 2,00 | 2,00 | 2,00 | 2,00 | 2,00 | 2,00 | #NULL! | #NULL! |
| 59,00 | 2,00 | 1,00 | 2,00 | 1,00 | 2,00 | 2,00 | #NULL! | #NULL! |
| 52,00 | 1,00 | 1,00 | 2,00 | 2,00 | 2,00 | 2,00 | #NULL! | #NULL! |
| 48,00 | 2,00 | 2,00 | 2,00 | 2,00 | 2,00 | 2,00 | #NULL! | #NULL! |
| 64,00 | 1,00 | 1,00 | 2,00 | 1,00 | 2,00 | 2,00 | #NULL! | #NULL! |
| 48,00 | 1,00 | 2,00 | 2,00 | 2,00 | 2,00 | 2,00 | #NULL! | #NULL! |
| 66,00 | 1,00 | 2,00 | 2,00 | 2,00 | 2,00 | 2,00 | 29,00  | 10,00  |
| 56,00 | 2,00 | 1,00 | 2,00 | 2,00 | 2,00 | 2,00 | #NULL! | #NULL! |
| 60,00 | 1,00 | 1,00 | 1,00 | 2,00 | 2,00 | 2,00 | #NULL! | #NULL! |
| 60,00 | 2,00 | 1,00 | 2,00 | 2,00 | 2,00 | 2,00 | #NULL! | #NULL! |
| 50,00 | 2,00 | 2,00 | 2,00 | 2,00 | 2,00 | 1,00 | 10,00  | #NULL! |
| 52,00 | 1,00 | 2,00 | 2,00 | 2,00 | 2,00 | 1,00 | 15,00  | #NULL! |
| 75,00 | 1,00 | 2,00 | 1,00 | 1,00 | 2,00 | 2,00 | #NULL! | #NULL! |
| 57,00 | 2,00 | 2,00 | 2,00 | 2,00 | 2,00 | 2,00 | #NULL! | #NULL! |
| 80,00 | 2,00 | 1,00 | 2,00 | 2,00 | 2,00 | 2,00 | #NULL! | #NULL! |
| 90,00 | 1,00 | 1,00 | 1,00 | 1,00 | 1,00 | 2,00 | #NULL! | #NULL! |
| 40,00 | 2,00 | 2,00 | 2,00 | 2,00 | 2,00 | 2,00 | #NULL! | #NULL! |
| 54,00 | 1,00 | 1,00 | 2,00 | 2,00 | 2,00 | 1,00 | 24,00  | #NULL! |
| 81,00 | 1,00 | 2,00 | 2,00 | 2,00 | 2,00 | 2,00 | 25,00  | 21,00  |
| 80,00 | 2,00 | 2,00 | 2,00 | 2,00 | 2,00 | 2,00 | #NULL! | #NULL! |
| 64,00 | 1,00 | 2,00 | 2,00 | 1,00 | 2,00 | 1,00 | 34,00  | #NULL! |
| 67,00 | 1,00 | 2,00 | 2,00 | 1,00 | 1,00 | 2,00 | #NULL! | #NULL! |
| 53,00 | 1,00 | 1,00 | 1,00 | 2,00 | 2,00 | 1,00 | 35,00  | #NULL! |
| 84,00 | 2,00 | 1,00 | 1,00 | 2,00 | 2,00 | 2,00 | #NULL! | #NULL! |
| 58,00 | 2,00 | 1,00 | 1,00 | 2,00 | 2,00 | 1,00 | #NULL! | #NULL! |
| 53,00 | 2,00 | 1,00 | 2,00 | 1,00 | 2,00 | 1,00 | 20,00  | #NULL! |
| 60,00 | 1,00 | 1,00 | 2,00 | 1,00 | 2,00 | 1,00 | 40,00  | #NULL! |
| 61,00 | 1,00 | 2,00 | 2,00 | 2,00 | 2,00 | 1,00 | 15,00  | #NULL! |
| 48,00 | 2,00 | 1,00 | 2,00 | 2,00 | 2,00 | 2,00 | #NULL! | #NULL! |
| 61,00 | 1,00 | 1,00 | 1,00 | 2,00 | 1,00 | 1,00 | 47,00  | #NULL! |
| 45,00 | 1,00 | 2,00 | 2,00 | 2,00 | 2,00 | 2,00 | #NULL! | #NULL! |
| 56,00 | 2,00 | 1,00 | 1,00 | 1,00 | 1,00 | 2,00 | #NULL! | #NULL! |
| 65,00 | 2,00 | 2,00 | 1,00 | 2,00 | 2,00 | 2,00 | #NULL! | #NULL! |
| 67,00 | 1,00 | 2,00 | 1,00 | 1,00 | 1,00 | 2,00 | #NULL! | #NULL! |
| 78,00 | 2,00 | 2,00 | 2,00 | 2,00 | 2,00 | 2,00 | #NULL! | #NULL! |
| 51,00 | 1,00 | 2,00 | 2,00 | 2,00 | 2,00 | 2,00 | #NULL! | #NULL! |
| 53,00 | 2,00 | 2,00 | 2,00 | 2,00 | 2,00 | 2,00 | #NULL! | #NULL! |
| 46,00 | 1,00 | 2,00 | 2,00 | 2,00 | 2,00 | 2,00 | #NULL! | #NULL! |
| 46,00 | 2,00 | 2,00 | 2,00 | 2,00 | 2,00 | 2,00 | #NULL! | #NULL! |
| 51,00 | 2,00 | 2,00 | 2,00 | 2,00 | 2,00 | 1,00 | 10,00  | #NULL! |
| 56,00 | 1,00 | 2,00 | 2,00 | 2,00 | 2,00 | 2,00 | #NULL! | #NULL! |
| 47,00 | 2,00 | 2,00 | 2,00 | 2,00 | 2,00 | 2,00 | #NULL! | #NULL! |



|       |      |      |      |      |      |      |        |        |
|-------|------|------|------|------|------|------|--------|--------|
| 49,00 | 1,00 | 2,00 | 2,00 | 2,00 | 2,00 | 2,00 | #NULL! | #NULL! |
| 58,00 | 2,00 | 1,00 | 1,00 | 2,00 | 1,00 | 2,00 | #NULL! | #NULL! |
| 62,00 | 2,00 | 1,00 | 1,00 | 1,00 | 1,00 | 2,00 | #NULL! | #NULL! |
| 55,00 | 1,00 | 2,00 | 2,00 | 2,00 | 2,00 | 2,00 | #NULL! | #NULL! |
| 48,00 | 2,00 | 2,00 | 2,00 | 2,00 | 2,00 | 2,00 | #NULL! | #NULL! |
| 52,00 | 2,00 | 1,00 | 2,00 | 2,00 | 2,00 | 2,00 | #NULL! | #NULL! |
| 60,00 | 2,00 | 2,00 | 2,00 | 2,00 | 2,00 | 2,00 | #NULL! | #NULL! |
| 67,00 | 2,00 | 1,00 | 2,00 | 2,00 | 2,00 | 2,00 | #NULL! | #NULL! |
| 45,00 | 1,00 | 1,00 | 2,00 | 2,00 | 2,00 | 2,00 | #NULL! | #NULL! |
| 48,00 | 1,00 | 2,00 | 2,00 | 2,00 | 2,00 | 2,00 | 10,00  | 15,00  |
| 70,00 | 2,00 | 2,00 | 2,00 | 2,00 | 2,00 | 2,00 | #NULL! | #NULL! |
| 70,00 | 1,00 | 1,00 | 2,00 | 2,00 | 2,00 | 2,00 | #NULL! | #NULL! |
| 75,00 | 1,00 | 2,00 | 2,00 | 2,00 | 2,00 | 2,00 | #NULL! | #NULL! |
| 65,00 | 2,00 | 1,00 | 2,00 | 2,00 | 2,00 | 2,00 | #NULL! | #NULL! |
| 56,00 | 2,00 | 1,00 | 1,00 | 2,00 | 2,00 | 2,00 | #NULL! | #NULL! |
| 45,00 | 2,00 | 2,00 | 2,00 | 2,00 | 2,00 | 2,00 | #NULL! | #NULL! |
| 47,00 | 2,00 | 2,00 | 2,00 | 2,00 | 2,00 | 2,00 | #NULL! | #NULL! |
| 46,00 | 1,00 | 2,00 | 2,00 | 2,00 | 2,00 | 2,00 | #NULL! | #NULL! |
| 45,00 | 1,00 | 2,00 | 2,00 | 2,00 | 2,00 | 2,00 | #NULL! | #NULL! |
| 48,00 | 1,00 | 2,00 | 2,00 | 2,00 | 2,00 | 2,00 | #NULL! | #NULL! |
| 46,00 | 2,00 | 2,00 | 2,00 | 2,00 | 2,00 | 2,00 | #NULL! | #NULL! |
| 49,00 | 1,00 | 2,00 | 2,00 | 2,00 | 2,00 | 1,00 | 22,00  | #NULL! |
| 46,00 | 1,00 | 2,00 | 2,00 | 2,00 | 2,00 | 1,00 | 18,00  | #NULL! |
| 45,00 | 2,00 | 2,00 | 2,00 | 2,00 | 2,00 | 1,00 | 8,00   | #NULL! |
| 71,00 | 2,00 | 2,00 | 2,00 | 2,00 | 2,00 | 2,00 | #NULL! | #NULL! |
| 78,00 | 2,00 | 1,00 | 2,00 | 2,00 | 2,00 | 2,00 | #NULL! | #NULL! |
| 80,00 | 1,00 | 2,00 | 2,00 | 2,00 | 2,00 | 2,00 | #NULL! | #NULL! |
| 60,00 | 1,00 | 2,00 | 2,00 | 2,00 | 2,00 | 2,00 | #NULL! | #NULL! |
| 78,00 | 1,00 | 2,00 | 2,00 | 2,00 | 2,00 | 2,00 | #NULL! | #NULL! |
| 55,00 | 1,00 | 2,00 | 2,00 | 2,00 | 2,00 | 2,00 | #NULL! | #NULL! |
| 49,00 | 2,00 | 2,00 | 2,00 | 2,00 | 2,00 | 2,00 | #NULL! | #NULL! |
| 68,00 | 2,00 | 1,00 | 2,00 | 2,00 | 2,00 | 1,00 | 40,00  | #NULL! |
| 50,00 | 1,00 | 2,00 | 2,00 | 2,00 | 2,00 | 1,00 | 20,00  | #NULL! |
| 53,00 | 1,00 | 2,00 | 2,00 | 1,00 | 1,00 | 1,00 | 30,00  | #NULL! |
| 83,00 | 1,00 | 1,00 | 1,00 | 1,00 | 1,00 | 2,00 | #NULL! | #NULL! |
| 65,00 | 2,00 | 1,00 | 1,00 | 2,00 | 2,00 | 2,00 | #NULL! | #NULL! |
| 61,00 | 2,00 | 2,00 | 2,00 | 2,00 | 2,00 | 2,00 | #NULL! | #NULL! |
| 64,00 | 2,00 | 1,00 | 1,00 | 2,00 | 1,00 | 2,00 | #NULL! | #NULL! |
| 61,00 | 1,00 | 1,00 | 2,00 | 2,00 | 1,00 | 1,00 | 43,00  | #NULL! |
| 50,00 | 2,00 | 1,00 | 1,00 | 2,00 | 1,00 | 2,00 | #NULL! | #NULL! |
| 91,00 | 2,00 | 1,00 | 2,00 | 2,00 | 2,00 | 2,00 | #NULL! | #NULL! |
| 53,00 | 2,00 | 2,00 | 2,00 | 2,00 | 2,00 | 2,00 | #NULL! | #NULL! |
| 60,00 | 1,00 | 1,00 | 2,00 | 2,00 | 1,00 | 2,00 | #NULL! | #NULL! |
| 53,00 | 2,00 | 2,00 | 2,00 | 2,00 | 2,00 | 1,00 | 25,00  | #NULL! |
| 46,00 | 2,00 | 2,00 | 2,00 | 2,00 | 1,00 | 2,00 | #NULL! | #NULL! |
| 65,00 | 1,00 | 2,00 | 1,00 | 2,00 | 2,00 | 2,00 | #NULL! | #NULL! |
| 69,00 | 1,00 | 1,00 | 1,00 | 2,00 | 2,00 | 2,00 | #NULL! | #NULL! |
| 58,00 | 1,00 | 2,00 | 2,00 | 2,00 | 2,00 | 1,00 | 26,00  | #NULL! |
| 48,00 | 2,00 | 2,00 | 1,00 | 2,00 | 2,00 | 2,00 | #NULL! | #NULL! |
| 69,00 | 2,00 | 1,00 | 2,00 | 2,00 | 2,00 | 2,00 | #NULL! | #NULL! |











|       |      |      |      |      |      |      |        |        |
|-------|------|------|------|------|------|------|--------|--------|
| 45,00 | 2,00 | 2,00 | 2,00 | 2,00 | 2,00 | 2,00 | #NULL! | #NULL! |
| 45,00 | 2,00 | 2,00 | 2,00 | 2,00 | 2,00 | 1,00 | 20,00  | #NULL! |
| 55,00 | 2,00 | 2,00 | 2,00 | 2,00 | 2,00 | 1,00 | #NULL! | #NULL! |
| 53,00 | 1,00 | 2,00 | 2,00 | 2,00 | 2,00 | 1,00 | 40,00  | #NULL! |
| 45,00 | 2,00 | 1,00 | 2,00 | 2,00 | 2,00 | 2,00 | #NULL! | #NULL! |
| 50,00 | 1,00 | 2,00 | 2,00 | 2,00 | 2,00 | 2,00 | #NULL! | #NULL! |
| 45,00 | 1,00 | 2,00 | 2,00 | 2,00 | 2,00 | 1,00 | 15,00  | #NULL! |
| 45,00 | 2,00 | 2,00 | 2,00 | 2,00 | 2,00 | 2,00 | #NULL! | #NULL! |
| 55,00 | 1,00 | 1,00 | 2,00 | 2,00 | 2,00 | 2,00 | #NULL! | #NULL! |
| 50,00 | 1,00 | 2,00 | 2,00 | 2,00 | 2,00 | 2,00 | #NULL! | #NULL! |
| 55,00 | 2,00 | 2,00 | 1,00 | 2,00 | 1,00 | 2,00 | #NULL! | #NULL! |
| 50,00 | 2,00 | 2,00 | 2,00 | 2,00 | 2,00 | 2,00 | #NULL! | #NULL! |
| 55,00 | 1,00 | 2,00 | 1,00 | 2,00 | 2,00 | 2,00 | #NULL! | #NULL! |
| 65,00 | 1,00 | 2,00 | 2,00 | 2,00 | 1,00 | 2,00 | #NULL! | #NULL! |
| 50,00 | 2,00 | 2,00 | 2,00 | 2,00 | 2,00 | 1,00 | 10,00  | #NULL! |
| 55,00 | 1,00 | 1,00 | 2,00 | 2,00 | 2,00 | 2,00 | #NULL! | #NULL! |
| 55,00 | 2,00 | 2,00 | 1,00 | 2,00 | 2,00 | 2,00 | #NULL! | #NULL! |
| 66,00 | 2,00 | 1,00 | 1,00 | 2,00 | 2,00 | 2,00 | #NULL! | #NULL! |
| 45,00 | 1,00 | 2,00 | 2,00 | 2,00 | 2,00 | 2,00 | #NULL! | #NULL! |
| 66,00 | 2,00 | 2,00 | 2,00 | 2,00 | 2,00 | 2,00 | #NULL! | #NULL! |
| 45,00 | 2,00 | 2,00 | 2,00 | 2,00 | 2,00 | 2,00 | #NULL! | #NULL! |
| 50,00 | 2,00 | 2,00 | 2,00 | 2,00 | 2,00 | 2,00 | #NULL! | #NULL! |
| 45,00 | 1,00 | 2,00 | 2,00 | 2,00 | 2,00 | 2,00 | #NULL! | #NULL! |
| 78,00 | 2,00 | 1,00 | 2,00 | 2,00 | 2,00 | 2,00 | #NULL! | #NULL! |
| 58,00 | 1,00 | 1,00 | 2,00 | 2,00 | 2,00 | 2,00 | #NULL! | #NULL! |
| 43,00 | 2,00 | 2,00 | 2,00 | 2,00 | 2,00 | 1,00 | 30,00  | #NULL! |
| 65,00 | 1,00 | 1,00 | 2,00 | 2,00 | 2,00 | 2,00 | #NULL! | #NULL! |
| 49,00 | 1,00 | 1,00 | 2,00 | 2,00 | 2,00 | 2,00 | #NULL! | #NULL! |
| 60,00 | 1,00 | 2,00 | 2,00 | 2,00 | 2,00 | 2,00 | #NULL! | #NULL! |
| 49,00 | 2,00 | 2,00 | 2,00 | 2,00 | 2,00 | 2,00 | #NULL! | #NULL! |
| 49,00 | 1,00 | 2,00 | 2,00 | 2,00 | 2,00 | 2,00 | #NULL! | #NULL! |
| 69,00 | 2,00 | 1,00 | 1,00 | 1,00 | 2,00 | 2,00 | #NULL! | #NULL! |
| 48,00 | 2,00 | 2,00 | 2,00 | 2,00 | 2,00 | 2,00 | #NULL! | #NULL! |
| 49,00 | 1,00 | 1,00 | 2,00 | 2,00 | 2,00 | 2,00 | #NULL! | #NULL! |
| 49,00 | 1,00 | 2,00 | 2,00 | 2,00 | 2,00 | 2,00 | #NULL! | #NULL! |
| 48,00 | 2,00 | 2,00 | 2,00 | 2,00 | 2,00 | 2,00 | #NULL! | #NULL! |
| 46,00 | 2,00 | 2,00 | 2,00 | 2,00 | 2,00 | 2,00 | #NULL! | #NULL! |
| 52,00 | 1,00 | 2,00 | 2,00 | 2,00 | 2,00 | 1,00 | 15,00  | #NULL! |
| 51,00 | 1,00 | 2,00 | 2,00 | 2,00 | 2,00 | 2,00 | #NULL! | #NULL! |
| 56,00 | 2,00 | 2,00 | 2,00 | 2,00 | 2,00 | 1,00 | 20,00  | #NULL! |
| 50,00 | 1,00 | 2,00 | 2,00 | 2,00 | 2,00 | 2,00 | #NULL! | #NULL! |
| 57,00 | 2,00 | 2,00 | 2,00 | 2,00 | 2,00 | 1,00 | 15,00  | #NULL! |
| 56,00 | 1,00 | 2,00 | 2,00 | 2,00 | 2,00 | 2,00 | #NULL! | #NULL! |
| 50,00 | 2,00 | 2,00 | 2,00 | 2,00 | 2,00 | 2,00 | #NULL! | #NULL! |
| 56,00 | 2,00 | 2,00 | 2,00 | 2,00 | 2,00 | 2,00 | #NULL! | #NULL! |
| 51,00 | 2,00 | 2,00 | 2,00 | 2,00 | 2,00 | 2,00 | #NULL! | #NULL! |
| 54,00 | 1,00 | 2,00 | 2,00 | 2,00 | 2,00 | 2,00 | #NULL! | #NULL! |
| 46,00 | 2,00 | 2,00 | 2,00 | 2,00 | 2,00 | 2,00 | #NULL! | #NULL! |
| 52,00 | 1,00 | 2,00 | 2,00 | 2,00 | 2,00 | 2,00 | #NULL! | #NULL! |
| 46,00 | 1,00 | 1,00 | 1,00 | 2,00 | 2,00 | 1,00 | 18,00  | #NULL! |

|       |      |      |      |      |      |      |        |        |
|-------|------|------|------|------|------|------|--------|--------|
| 49,00 | 1,00 | 1,00 | 2,00 | 2,00 | 1,00 | 2,00 | #NULL! | #NULL! |
| 45,00 | 1,00 | 2,00 | 2,00 | 2,00 | 2,00 | 2,00 | #NULL! | #NULL! |
| 46,00 | 2,00 | 2,00 | 2,00 | 2,00 | 2,00 | 2,00 | #NULL! | #NULL! |
| 46,00 | 1,00 | 2,00 | 2,00 | 2,00 | 1,00 | 2,00 | #NULL! | #NULL! |
| 56,00 | 2,00 | 2,00 | 2,00 | 2,00 | 2,00 | 2,00 | #NULL! | #NULL! |
| 46,00 | 1,00 | 2,00 | 2,00 | 2,00 | 2,00 | 2,00 | #NULL! | #NULL! |
| 55,00 | 1,00 | 2,00 | 2,00 | 2,00 | 2,00 | 1,00 | 20,00  | #NULL! |
| 46,00 | 1,00 | 2,00 | 2,00 | 2,00 | 2,00 | 2,00 | #NULL! | #NULL! |
| 48,00 | 2,00 | 2,00 | 2,00 | 2,00 | 2,00 | 2,00 | #NULL! | #NULL! |
| 52,00 | 1,00 | 2,00 | 1,00 | 2,00 | 2,00 | 2,00 | #NULL! | #NULL! |
| 45,00 | 2,00 | 2,00 | 2,00 | 2,00 | 2,00 | 2,00 | #NULL! | #NULL! |
| 46,00 | 1,00 | 2,00 | 2,00 | 2,00 | 2,00 | 2,00 | #NULL! | #NULL! |
| 48,00 | 1,00 | 2,00 | 1,00 | 2,00 | 2,00 | 2,00 | #NULL! | #NULL! |
| 50,00 | 1,00 | 2,00 | 2,00 | 2,00 | 2,00 | 2,00 | #NULL! | #NULL! |
| 45,00 | 1,00 | 2,00 | 2,00 | 2,00 | 2,00 | 2,00 | #NULL! | #NULL! |
| 45,00 | 1,00 | 2,00 | 2,00 | 2,00 | 2,00 | 2,00 | #NULL! | #NULL! |
| 46,00 | 1,00 | 2,00 | 2,00 | 2,00 | 2,00 | 2,00 | #NULL! | #NULL! |
| 48,00 | 1,00 | 2,00 | 2,00 | 2,00 | 2,00 | 2,00 | #NULL! | #NULL! |
| 45,00 | 1,00 | 2,00 | 2,00 | 2,00 | 2,00 | 2,00 | #NULL! | #NULL! |
| 46,00 | 1,00 | 2,00 | 2,00 | 1,00 | 2,00 | 2,00 | #NULL! | #NULL! |
| 45,00 | 2,00 | 2,00 | 2,00 | 2,00 | 2,00 | 2,00 | #NULL! | #NULL! |
| 49,00 | 1,00 | 2,00 | 2,00 | 2,00 | 2,00 | 1,00 | 10,00  | #NULL! |
| 48,00 | 2,00 | 2,00 | 2,00 | 2,00 | 2,00 | 2,00 | #NULL! | #NULL! |
| 49,00 | 2,00 | 2,00 | 2,00 | 2,00 | 2,00 | 2,00 | #NULL! | #NULL! |
| 59,00 | 2,00 | 1,00 | 2,00 | 2,00 | 2,00 | 2,00 | #NULL! | #NULL! |
| 71,00 | 2,00 | 1,00 | 1,00 | 1,00 | 2,00 | 2,00 | #NULL! | #NULL! |
| 45,00 | 1,00 | 2,00 | 2,00 | 2,00 | 2,00 | 2,00 | #NULL! | #NULL! |
| 45,00 | 2,00 | 2,00 | 1,00 | 2,00 | 2,00 | 2,00 | #NULL! | #NULL! |
| 50,00 | 1,00 | 2,00 | 2,00 | 2,00 | 2,00 | 2,00 | #NULL! | #NULL! |
| 45,00 | 2,00 | 2,00 | 2,00 | 2,00 | 2,00 | 2,00 | #NULL! | #NULL! |
| 46,00 | 1,00 | 2,00 | 2,00 | 2,00 | 2,00 | 2,00 | #NULL! | #NULL! |
| 48,00 | 1,00 | 1,00 | 2,00 | 1,00 | 2,00 | 2,00 | #NULL! | #NULL! |
| 52,00 | 1,00 | 1,00 | 1,00 | 1,00 | 1,00 | 2,00 | #NULL! | #NULL! |
| 51,00 | 2,00 | 1,00 | 2,00 | 2,00 | 2,00 | 2,00 | #NULL! | #NULL! |
| 52,00 | 1,00 | 1,00 | 1,00 | 2,00 | 2,00 | 2,00 | #NULL! | #NULL! |
| 48,00 | 2,00 | 2,00 | 2,00 | 2,00 | 2,00 | 2,00 | #NULL! | #NULL! |
| 49,00 | 1,00 | 1,00 | 2,00 | 2,00 | 2,00 | 1,00 | 25,00  | #NULL! |
| 49,00 | 2,00 | 2,00 | 2,00 | 2,00 | 2,00 | 2,00 | #NULL! | #NULL! |
| 51,00 | 1,00 | 1,00 | 1,00 | 2,00 | 2,00 | 2,00 | #NULL! | #NULL! |
| 49,00 | 2,00 | 1,00 | 2,00 | 2,00 | 2,00 | 2,00 | #NULL! | #NULL! |
| 50,00 | 1,00 | 1,00 | 2,00 | 2,00 | 2,00 | 2,00 | #NULL! | #NULL! |
| 47,00 | 2,00 | 2,00 | 2,00 | 2,00 | 2,00 | 2,00 | #NULL! | #NULL! |
| 67,00 | 2,00 | 2,00 | 2,00 | 2,00 | 2,00 | 2,00 | #NULL! | #NULL! |
| 78,00 | 2,00 | 2,00 | 2,00 | 2,00 | 2,00 | 2,00 | #NULL! | #NULL! |
| 49,00 | 2,00 | 1,00 | 2,00 | 2,00 | 2,00 | 2,00 | #NULL! | #NULL! |
| 48,00 | 1,00 | 2,00 | 1,00 | 2,00 | 2,00 | 1,00 | 10,00  | #NULL! |
| 50,00 | 1,00 | 2,00 | 2,00 | 2,00 | 2,00 | 1,00 | 20,00  | #NULL! |
| 45,00 | 2,00 | 2,00 | 2,00 | 2,00 | 2,00 | 1,00 | 12,00  | #NULL! |
| 50,00 | 1,00 | 2,00 | 2,00 | 2,00 | 2,00 | 2,00 | #NULL! | #NULL! |
| 48,00 | 2,00 | 1,00 | 2,00 | 2,00 | 2,00 | 1,00 | 8,00   | #NULL! |

|       |      |      |      |      |      |      |        |        |
|-------|------|------|------|------|------|------|--------|--------|
| 49,00 | 1,00 | 2,00 | 2,00 | 2,00 | 2,00 | 2,00 | #NULL! | #NULL! |
| 48,00 | 2,00 | 1,00 | 2,00 | 2,00 | 2,00 | 2,00 | #NULL! | #NULL! |
| 50,00 | 1,00 | 2,00 | 2,00 | 2,00 | 2,00 | 2,00 | #NULL! | #NULL! |
| 50,00 | 1,00 | 1,00 | 1,00 | 2,00 | 2,00 | 1,00 | 20,00  | #NULL! |
| 53,00 | 2,00 | 1,00 | 1,00 | 2,00 | 2,00 | 1,00 | 20,00  | #NULL! |
| 52,00 | 1,00 | 1,00 | 1,00 | 2,00 | 2,00 | 1,00 | 24,00  | #NULL! |
| 54,00 | 2,00 | 1,00 | 1,00 | 2,00 | 2,00 | 1,00 | 20,00  | #NULL! |
| 52,00 | 1,00 | 2,00 | 2,00 | 2,00 | 2,00 | 2,00 | #NULL! | #NULL! |
| 48,00 | 2,00 | 2,00 | 2,00 | 2,00 | 2,00 | 2,00 | #NULL! | #NULL! |
| 56,00 | 1,00 | 1,00 | 1,00 | 2,00 | 2,00 | 2,00 | #NULL! | #NULL! |
| 55,00 | 2,00 | 1,00 | 1,00 | 2,00 | 2,00 | 2,00 | #NULL! | #NULL! |
| 50,00 | 1,00 | 2,00 | 2,00 | 2,00 | 2,00 | 1,00 | 25,00  | #NULL! |
| 60,00 | 1,00 | 2,00 | 2,00 | 2,00 | 2,00 | 2,00 | #NULL! | #NULL! |
| 60,00 | 1,00 | 2,00 | 2,00 | 2,00 | 2,00 | 2,00 | #NULL! | #NULL! |
| 45,00 | 1,00 | 2,00 | 2,00 | 2,00 | 2,00 | 2,00 | #NULL! | #NULL! |
| 47,00 | 1,00 | 1,00 | 1,00 | 2,00 | 2,00 | 2,00 | #NULL! | #NULL! |
| 47,00 | 2,00 | 1,00 | 1,00 | 2,00 | 2,00 | 2,00 | #NULL! | #NULL! |
| 45,00 | 1,00 | 1,00 | 1,00 | 2,00 | 2,00 | 2,00 | #NULL! | #NULL! |
| 45,00 | 2,00 | 1,00 | 1,00 | 2,00 | 2,00 | 2,00 | #NULL! | #NULL! |
| 57,00 | 1,00 | 1,00 | 1,00 | 2,00 | 2,00 | 1,00 | 40,00  | #NULL! |
| 51,00 | 2,00 | 2,00 | 2,00 | 2,00 | 2,00 | 2,00 | #NULL! | #NULL! |
| 53,00 | 2,00 | 2,00 | 2,00 | 2,00 | 2,00 | 2,00 | #NULL! | #NULL! |
| 55,00 | 1,00 | 2,00 | 2,00 | 2,00 | 2,00 | 2,00 | #NULL! | #NULL! |
| 52,00 | 2,00 | 2,00 | 2,00 | 2,00 | 2,00 | 1,00 | 5,00   | #NULL! |
| 62,00 | 2,00 | 2,00 | 2,00 | 2,00 | 2,00 | 1,00 | 30,00  | #NULL! |
| 61,00 | 1,00 | 1,00 | 2,00 | 2,00 | 2,00 | 2,00 | #NULL! | #NULL! |
| 50,00 | 2,00 | 2,00 | 1,00 | 2,00 | 2,00 | 1,00 | 20,00  | #NULL! |
| 61,00 | 1,00 | 1,00 | 2,00 | 2,00 | 2,00 | 2,00 | #NULL! | #NULL! |
| 54,00 | 2,00 | 2,00 | 2,00 | 2,00 | 2,00 | 2,00 | #NULL! | #NULL! |
| 45,00 | 1,00 | 2,00 | 2,00 | 2,00 | 2,00 | 2,00 | #NULL! | #NULL! |
| 46,00 | 2,00 | 2,00 | 2,00 | 2,00 | 2,00 | 2,00 | #NULL! | #NULL! |
| 62,00 | 1,00 | 1,00 | 2,00 | 2,00 | 2,00 | 2,00 | #NULL! | #NULL! |
| 58,00 | 1,00 | 2,00 | 2,00 | 2,00 | 2,00 | 2,00 | #NULL! | #NULL! |
| 63,00 | 1,00 | 1,00 | 2,00 | 2,00 | 2,00 | 1,00 | 40,00  | #NULL! |
| 64,00 | 1,00 | 1,00 | 2,00 | 2,00 | 2,00 | 1,00 | 42,00  | #NULL! |
| 51,00 | 1,00 | 1,00 | 2,00 | 2,00 | 2,00 | 1,00 | 20,00  | #NULL! |
| 48,00 | 2,00 | 1,00 | 2,00 | 2,00 | 2,00 | 2,00 | #NULL! | #NULL! |
| 46,00 | 1,00 | 2,00 | 2,00 | 2,00 | 2,00 | 2,00 | #NULL! | #NULL! |
| 45,00 | 2,00 | 2,00 | 2,00 | 2,00 | 2,00 | 2,00 | #NULL! | #NULL! |
| 81,00 | 2,00 | 1,00 | 2,00 | 2,00 | 2,00 | 2,00 | #NULL! | #NULL! |
| 88,00 | 1,00 | 1,00 | 1,00 | 2,00 | 2,00 | 2,00 | #NULL! | #NULL! |
| 56,00 | 2,00 | 2,00 | 2,00 | 2,00 | 2,00 | 2,00 | #NULL! | #NULL! |
| 66,00 | 1,00 | 2,00 | 2,00 | 2,00 | 2,00 | 2,00 | #NULL! | #NULL! |
| 49,00 | 2,00 | 2,00 | 2,00 | 2,00 | 2,00 | 2,00 | #NULL! | #NULL! |
| 50,00 | 1,00 | 1,00 | 2,00 | 2,00 | 2,00 | 1,00 | 20,00  | #NULL! |
| 69,00 | 1,00 | 1,00 | 1,00 | 2,00 | 2,00 | 2,00 | #NULL! | #NULL! |
| 62,00 | 1,00 | 1,00 | 1,00 | 2,00 | 1,00 | 2,00 | #NULL! | #NULL! |
| 59,00 | 1,00 | 1,00 | 2,00 | 2,00 | 1,00 | 2,00 | #NULL! | #NULL! |
| 58,00 | 1,00 | 2,00 | 2,00 | 2,00 | 2,00 | 2,00 | #NULL! | #NULL! |
| 55,00 | 1,00 | 1,00 | 1,00 | 2,00 | 1,00 | 1,00 | 20,00  | #NULL! |









|       |      |      |      |      |      |      |        |        |
|-------|------|------|------|------|------|------|--------|--------|
| 60,00 | 1,00 | 1,00 | 2,00 | 2,00 | 2,00 | 2,00 | #NULL! | #NULL! |
| 72,00 | 1,00 | 1,00 | 2,00 | 2,00 | 2,00 | 2,00 | #NULL! | #NULL! |
| 68,00 | 2,00 | 1,00 | 2,00 | 2,00 | 2,00 | 2,00 | #NULL! | #NULL! |
| 58,00 | 1,00 | 2,00 | 2,00 | 2,00 | 2,00 | 2,00 | #NULL! | #NULL! |
| 58,00 | 2,00 | 1,00 | 2,00 | 2,00 | 1,00 | 2,00 | #NULL! | #NULL! |
| 72,00 | 1,00 | 1,00 | 2,00 | 1,00 | 2,00 | 2,00 | #NULL! | #NULL! |
| 50,00 | 1,00 | 2,00 | 2,00 | 2,00 | 1,00 | 2,00 | #NULL! | #NULL! |
| 52,00 | 1,00 | 2,00 | 2,00 | 2,00 | 2,00 | 1,00 | 15,00  | #NULL! |
| 50,00 | 1,00 | 2,00 | 2,00 | 2,00 | 2,00 | 2,00 | #NULL! | #NULL! |
| 63,00 | 1,00 | 1,00 | 2,00 | 1,00 | 2,00 | 2,00 | #NULL! | #NULL! |
| 80,00 | 1,00 | 1,00 | 2,00 | 2,00 | 1,00 | 2,00 | #NULL! | #NULL! |
| 80,00 | 1,00 | 1,00 | 2,00 | 2,00 | 2,00 | 2,00 | #NULL! | #NULL! |
| 45,00 | 1,00 | 2,00 | 2,00 | 2,00 | 2,00 | 2,00 | #NULL! | #NULL! |
| 60,00 | 2,00 | 1,00 | 2,00 | 2,00 | 2,00 | 2,00 | #NULL! | #NULL! |
| 54,00 | 1,00 | 2,00 | 2,00 | 2,00 | 2,00 | 2,00 | #NULL! | #NULL! |
| 52,00 | 2,00 | 1,00 | 2,00 | 2,00 | 2,00 | 2,00 | #NULL! | #NULL! |
| 51,00 | 1,00 | 2,00 | 2,00 | 2,00 | 2,00 | 2,00 | #NULL! | #NULL! |
| 49,00 | 2,00 | 2,00 | 2,00 | 2,00 | 2,00 | 2,00 | #NULL! | #NULL! |
| 51,00 | 1,00 | 2,00 | 2,00 | 2,00 | 2,00 | 2,00 | #NULL! | #NULL! |
| 43,00 | 1,00 | 2,00 | 2,00 | 2,00 | 2,00 | 1,00 | 40,00  | #NULL! |
| 80,00 | 1,00 | 1,00 | 2,00 | 2,00 | 2,00 | 2,00 | #NULL! | #NULL! |
| 54,00 | 1,00 | 2,00 | 2,00 | 2,00 | 2,00 | 1,00 | 15,00  | #NULL! |
| 65,00 | 1,00 | 1,00 | 1,00 | 2,00 | 2,00 | 1,00 | 45,00  | #NULL! |
| 60,00 | 2,00 | 1,00 | 2,00 | 2,00 | 2,00 | 2,00 | #NULL! | #NULL! |
| 75,00 | 1,00 | 1,00 | 2,00 | 1,00 | 2,00 | 1,00 | 50,00  | #NULL! |
| 65,00 | 1,00 | 1,00 | 2,00 | 1,00 | 2,00 | 1,00 | 45,00  | #NULL! |
| 62,00 | 1,00 | 2,00 | 2,00 | 2,00 | 2,00 | 1,00 | 20,00  | #NULL! |
| 56,00 | 1,00 | 2,00 | 1,00 | 2,00 | 2,00 | 2,00 | #NULL! | #NULL! |
| 55,00 | 1,00 | 2,00 | 2,00 | 2,00 | 2,00 | 2,00 | #NULL! | #NULL! |
| 49,00 | 2,00 | 2,00 | 2,00 | 2,00 | 2,00 | 2,00 | #NULL! | #NULL! |
| 50,00 | 1,00 | 2,00 | 2,00 | 2,00 | 2,00 | 1,00 | 25,00  | #NULL! |
| 55,00 | 2,00 | 1,00 | 2,00 | 2,00 | 2,00 | 2,00 | #NULL! | #NULL! |
| 72,00 | 1,00 | 2,00 | 2,00 | 2,00 | 2,00 | 2,00 | #NULL! | #NULL! |
| 75,00 | 1,00 | 2,00 | 2,00 | 1,00 | 2,00 | 2,00 | #NULL! | #NULL! |
| 58,00 | 1,00 | 2,00 | 2,00 | 2,00 | 2,00 | 1,00 | 30,00  | #NULL! |
| 62,00 | 2,00 | 1,00 | 1,00 | 2,00 | 2,00 | 2,00 | #NULL! | #NULL! |
| 51,00 | 2,00 | 2,00 | 2,00 | 2,00 | 2,00 | 2,00 | #NULL! | #NULL! |
| 56,00 | 2,00 | 2,00 | 2,00 | 2,00 | 2,00 | 2,00 | #NULL! | #NULL! |
| 50,00 | 2,00 | 1,00 | 2,00 | 1,00 | 1,00 | 2,00 | #NULL! | #NULL! |
| 55,00 | 1,00 | 2,00 | 2,00 | 2,00 | 2,00 | 1,00 | 90,00  | #NULL! |
| 49,00 | 1,00 | 1,00 | 2,00 | 2,00 | 2,00 | 1,00 | 25,00  | #NULL! |
| 65,00 | 1,00 | 1,00 | 1,00 | 2,00 | 2,00 | 2,00 | #NULL! | #NULL! |
| 55,00 | 1,00 | 2,00 | 1,00 | 2,00 | 2,00 | 1,00 | 40,00  | #NULL! |
| 72,00 | 2,00 | 1,00 | 2,00 | 2,00 | 2,00 | 2,00 | #NULL! | #NULL! |
| 54,00 | 1,00 | 1,00 | 2,00 | 2,00 | 2,00 | 1,00 | 60,00  | #NULL! |
| 51,00 | 2,00 | 1,00 | 1,00 | 1,00 | 1,00 | 1,00 | 30,00  | #NULL! |
| 54,00 | 2,00 | 2,00 | 2,00 | 2,00 | 1,00 | 1,00 | 30,00  | #NULL! |
| 56,00 | 2,00 | 1,00 | 2,00 | 2,00 | 2,00 | 2,00 | #NULL! | #NULL! |
| 60,00 | 1,00 | 2,00 | 2,00 | 2,00 | 2,00 | 1,00 | 60,00  | #NULL! |
| 51,00 | 2,00 | 2,00 | 2,00 | 2,00 | 1,00 | 2,00 | #NULL! | #NULL! |

|       |      |      |      |      |      |      |        |        |
|-------|------|------|------|------|------|------|--------|--------|
| 86,00 | 2,00 | 1,00 | 2,00 | 2,00 | 2,00 | 2,00 | #NULL! | #NULL! |
| 56,00 | 2,00 | 2,00 | 2,00 | 2,00 | 2,00 | 2,00 | #NULL! | #NULL! |
| 49,00 | 1,00 | 2,00 | 2,00 | 2,00 | 2,00 | 2,00 | #NULL! | #NULL! |
| 60,00 | 1,00 | 2,00 | 2,00 | 2,00 | 2,00 | 1,00 | 40,00  | #NULL! |
| 61,00 | 1,00 | 2,00 | 1,00 | 2,00 | 2,00 | 1,00 | 46,00  | #NULL! |
| 65,00 | 2,00 | 2,00 | 1,00 | 2,00 | 2,00 | 2,00 | #NULL! | #NULL! |
| 48,00 | 2,00 | 2,00 | 2,00 | 2,00 | 2,00 | 1,00 | 14,00  | #NULL! |
| 45,00 | 2,00 | 2,00 | 2,00 | 2,00 | 2,00 | 2,00 | #NULL! | #NULL! |
| 70,00 | 2,00 | 1,00 | 2,00 | 2,00 | 1,00 | 2,00 | #NULL! | #NULL! |
| 74,00 | 1,00 | 2,00 | 1,00 | 1,00 | 2,00 | 2,00 | #NULL! | #NULL! |
| 58,00 | 2,00 | 1,00 | 1,00 | 2,00 | 1,00 | 2,00 | #NULL! | #NULL! |
| 47,00 | 2,00 | 1,00 | 1,00 | 1,00 | 2,00 | 2,00 | #NULL! | #NULL! |
| 48,00 | 1,00 | 2,00 | 1,00 | 2,00 | 1,00 | 2,00 | #NULL! | #NULL! |
| 47,00 | 2,00 | 2,00 | 2,00 | 2,00 | 1,00 | 2,00 | #NULL! | #NULL! |
| 62,00 | 1,00 | 2,00 | 2,00 | 1,00 | 2,00 | 2,00 | #NULL! | #NULL! |
| 62,00 | 2,00 | 2,00 | 2,00 | 1,00 | 2,00 | 2,00 | #NULL! | #NULL! |
| 48,00 | 1,00 | 2,00 | 1,00 | 2,00 | 1,00 | 2,00 | #NULL! | #NULL! |
| 47,00 | 2,00 | 2,00 | 2,00 | 2,00 | 1,00 | 2,00 | #NULL! | #NULL! |
| 66,00 | 1,00 | 1,00 | 2,00 | 1,00 | 1,00 | 2,00 | 30,00  | 1,00   |
| 65,00 | 1,00 | 2,00 | 2,00 | 2,00 | 2,00 | 2,00 | #NULL! | #NULL! |
| 54,00 | 1,00 | 2,00 | 2,00 | 2,00 | 2,00 | 2,00 | #NULL! | #NULL! |
| 45,00 | 2,00 | 2,00 | 2,00 | 2,00 | 2,00 | 2,00 | #NULL! | #NULL! |
| 55,00 | 1,00 | 2,00 | 2,00 | 2,00 | 2,00 | 2,00 | #NULL! | #NULL! |
| 72,00 | 1,00 | 2,00 | 2,00 | 2,00 | 2,00 | 2,00 | #NULL! | #NULL! |
| 50,00 | 1,00 | 2,00 | 1,00 | 2,00 | 2,00 | 2,00 | #NULL! | #NULL! |
| 62,00 | 1,00 | 1,00 | 1,00 | 2,00 | 2,00 | 2,00 | #NULL! | #NULL! |
| 50,00 | 1,00 | 2,00 | 2,00 | 2,00 | 2,00 | 2,00 | #NULL! | #NULL! |
| 56,00 | 1,00 | 1,00 | 2,00 | 2,00 | 2,00 | 2,00 | #NULL! | #NULL! |
| 56,00 | 1,00 | 2,00 | 2,00 | 1,00 | 1,00 | 2,00 | #NULL! | #NULL! |
| 56,00 | 1,00 | 2,00 | 2,00 | 2,00 | 2,00 | 2,00 | #NULL! | #NULL! |
| 50,00 | 1,00 | 2,00 | 1,00 | 2,00 | 1,00 | 2,00 | #NULL! | #NULL! |
| 50,00 | 2,00 | 2,00 | 2,00 | 2,00 | 2,00 | 2,00 | #NULL! | #NULL! |
| 46,00 | 2,00 | 2,00 | 2,00 | 2,00 | 2,00 | 2,00 | #NULL! | #NULL! |
| 56,00 | 1,00 | 1,00 | 2,00 | 2,00 | 2,00 | 2,00 | #NULL! | #NULL! |
| 50,00 | 1,00 | 2,00 | 2,00 | 2,00 | 2,00 | 2,00 | #NULL! | #NULL! |
| 56,00 | 1,00 | 1,00 | 2,00 | 2,00 | 2,00 | 2,00 | #NULL! | #NULL! |
| 45,00 | 2,00 | 2,00 | 2,00 | 2,00 | 2,00 | 2,00 | #NULL! | #NULL! |
| 50,00 | 2,00 | 1,00 | 2,00 | 2,00 | 2,00 | 2,00 | #NULL! | #NULL! |
| 54,00 | 1,00 | 2,00 | 2,00 | 1,00 | 2,00 | 2,00 | 10,00  | 20,00  |
| 56,00 | 1,00 | 2,00 | 2,00 | 2,00 | 2,00 | 2,00 | #NULL! | #NULL! |
| 49,00 | 2,00 | 2,00 | 2,00 | 2,00 | 2,00 | 2,00 | #NULL! | #NULL! |
| 52,00 | 2,00 | 1,00 | 2,00 | 2,00 | 2,00 | 2,00 | #NULL! | #NULL! |
| 63,00 | 1,00 | 1,00 | 2,00 | 2,00 | 2,00 | 2,00 | #NULL! | #NULL! |
| 60,00 | 2,00 | 1,00 | 2,00 | 2,00 | 2,00 | 2,00 | #NULL! | #NULL! |
| 45,00 | 2,00 | 2,00 | 2,00 | 2,00 | 2,00 | 2,00 | #NULL! | #NULL! |
| 50,00 | 2,00 | 1,00 | 2,00 | 2,00 | 2,00 | 2,00 | #NULL! | #NULL! |
| 50,00 | 1,00 | 2,00 | 2,00 | 2,00 | 2,00 | 1,00 | 10,00  | #NULL! |
| 55,00 | 1,00 | 1,00 | 2,00 | 1,00 | 2,00 | 2,00 | #NULL! | #NULL! |
| 49,00 | 1,00 | 2,00 | 2,00 | 2,00 | 2,00 | 1,00 | 2,00   | #NULL! |
| 49,00 | 2,00 | 2,00 | 2,00 | 2,00 | 2,00 | 2,00 | #NULL! | #NULL! |



|       |      |      |      |      |      |      |        |        |
|-------|------|------|------|------|------|------|--------|--------|
| 49,00 | 1,00 | 2,00 | 2,00 | 2,00 | 2,00 | 2,00 | #NULL! | #NULL! |
| 53,00 | 1,00 | 1,00 | 2,00 | 2,00 | 2,00 | 2,00 | #NULL! | #NULL! |
| 54,00 | 2,00 | 1,00 | 2,00 | 2,00 | 2,00 | 2,00 | #NULL! | #NULL! |
| 66,00 | 2,00 | 1,00 | 2,00 | 2,00 | 2,00 | 2,00 | #NULL! | #NULL! |
| 67,00 | 1,00 | 1,00 | 1,00 | 2,00 | 2,00 | 2,00 | #NULL! | #NULL! |
| 48,00 | 2,00 | 2,00 | 2,00 | 2,00 | 2,00 | 2,00 | #NULL! | #NULL! |
| 48,00 | 1,00 | 2,00 | 2,00 | 2,00 | 2,00 | 2,00 | #NULL! | #NULL! |
| 75,00 | 2,00 | 1,00 | 2,00 | 2,00 | 2,00 | 2,00 | #NULL! | #NULL! |
| 77,00 | 1,00 | 2,00 | 2,00 | 2,00 | 2,00 | 2,00 | #NULL! | #NULL! |
| 45,00 | 1,00 | 2,00 | 2,00 | 2,00 | 2,00 | 2,00 | #NULL! | #NULL! |
| 76,00 | 1,00 | 1,00 | 2,00 | 2,00 | 2,00 | 2,00 | #NULL! | #NULL! |
| 73,00 | 2,00 | 1,00 | 2,00 | 2,00 | 1,00 | 1,00 | 20,00  | #NULL! |
| 65,00 | 2,00 | 2,00 | 2,00 | 2,00 | 1,00 | 1,00 | 40,00  | #NULL! |
| 62,00 | 1,00 | 2,00 | 2,00 | 2,00 | 2,00 | 2,00 | #NULL! | #NULL! |
| 51,00 | 1,00 | 2,00 | 2,00 | 2,00 | 2,00 | 2,00 | #NULL! | #NULL! |
| 60,00 | 1,00 | 1,00 | 2,00 | 1,00 | 1,00 | 1,00 | 80,00  | #NULL! |
| 59,00 | 1,00 | 2,00 | 2,00 | 2,00 | 2,00 | 1,00 | 30,00  | #NULL! |
| 50,00 | 1,00 | 2,00 | 2,00 | 2,00 | 2,00 | 2,00 | #NULL! | #NULL! |
| 45,00 | 1,00 | 2,00 | 2,00 | 2,00 | 2,00 | 2,00 | #NULL! | #NULL! |
| 75,00 | 1,00 | 1,00 | 1,00 | 2,00 | 1,00 | 2,00 | #NULL! | #NULL! |
| 74,00 | 1,00 | 2,00 | 1,00 | 2,00 | 2,00 | 2,00 | #NULL! | #NULL! |
| 81,00 | 1,00 | 1,00 | 2,00 | 2,00 | 2,00 | 2,00 | #NULL! | #NULL! |
| 61,00 | 1,00 | 1,00 | 1,00 | 1,00 | 1,00 | 2,00 | #NULL! | #NULL! |
| 72,00 | 1,00 | 1,00 | 2,00 | 1,00 | 1,00 | 2,00 | #NULL! | #NULL! |
| 61,00 | 1,00 | 2,00 | 2,00 | 2,00 | 2,00 | 2,00 | #NULL! | #NULL! |
| 50,00 | 1,00 | 2,00 | 2,00 | 2,00 | 2,00 | 2,00 | #NULL! | #NULL! |
| 55,00 | 2,00 | 2,00 | 2,00 | 1,00 | 2,00 | 2,00 | #NULL! | #NULL! |
| 67,00 | 1,00 | 2,00 | 2,00 | 2,00 | 2,00 | 1,00 | 20,00  | #NULL! |
| 46,00 | 2,00 | 2,00 | 2,00 | 2,00 | 1,00 | 2,00 | #NULL! | #NULL! |
| 45,00 | 2,00 | 2,00 | 2,00 | 2,00 | 2,00 | 1,00 | 30,00  | #NULL! |
| 68,00 | 2,00 | 2,00 | 2,00 | 2,00 | 2,00 | 2,00 | #NULL! | #NULL! |
| 46,00 | 2,00 | 2,00 | 2,00 | 2,00 | 2,00 | 1,00 | 7,00   | #NULL! |
| 45,00 | 1,00 | 2,00 | 2,00 | 2,00 | 2,00 | 2,00 | #NULL! | #NULL! |
| 69,00 | 2,00 | 1,00 | 2,00 | 1,00 | 2,00 | 2,00 | #NULL! | #NULL! |
| 79,00 | 1,00 | 2,00 | 2,00 | 1,00 | 2,00 | 2,00 | #NULL! | #NULL! |
| 50,00 | 1,00 | 2,00 | 1,00 | 2,00 | 2,00 | 2,00 | #NULL! | #NULL! |
| 50,00 | 2,00 | 2,00 | 2,00 | 2,00 | 2,00 | 2,00 | #NULL! | #NULL! |
| 68,00 | 2,00 | 2,00 | 2,00 | 2,00 | 2,00 | 2,00 | #NULL! | #NULL! |
| 54,00 | 2,00 | 2,00 | 2,00 | 2,00 | 2,00 | 1,00 | 20,00  | #NULL! |
| 78,00 | 2,00 | 1,00 | 2,00 | 1,00 | 1,00 | 2,00 | #NULL! | #NULL! |
| 76,00 | 2,00 | 2,00 | 2,00 | 2,00 | 2,00 | 2,00 | #NULL! | #NULL! |
| 80,00 | 1,00 | 2,00 | 1,00 | 2,00 | 2,00 | 2,00 | #NULL! | #NULL! |
| 55,00 | 2,00 | 1,00 | 2,00 | 2,00 | 2,00 | 2,00 | #NULL! | #NULL! |
| 63,00 | 1,00 | 2,00 | 2,00 | 2,00 | 2,00 | 2,00 | #NULL! | #NULL! |
| 48,00 | 2,00 | 1,00 | 1,00 | 2,00 | 2,00 | 1,00 | 15,00  | #NULL! |
| 55,00 | 2,00 | 2,00 | 2,00 | 2,00 | 2,00 | 2,00 | #NULL! | #NULL! |
| 45,00 | 2,00 | 2,00 | 2,00 | 2,00 | 2,00 | 1,00 | 25,00  | #NULL! |
| 48,00 | 1,00 | 2,00 | 2,00 | 2,00 | 2,00 | 1,00 | 30,00  | #NULL! |
| 46,00 | 2,00 | 2,00 | 2,00 | 2,00 | 2,00 | 1,00 | 15,00  | #NULL! |
| 66,00 | 1,00 | 1,00 | 2,00 | 1,00 | 2,00 | 2,00 | #NULL! | #NULL! |

|       |      |      |      |      |      |      |        |        |
|-------|------|------|------|------|------|------|--------|--------|
| 60,00 | 2,00 | 1,00 | 1,00 | 2,00 | 2,00 | 2,00 | #NULL! | #NULL! |
| 60,00 | 1,00 | 1,00 | 2,00 | 2,00 | 1,00 | 2,00 | #NULL! | #NULL! |
| 65,00 | 1,00 | 2,00 | 2,00 | 2,00 | 2,00 | 2,00 | #NULL! | #NULL! |
| 54,00 | 1,00 | 2,00 | 2,00 | 2,00 | 1,00 | 1,00 | 40,00  | #NULL! |
| 47,00 | 2,00 | 2,00 | 1,00 | 2,00 | 2,00 | 1,00 | 30,00  | #NULL! |
| 49,00 | 2,00 | 1,00 | 2,00 | 2,00 | 2,00 | 1,00 | 15,00  | #NULL! |
| 52,00 | 1,00 | 2,00 | 2,00 | 2,00 | 2,00 | 2,00 | #NULL! | #NULL! |
| 55,00 | 1,00 | 1,00 | 2,00 | 2,00 | 1,00 | 2,00 | #NULL! | #NULL! |
| 74,00 | 2,00 | 2,00 | 2,00 | 2,00 | 2,00 | 2,00 | #NULL! | #NULL! |
| 74,00 | 2,00 | 1,00 | 2,00 | 2,00 | 2,00 | 2,00 | #NULL! | #NULL! |
| 57,00 | 1,00 | 2,00 | 2,00 | 1,00 | 2,00 | 2,00 | #NULL! | #NULL! |
| 59,00 | 1,00 | 1,00 | 1,00 | 2,00 | 1,00 | 2,00 | #NULL! | #NULL! |
| 69,00 | 1,00 | 1,00 | 2,00 | 1,00 | 1,00 | 1,00 | 100,00 | #NULL! |
| 64,00 | 1,00 | 1,00 | 1,00 | 1,00 | 1,00 | 2,00 | 75,00  | 9,00   |
| 53,00 | 2,00 | 1,00 | 2,00 | 2,00 | 1,00 | 2,00 | #NULL! | #NULL! |
| 64,00 | 1,00 | 1,00 | 2,00 | 1,00 | 1,00 | 1,00 | 135,00 | #NULL! |
| 54,00 | 2,00 | 2,00 | 2,00 | 2,00 | 2,00 | 2,00 | #NULL! | #NULL! |
| 49,00 | 1,00 | 2,00 | 2,00 | 2,00 | 2,00 | 2,00 | #NULL! | #NULL! |
| 56,00 | 1,00 | 1,00 | 2,00 | 1,00 | 2,00 | 1,00 | 40,00  | #NULL! |
| 54,00 | 1,00 | 1,00 | 2,00 | 2,00 | 2,00 | 1,00 | 30,00  | #NULL! |
| 58,00 | 1,00 | 1,00 | 2,00 | 2,00 | 2,00 | 1,00 | 34,00  | #NULL! |
| 48,00 | 2,00 | 2,00 | 1,00 | 2,00 | 1,00 | 2,00 | #NULL! | #NULL! |
| 50,00 | 2,00 | 1,00 | 1,00 | 2,00 | 1,00 | 2,00 | #NULL! | #NULL! |
| 54,00 | 2,00 | 1,00 | 2,00 | 2,00 | 1,00 | 2,00 | #NULL! | #NULL! |
| 62,00 | 1,00 | 1,00 | 1,00 | 1,00 | 1,00 | 2,00 | 90,00  | 20,00  |
| 53,00 | 2,00 | 2,00 | 2,00 | 2,00 | 2,00 | 2,00 | #NULL! | #NULL! |
| 61,00 | 1,00 | 1,00 | 2,00 | 1,00 | 2,00 | 2,00 | #NULL! | #NULL! |
| 72,00 | 2,00 | 1,00 | 2,00 | 1,00 | 1,00 | 1,00 | 40,00  | #NULL! |
| 76,00 | 1,00 | 1,00 | 2,00 | 1,00 | 1,00 | 1,00 | 100,00 | #NULL! |
| 49,00 | 2,00 | 2,00 | 2,00 | 2,00 | 2,00 | 2,00 | #NULL! | #NULL! |
| 59,00 | 1,00 | 1,00 | 2,00 | 1,00 | 2,00 | 1,00 | 40,00  | #NULL! |
| 49,00 | 1,00 | 2,00 | 2,00 | 2,00 | 2,00 | 2,00 | #NULL! | #NULL! |
| 48,00 | 2,00 | 2,00 | 2,00 | 2,00 | 2,00 | 2,00 | #NULL! | #NULL! |
| 60,00 | 1,00 | 1,00 | 2,00 | 1,00 | 2,00 | 1,00 | 25,00  | #NULL! |
| 57,00 | 2,00 | 1,00 | 1,00 | 2,00 | 1,00 | 2,00 | #NULL! | #NULL! |
| 60,00 | 2,00 | 1,00 | 1,00 | 1,00 | 1,00 | 2,00 | #NULL! | #NULL! |
| 66,00 | 1,00 | 1,00 | 2,00 | 2,00 | 2,00 | 1,00 | 40,00  | #NULL! |
| 54,00 | 2,00 | 2,00 | 2,00 | 2,00 | 2,00 | 2,00 | #NULL! | #NULL! |
| 68,00 | 1,00 | 1,00 | 2,00 | 2,00 | 2,00 | 2,00 | #NULL! | #NULL! |
| 56,00 | 2,00 | 2,00 | 2,00 | 2,00 | 2,00 | 2,00 | #NULL! | #NULL! |
| 62,00 | 1,00 | 1,00 | 2,00 | 2,00 | 2,00 | 2,00 | #NULL! | #NULL! |
| 63,00 | 1,00 | 2,00 | 1,00 | 2,00 | 2,00 | 2,00 | #NULL! | #NULL! |
| 55,00 | 2,00 | 2,00 | 2,00 | 2,00 | 2,00 | 1,00 | 20,00  | #NULL! |
| 49,00 | 1,00 | 2,00 | 2,00 | 2,00 | 2,00 | 2,00 | #NULL! | #NULL! |
| 48,00 | 2,00 | 2,00 | 2,00 | 2,00 | 2,00 | 2,00 | #NULL! | #NULL! |
| 52,00 | 2,00 | 2,00 | 2,00 | 2,00 | 2,00 | 2,00 | #NULL! | #NULL! |
| 56,00 | 1,00 | 2,00 | 2,00 | 2,00 | 2,00 | 2,00 | #NULL! | #NULL! |
| 46,00 | 1,00 | 2,00 | 2,00 | 2,00 | 2,00 | 2,00 | #NULL! | #NULL! |
| 47,00 | 2,00 | 2,00 | 2,00 | 2,00 | 2,00 | 2,00 | #NULL! | #NULL! |
| 52,00 | 2,00 | 1,00 | 2,00 | 2,00 | 1,00 | 2,00 | #NULL! | #NULL! |

|       |      |      |      |      |      |      |        |        |
|-------|------|------|------|------|------|------|--------|--------|
| 55,00 | 1,00 | 1,00 | 2,00 | 2,00 | 2,00 | 2,00 | #NULL! | #NULL! |
| 70,00 | 1,00 | 1,00 | 1,00 | 1,00 | 1,00 | 2,00 | #NULL! | #NULL! |
| 74,00 | 1,00 | 1,00 | 1,00 | 1,00 | 1,00 | 2,00 | #NULL! | #NULL! |
| 45,00 | 1,00 | 2,00 | 2,00 | 2,00 | 2,00 | 2,00 | #NULL! | #NULL! |
| 75,00 | 2,00 | 2,00 | 1,00 | 2,00 | 2,00 | 2,00 | #NULL! | #NULL! |
| 52,00 | 1,00 | 1,00 | 2,00 | 2,00 | 2,00 | 2,00 | #NULL! | #NULL! |
| 51,00 | 2,00 | 1,00 | 2,00 | 2,00 | 2,00 | 2,00 | #NULL! | #NULL! |
| 49,00 | 2,00 | 2,00 | 2,00 | 2,00 | 2,00 | 2,00 | #NULL! | #NULL! |
| 50,00 | 1,00 | 1,00 | 2,00 | 2,00 | 2,00 | 2,00 | #NULL! | #NULL! |
| 49,00 | 1,00 | 1,00 | 1,00 | 2,00 | 2,00 | 2,00 | #NULL! | #NULL! |
| 48,00 | 2,00 | 1,00 | 1,00 | 2,00 | 2,00 | 2,00 | #NULL! | #NULL! |
| 49,00 | 2,00 | 1,00 | 1,00 | 2,00 | 2,00 | 2,00 | #NULL! | #NULL! |
| 50,00 | 1,00 | 1,00 | 1,00 | 2,00 | 2,00 | 2,00 | #NULL! | #NULL! |
| 50,00 | 2,00 | 2,00 | 1,00 | 2,00 | 2,00 | 2,00 | #NULL! | #NULL! |
| 51,00 | 1,00 | 2,00 | 2,00 | 2,00 | 2,00 | 2,00 | #NULL! | #NULL! |
| 49,00 | 2,00 | 1,00 | 1,00 | 2,00 | 2,00 | 2,00 | #NULL! | #NULL! |
| 50,00 | 1,00 | 2,00 | 1,00 | 2,00 | 2,00 | 2,00 | #NULL! | #NULL! |
| 48,00 | 2,00 | 1,00 | 2,00 | 2,00 | 2,00 | 2,00 | #NULL! | #NULL! |
| 49,00 | 1,00 | 2,00 | 1,00 | 2,00 | 2,00 | 2,00 | #NULL! | #NULL! |
| 49,00 | 2,00 | 1,00 | 1,00 | 2,00 | 2,00 | 2,00 | #NULL! | #NULL! |
| 50,00 | 1,00 | 1,00 | 1,00 | 2,00 | 2,00 | 2,00 | #NULL! | #NULL! |
| 70,00 | 2,00 | 2,00 | 1,00 | 2,00 | 2,00 | 2,00 | #NULL! | #NULL! |
| 76,00 | 1,00 | 1,00 | 2,00 | 2,00 | 2,00 | 2,00 | #NULL! | #NULL! |
| 50,00 | 2,00 | 2,00 | 2,00 | 2,00 | 2,00 | 2,00 | #NULL! | #NULL! |
| 48,00 | 2,00 | 2,00 | 2,00 | 2,00 | 2,00 | 2,00 | #NULL! | #NULL! |
| 50,00 | 1,00 | 2,00 | 2,00 | 2,00 | 2,00 | 2,00 | #NULL! | #NULL! |
| 57,00 | 1,00 | 2,00 | 2,00 | 2,00 | 2,00 | 1,00 | 40,00  | #NULL! |
| 46,00 | 2,00 | 2,00 | 2,00 | 2,00 | 2,00 | 2,00 | #NULL! | #NULL! |
| 49,00 | 2,00 | 1,00 | 2,00 | 2,00 | 2,00 | 2,00 | #NULL! | #NULL! |
| 67,00 | 2,00 | 1,00 | 1,00 | 2,00 | 1,00 | 2,00 | #NULL! | #NULL! |
| 48,00 | 1,00 | 1,00 | 2,00 | 2,00 | 2,00 | 2,00 | #NULL! | #NULL! |
| 60,00 | 1,00 | 2,00 | 1,00 | 2,00 | 2,00 | 2,00 | #NULL! | #NULL! |
| 52,00 | 2,00 | 1,00 | 2,00 | 2,00 | 2,00 | 2,00 | #NULL! | #NULL! |
| 62,00 | 2,00 | 1,00 | 1,00 | 2,00 | 2,00 | 2,00 | #NULL! | #NULL! |
| 63,00 | 1,00 | 1,00 | 1,00 | 2,00 | 2,00 | 1,00 | 45,00  | #NULL! |
| 63,00 | 1,00 | 1,00 | 1,00 | 2,00 | 1,00 | 1,00 | 47,00  | #NULL! |
| 62,00 | 1,00 | 2,00 | 2,00 | 2,00 | 1,00 | 1,00 | 30,00  | #NULL! |
| 73,00 | 2,00 | 1,00 | 2,00 | 2,00 | 2,00 | 2,00 | #NULL! | #NULL! |
| 77,00 | 2,00 | 1,00 | 2,00 | 1,00 | 1,00 | 2,00 | #NULL! | #NULL! |
| 59,00 | 2,00 | 2,00 | 2,00 | 2,00 | 1,00 | 2,00 | #NULL! | #NULL! |
| 85,00 | 2,00 | 1,00 | 1,00 | 1,00 | 2,00 | 2,00 | #NULL! | #NULL! |
| 49,00 | 1,00 | 2,00 | 2,00 | 2,00 | 2,00 | 1,00 | 20,00  | #NULL! |
| 50,00 | 2,00 | 1,00 | 2,00 | 2,00 | 2,00 | 1,00 | 30,00  | #NULL! |
| 45,00 | 1,00 | 2,00 | 2,00 | 2,00 | 2,00 | 2,00 | #NULL! | #NULL! |
| 46,00 | 1,00 | 2,00 | 2,00 | 2,00 | 2,00 | 2,00 | #NULL! | #NULL! |
| 49,00 | 1,00 | 1,00 | 2,00 | 2,00 | 1,00 | 1,00 | 20,00  | #NULL! |
| 50,00 | 2,00 | 1,00 | 1,00 | 2,00 | 2,00 | 2,00 | #NULL! | #NULL! |
| 48,00 | 1,00 | 1,00 | 1,00 | 2,00 | 2,00 | 2,00 | #NULL! | #NULL! |
| 49,00 | 2,00 | 1,00 | 2,00 | 2,00 | 1,00 | 2,00 | #NULL! | #NULL! |
| 48,00 | 1,00 | 2,00 | 2,00 | 2,00 | 2,00 | 1,00 | 20,00  | #NULL! |

|       |      |      |      |      |      |      |        |        |
|-------|------|------|------|------|------|------|--------|--------|
| 50,00 | 2,00 | 1,00 | 2,00 | 2,00 | 2,00 | 1,00 | 16,00  | #NULL! |
| 47,00 | 1,00 | 2,00 | 2,00 | 2,00 | 2,00 | 2,00 | #NULL! | #NULL! |
| 46,00 | 2,00 | 1,00 | 2,00 | 2,00 | 2,00 | 2,00 | #NULL! | #NULL! |
| 48,00 | 2,00 | 2,00 | 2,00 | 2,00 | 2,00 | 2,00 | #NULL! | #NULL! |
| 49,00 | 1,00 | 2,00 | 2,00 | 2,00 | 2,00 | 2,00 | #NULL! | #NULL! |
| 64,00 | 1,00 | 2,00 | 2,00 | 2,00 | 2,00 | 2,00 | #NULL! | #NULL! |
| 46,00 | 2,00 | 2,00 | 2,00 | 2,00 | 2,00 | 1,00 | 20,00  | #NULL! |
| 49,00 | 2,00 | 1,00 | 2,00 | 2,00 | 2,00 | 2,00 | #NULL! | #NULL! |
| 50,00 | 1,00 | 1,00 | 2,00 | 2,00 | 2,00 | 2,00 | #NULL! | #NULL! |
| 49,00 | 2,00 | 1,00 | 2,00 | 2,00 | 1,00 | 2,00 | #NULL! | #NULL! |
| 48,00 | 1,00 | 1,00 | 1,00 | 2,00 | 2,00 | 2,00 | #NULL! | #NULL! |
| 78,00 | 2,00 | 1,00 | 2,00 | 2,00 | 2,00 | 2,00 | #NULL! | #NULL! |
| 78,00 | 1,00 | 1,00 | 2,00 | 2,00 | 2,00 | 2,00 | #NULL! | #NULL! |
| 46,00 | 1,00 | 2,00 | 2,00 | 2,00 | 2,00 | 2,00 | #NULL! | #NULL! |
| 51,00 | 1,00 | 2,00 | 2,00 | 2,00 | 2,00 | 2,00 | #NULL! | #NULL! |
| 65,00 | 2,00 | 2,00 | 2,00 | 2,00 | 2,00 | 2,00 | #NULL! | #NULL! |
| 80,00 | 1,00 | 2,00 | 2,00 | 1,00 | 1,00 | 1,00 | 65,00  | #NULL! |
| 49,00 | 2,00 | 2,00 | 1,00 | 2,00 | 2,00 | 2,00 | #NULL! | #NULL! |
| 53,00 | 1,00 | 2,00 | 2,00 | 1,00 | 1,00 | 2,00 | #NULL! | #NULL! |
| 50,00 | 2,00 | 1,00 | 2,00 | 2,00 | 2,00 | 2,00 | #NULL! | #NULL! |
| 46,00 | 2,00 | 2,00 | 2,00 | 2,00 | 2,00 | 2,00 | #NULL! | #NULL! |
| 50,00 | 2,00 | 2,00 | 2,00 | 2,00 | 2,00 | 1,00 | 10,00  | #NULL! |
| 53,00 | 1,00 | 2,00 | 2,00 | 2,00 | 2,00 | 2,00 | #NULL! | #NULL! |
| 45,00 | 2,00 | 2,00 | 2,00 | 2,00 | 2,00 | 2,00 | #NULL! | #NULL! |
| 50,00 | 1,00 | 2,00 | 2,00 | 2,00 | 2,00 | 2,00 | #NULL! | #NULL! |
| 55,00 | 1,00 | 2,00 | 1,00 | 2,00 | 2,00 | 2,00 | #NULL! | #NULL! |
| 50,00 | 2,00 | 2,00 | 2,00 | 2,00 | 2,00 | 2,00 | #NULL! | #NULL! |
| 45,00 | 2,00 | 2,00 | 2,00 | 2,00 | 2,00 | 2,00 | #NULL! | #NULL! |
| 50,00 | 2,00 | 2,00 | 2,00 | 2,00 | 2,00 | 2,00 | #NULL! | #NULL! |
| 50,00 | 2,00 | 2,00 | 2,00 | 2,00 | 1,00 | 1,00 | 30,00  | #NULL! |
| 55,00 | 1,00 | 2,00 | 2,00 | 2,00 | 2,00 | 2,00 | #NULL! | #NULL! |
| 50,00 | 1,00 | 2,00 | 2,00 | 2,00 | 2,00 | 1,00 | 15,00  | #NULL! |
| 45,00 | 2,00 | 2,00 | 2,00 | 2,00 | 2,00 | 2,00 | #NULL! | #NULL! |
| 45,00 | 2,00 | 2,00 | 2,00 | 2,00 | 2,00 | 2,00 | #NULL! | #NULL! |
| 55,00 | 1,00 | 2,00 | 2,00 | 2,00 | 2,00 | 2,00 | #NULL! | #NULL! |
| 48,00 | 2,00 | 2,00 | 2,00 | 2,00 | 2,00 | 2,00 | #NULL! | #NULL! |
| 45,00 | 1,00 | 2,00 | 2,00 | 2,00 | 2,00 | 2,00 | #NULL! | #NULL! |
| 50,00 | 1,00 | 2,00 | 2,00 | 2,00 | 2,00 | 2,00 | #NULL! | #NULL! |
| 48,00 | 2,00 | 2,00 | 2,00 | 2,00 | 2,00 | 2,00 | #NULL! | #NULL! |
| 45,00 | 2,00 | 1,00 | 2,00 | 2,00 | 2,00 | 1,00 | 10,00  | #NULL! |
| 48,00 | 1,00 | 2,00 | 2,00 | 2,00 | 2,00 | 2,00 | #NULL! | #NULL! |
| 50,00 | 2,00 | 2,00 | 2,00 | 2,00 | 2,00 | 2,00 | #NULL! | #NULL! |
| 58,00 | 1,00 | 2,00 | 2,00 | 2,00 | 2,00 | 2,00 | #NULL! | #NULL! |
| 51,00 | 1,00 | 2,00 | 2,00 | 2,00 | 2,00 | 2,00 | #NULL! | #NULL! |
| 55,00 | 1,00 | 2,00 | 1,00 | 2,00 | 2,00 | 2,00 | #NULL! | #NULL! |
| 55,00 | 1,00 | 2,00 | 2,00 | 2,00 | 2,00 | 2,00 | #NULL! | #NULL! |
| 50,00 | 2,00 | 2,00 | 2,00 | 2,00 | 2,00 | 2,00 | #NULL! | #NULL! |
| 55,00 | 2,00 | 2,00 | 2,00 | 2,00 | 1,00 | 2,00 | #NULL! | #NULL! |
| 82,00 | 1,00 | 1,00 | 2,00 | 1,00 | 2,00 | 2,00 | #NULL! | #NULL! |
| 75,00 | 2,00 | 1,00 | 1,00 | 1,00 | 1,00 | 2,00 | #NULL! | #NULL! |

|       |      |      |      |      |      |      |        |        |
|-------|------|------|------|------|------|------|--------|--------|
| 70,00 | 2,00 | 1,00 | 2,00 | 2,00 | 1,00 | 2,00 | #NULL! | #NULL! |
| 85,00 | 2,00 | 1,00 | 1,00 | 2,00 | 1,00 | 2,00 | #NULL! | #NULL! |
| 75,00 | 1,00 | 2,00 | 2,00 | 2,00 | 2,00 | 2,00 | #NULL! | #NULL! |
| 54,00 | 2,00 | 2,00 | 2,00 | 2,00 | 2,00 | 2,00 | #NULL! | #NULL! |
| 54,00 | 1,00 | 2,00 | 2,00 | 2,00 | 2,00 | 2,00 | #NULL! | #NULL! |
| 51,00 | 2,00 | 1,00 | 1,00 | 1,00 | 1,00 | 2,00 | #NULL! | #NULL! |
| 65,00 | 1,00 | 2,00 | 1,00 | 2,00 | 1,00 | 2,00 | #NULL! | #NULL! |
| 52,00 | 1,00 | 2,00 | 2,00 | 2,00 | 2,00 | 2,00 | #NULL! | #NULL! |
| 76,00 | 1,00 | 2,00 | 2,00 | 2,00 | 2,00 | 2,00 | #NULL! | #NULL! |
| 65,00 | 2,00 | 2,00 | 2,00 | 2,00 | 2,00 | 2,00 | #NULL! | #NULL! |
| 62,00 | 1,00 | 2,00 | 2,00 | 2,00 | 1,00 | 2,00 | #NULL! | #NULL! |
| 46,00 | 1,00 | 2,00 | 2,00 | 2,00 | 2,00 | 2,00 | #NULL! | #NULL! |
| 50,00 | 1,00 | 1,00 | 1,00 | 2,00 | 2,00 | 2,00 | #NULL! | #NULL! |
| 56,00 | 1,00 | 2,00 | 2,00 | 2,00 | 2,00 | 1,00 | 60,00  | #NULL! |
| 66,00 | 2,00 | 2,00 | 2,00 | 2,00 | 2,00 | 2,00 | #NULL! | #NULL! |
| 53,00 | 1,00 | 2,00 | 2,00 | 2,00 | 2,00 | 1,00 | 12,00  | #NULL! |
| 52,00 | 2,00 | 2,00 | 2,00 | 2,00 | 2,00 | 2,00 | #NULL! | #NULL! |
| 57,00 | 1,00 | 2,00 | 2,00 | 2,00 | 2,00 | 1,00 | 20,00  | #NULL! |
| 54,00 | 2,00 | 2,00 | 2,00 | 2,00 | 2,00 | 2,00 | #NULL! | #NULL! |
| 45,00 | 1,00 | 2,00 | 2,00 | 2,00 | 2,00 | 1,00 | 25,00  | #NULL! |
| 53,00 | 2,00 | 2,00 | 2,00 | 2,00 | 2,00 | 2,00 | #NULL! | #NULL! |
| 45,00 | 1,00 | 2,00 | 2,00 | 2,00 | 2,00 | 1,00 | 20,00  | #NULL! |
| 48,00 | 2,00 | 2,00 | 2,00 | 2,00 | 2,00 | 2,00 | #NULL! | #NULL! |
| 51,00 | 2,00 | 2,00 | 2,00 | 2,00 | 2,00 | 2,00 | #NULL! | #NULL! |
| 55,00 | 1,00 | 2,00 | 2,00 | 2,00 | 2,00 | 2,00 | #NULL! | #NULL! |
| 50,00 | 2,00 | 2,00 | 2,00 | 2,00 | 2,00 | 2,00 | #NULL! | #NULL! |
| 55,00 | 1,00 | 2,00 | 2,00 | 2,00 | 2,00 | 2,00 | #NULL! | #NULL! |
| 45,00 | 2,00 | 2,00 | 2,00 | 2,00 | 2,00 | 2,00 | #NULL! | #NULL! |
| 47,00 | 2,00 | 2,00 | 2,00 | 2,00 | 2,00 | 2,00 | #NULL! | #NULL! |
| 85,00 | 1,00 | 2,00 | 2,00 | 2,00 | 2,00 | 2,00 | #NULL! | #NULL! |
| 89,00 | 1,00 | 1,00 | 1,00 | 1,00 | 1,00 | 2,00 | #NULL! | #NULL! |
| 81,00 | 1,00 | 1,00 | 2,00 | 2,00 | 2,00 | 2,00 | #NULL! | #NULL! |
| 71,00 | 2,00 | 1,00 | 1,00 | 1,00 | 1,00 | 2,00 | #NULL! | #NULL! |
| 84,00 | 2,00 | 1,00 | 2,00 | 1,00 | 2,00 | 2,00 | #NULL! | #NULL! |
| 90,00 | 1,00 | 1,00 | 2,00 | 2,00 | 2,00 | 2,00 | #NULL! | #NULL! |
| 77,00 | 1,00 | 1,00 | 2,00 | 1,00 | 2,00 | 2,00 | #NULL! | #NULL! |
| 90,00 | 2,00 | 1,00 | 2,00 | 2,00 | 1,00 | 2,00 | #NULL! | #NULL! |
| 54,00 | 2,00 | 2,00 | 2,00 | 2,00 | 2,00 | 2,00 | #NULL! | #NULL! |
| 74,00 | 1,00 | 1,00 | 2,00 | 2,00 | 2,00 | 2,00 | 50,00  | 2,00   |
| 45,00 | 2,00 | 1,00 | 1,00 | 2,00 | 1,00 | 2,00 | #NULL! | #NULL! |
| 64,00 | 1,00 | 1,00 | 2,00 | 2,00 | 2,00 | 1,00 | 15,00  | #NULL! |
| 89,00 | 1,00 | 2,00 | 2,00 | 2,00 | 2,00 | 2,00 | #NULL! | #NULL! |
| 75,00 | 2,00 | 1,00 | 2,00 | 2,00 | 2,00 | 2,00 | #NULL! | #NULL! |
| 54,00 | 2,00 | 2,00 | 2,00 | 2,00 | 2,00 | 1,00 | 4,00   | #NULL! |
| 46,00 | 1,00 | 1,00 | 2,00 | 2,00 | 2,00 | 2,00 | #NULL! | #NULL! |
| 47,00 | 2,00 | 2,00 | 2,00 | 2,00 | 2,00 | 2,00 | #NULL! | #NULL! |
| 53,00 | 1,00 | 2,00 | 1,00 | 2,00 | 2,00 | 2,00 | #NULL! | #NULL! |
| 45,00 | 2,00 | 2,00 | 2,00 | 2,00 | 2,00 | 2,00 | #NULL! | #NULL! |
| 59,00 | 1,00 | 1,00 | 2,00 | 2,00 | 2,00 | 2,00 | #NULL! | #NULL! |
| 55,00 | 2,00 | 1,00 | 2,00 | 2,00 | 2,00 | 2,00 | #NULL! | #NULL! |



|       |      |      |      |      |      |      |        |        |
|-------|------|------|------|------|------|------|--------|--------|
| 60,00 | 1,00 | 2,00 | 2,00 | 2,00 | 2,00 | 2,00 | #NULL! | #NULL! |
| 55,00 | 2,00 | 2,00 | 2,00 | 2,00 | 2,00 | 2,00 | #NULL! | #NULL! |
| 66,00 | 1,00 | 1,00 | 1,00 | 2,00 | 2,00 | 2,00 | 20,00  | 5,00   |
| 75,00 | 1,00 | 1,00 | 2,00 | 1,00 | 1,00 | 2,00 | 40,00  | 7,00   |
| 76,00 | 1,00 | 2,00 | 2,00 | 2,00 | 2,00 | 2,00 | 30,00  | 35,00  |
| 50,00 | 2,00 | 1,00 | 1,00 | 1,00 | 2,00 | 2,00 | #NULL! | #NULL! |
| 84,00 | 1,00 | 1,00 | 2,00 | 1,00 | 2,00 | 2,00 | #NULL! | #NULL! |
| 76,00 | 2,00 | 1,00 | 2,00 | 2,00 | 2,00 | 2,00 | #NULL! | #NULL! |
| 64,00 | 2,00 | 1,00 | 1,00 | 2,00 | 1,00 | 2,00 | #NULL! | #NULL! |
| 76,00 | 1,00 | 1,00 | 2,00 | 2,00 | 2,00 | 2,00 | #NULL! | #NULL! |
| 75,00 | 1,00 | 1,00 | 2,00 | 2,00 | 2,00 | 2,00 | #NULL! | #NULL! |
| 70,00 | 2,00 | 1,00 | 1,00 | 2,00 | 1,00 | 2,00 | #NULL! | #NULL! |
| 51,00 | 2,00 | 1,00 | 2,00 | 1,00 | 1,00 | 1,00 | 12,00  | #NULL! |
| 79,00 | 2,00 | 1,00 | 1,00 | 1,00 | 1,00 | 2,00 | #NULL! | #NULL! |
| 86,00 | 2,00 | 2,00 | 2,00 | 2,00 | 2,00 | 2,00 | #NULL! | #NULL! |
| 76,00 | 2,00 | 1,00 | 2,00 | 2,00 | 2,00 | 2,00 | #NULL! | #NULL! |
| 51,00 | 1,00 | 1,00 | 2,00 | 2,00 | 2,00 | 2,00 | #NULL! | #NULL! |
| 46,00 | 1,00 | 1,00 | 2,00 | 2,00 | 2,00 | 2,00 | #NULL! | #NULL! |
| 58,00 | 1,00 | 2,00 | 2,00 | 1,00 | 1,00 | 2,00 | #NULL! | #NULL! |
| 56,00 | 2,00 | 2,00 | 2,00 | 2,00 | 1,00 | 2,00 | #NULL! | #NULL! |
| 49,00 | 2,00 | 1,00 | 2,00 | 2,00 | 2,00 | 2,00 | #NULL! | #NULL! |
| 56,00 | 2,00 | 1,00 | 2,00 | 2,00 | 2,00 | 2,00 | #NULL! | #NULL! |
| 50,00 | 1,00 | 2,00 | 2,00 | 2,00 | 2,00 | 2,00 | #NULL! | #NULL! |
| 48,00 | 2,00 | 2,00 | 2,00 | 2,00 | 2,00 | 2,00 | #NULL! | #NULL! |
| 45,00 | 2,00 | 2,00 | 2,00 | 2,00 | 2,00 | 2,00 | #NULL! | #NULL! |
| 47,00 | 1,00 | 2,00 | 2,00 | 2,00 | 2,00 | 1,00 | 25,00  | #NULL! |
| 49,00 | 1,00 | 2,00 | 2,00 | 2,00 | 2,00 | 2,00 | #NULL! | #NULL! |
| 46,00 | 2,00 | 2,00 | 2,00 | 2,00 | 2,00 | 2,00 | #NULL! | #NULL! |
| 48,00 | 2,00 | 2,00 | 2,00 | 2,00 | 2,00 | 2,00 | #NULL! | #NULL! |
| 45,00 | 1,00 | 2,00 | 2,00 | 2,00 | 2,00 | 2,00 | #NULL! | #NULL! |
| 50,00 | 1,00 | 1,00 | 1,00 | 2,00 | 2,00 | 2,00 | #NULL! | #NULL! |
| 55,00 | 1,00 | 1,00 | 1,00 | 2,00 | 2,00 | 2,00 | #NULL! | #NULL! |
| 45,00 | 1,00 | 2,00 | 2,00 | 2,00 | 2,00 | 2,00 | #NULL! | #NULL! |
| 47,00 | 2,00 | 2,00 | 2,00 | 2,00 | 2,00 | 2,00 | #NULL! | #NULL! |
| 74,00 | 1,00 | 1,00 | 2,00 | 2,00 | 2,00 | 2,00 | #NULL! | #NULL! |
| 77,00 | 1,00 | 1,00 | 2,00 | 2,00 | 1,00 | 2,00 | #NULL! | #NULL! |
| 76,00 | 1,00 | 1,00 | 2,00 | 2,00 | 1,00 | 2,00 | #NULL! | #NULL! |
| 72,00 | 1,00 | 1,00 | 2,00 | 2,00 | 2,00 | 2,00 | #NULL! | #NULL! |
| 74,00 | 1,00 | 1,00 | 2,00 | 2,00 | 2,00 | 2,00 | #NULL! | #NULL! |
| 80,00 | 1,00 | 1,00 | 1,00 | 2,00 | 1,00 | 2,00 | #NULL! | #NULL! |
| 87,00 | 1,00 | 2,00 | 2,00 | 1,00 | 1,00 | 1,00 | 62,00  | #NULL! |
| 62,00 | 1,00 | 1,00 | 1,00 | 2,00 | 2,00 | 2,00 | #NULL! | #NULL! |
| 49,00 | 2,00 | 2,00 | 2,00 | 2,00 | 2,00 | 2,00 | #NULL! | #NULL! |
| 48,00 | 1,00 | 2,00 | 2,00 | 2,00 | 2,00 | 2,00 | #NULL! | #NULL! |
| 53,00 | 1,00 | 2,00 | 2,00 | 2,00 | 2,00 | 1,00 | 20,00  | #NULL! |
| 45,00 | 2,00 | 2,00 | 2,00 | 2,00 | 2,00 | 2,00 | #NULL! | #NULL! |
| 50,00 | 1,00 | 1,00 | 2,00 | 2,00 | 2,00 | 2,00 | #NULL! | #NULL! |
| 50,00 | 1,00 | 1,00 | 2,00 | 2,00 | 2,00 | 2,00 | #NULL! | #NULL! |
| 45,00 | 2,00 | 2,00 | 2,00 | 2,00 | 2,00 | 2,00 | #NULL! | #NULL! |
| 48,00 | 1,00 | 1,00 | 2,00 | 2,00 | 2,00 | 2,00 | #NULL! | #NULL! |

|       |      |      |      |      |      |      |        |        |
|-------|------|------|------|------|------|------|--------|--------|
| 53,00 | 1,00 | 1,00 | 1,00 | 1,00 | 1,00 | 1,00 | #NULL! | #NULL! |
| 60,00 | 1,00 | 2,00 | 2,00 | 2,00 | 2,00 | 2,00 | #NULL! | #NULL! |
| 60,00 | 1,00 | 2,00 | 2,00 | 2,00 | 2,00 | 2,00 | #NULL! | #NULL! |
| 64,00 | 2,00 | 2,00 | 2,00 | 2,00 | 2,00 | 2,00 | #NULL! | #NULL! |
| 55,00 | 1,00 | 2,00 | 2,00 | 2,00 | 2,00 | 1,00 | 25,00  | #NULL! |
| 52,00 | 1,00 | 2,00 | 2,00 | 2,00 | 2,00 | 2,00 | #NULL! | #NULL! |
| 46,00 | 1,00 | 2,00 | 2,00 | 2,00 | 2,00 | 2,00 | #NULL! | #NULL! |
| 45,00 | 1,00 | 2,00 | 2,00 | 2,00 | 2,00 | 2,00 | #NULL! | #NULL! |
| 62,00 | 1,00 | 1,00 | 2,00 | 2,00 | 1,00 | 2,00 | #NULL! | #NULL! |
| 62,00 | 1,00 | 2,00 | 2,00 | 2,00 | 1,00 | 2,00 | #NULL! | #NULL! |
| 55,00 | 1,00 | 1,00 | 1,00 | 2,00 | 2,00 | 2,00 | #NULL! | #NULL! |
| 57,00 | 1,00 | 2,00 | 2,00 | 2,00 | 2,00 | 2,00 | #NULL! | #NULL! |
| 49,00 | 1,00 | 2,00 | 2,00 | 2,00 | 2,00 | 1,00 | 15,00  | #NULL! |
| 64,00 | 1,00 | 2,00 | 2,00 | 2,00 | 1,00 | 2,00 | #NULL! | #NULL! |
| 67,00 | 1,00 | 2,00 | 2,00 | 2,00 | 2,00 | 2,00 | #NULL! | #NULL! |
| 71,00 | 1,00 | 1,00 | 2,00 | 2,00 | 2,00 | 1,00 | 40,00  | #NULL! |
| 78,00 | 1,00 | 1,00 | 1,00 | 2,00 | 2,00 | 2,00 | #NULL! | #NULL! |
| 46,00 | 1,00 | 1,00 | 1,00 | 1,00 | 1,00 | 2,00 | #NULL! | #NULL! |
| 73,00 | 1,00 | 2,00 | 1,00 | 2,00 | 2,00 | 2,00 | #NULL! | #NULL! |
| 78,00 | 1,00 | 1,00 | 2,00 | 2,00 | 2,00 | 2,00 | #NULL! | #NULL! |
| 46,00 | 1,00 | 2,00 | 2,00 | 2,00 | 2,00 | 1,00 | 20,00  | #NULL! |
| 67,00 | 1,00 | 1,00 | 1,00 | 2,00 | 1,00 | 2,00 | #NULL! | #NULL! |
| 48,00 | 1,00 | 2,00 | 2,00 | 2,00 | 2,00 | 2,00 | #NULL! | #NULL! |
| 76,00 | 1,00 | 2,00 | 2,00 | 2,00 | 2,00 | 2,00 | #NULL! | #NULL! |
| 62,00 | 1,00 | 1,00 | 1,00 | 1,00 | 1,00 | 2,00 | #NULL! | #NULL! |
| 55,00 | 1,00 | 2,00 | 2,00 | 2,00 | 2,00 | 2,00 | #NULL! | #NULL! |
| 66,00 | 1,00 | 2,00 | 2,00 | 2,00 | 2,00 | 2,00 | #NULL! | #NULL! |
| 53,00 | 1,00 | 2,00 | 2,00 | 2,00 | 2,00 | 2,00 | #NULL! | #NULL! |
| 48,00 | 1,00 | 2,00 | 2,00 | 2,00 | 1,00 | 2,00 | #NULL! | #NULL! |
| 70,00 | 2,00 | 1,00 | 2,00 | 1,00 | 1,00 | 2,00 | #NULL! | #NULL! |
| 48,00 | 2,00 | 2,00 | 2,00 | 2,00 | 2,00 | 2,00 | #NULL! | #NULL! |
| 47,00 | 1,00 | 2,00 | 2,00 | 2,00 | 2,00 | 2,00 | #NULL! | #NULL! |
| 61,00 | 2,00 | 1,00 | 2,00 | 2,00 | 2,00 | 2,00 | #NULL! | #NULL! |
| 65,00 | 1,00 | 2,00 | 2,00 | 2,00 | 2,00 | 1,00 | #NULL! | #NULL! |
| 55,00 | 2,00 | 2,00 | 2,00 | 2,00 | 2,00 | 2,00 | #NULL! | #NULL! |
| 58,00 | 1,00 | 1,00 | 2,00 | 2,00 | 2,00 | 2,00 | #NULL! | #NULL! |
| 59,00 | 1,00 | 1,00 | 2,00 | 2,00 | 2,00 | 2,00 | #NULL! | #NULL! |
| 61,00 | 1,00 | 2,00 | 2,00 | 2,00 | 2,00 | 2,00 | #NULL! | #NULL! |
| 56,00 | 1,00 | 2,00 | 2,00 | 2,00 | 1,00 | 2,00 | #NULL! | #NULL! |
| 65,00 | 2,00 | 1,00 | 2,00 | 1,00 | 1,00 | 2,00 | #NULL! | #NULL! |
| 51,00 | 1,00 | 2,00 | 2,00 | 2,00 | 2,00 | 1,00 | 15,00  | #NULL! |
| 48,00 | 1,00 | 2,00 | 2,00 | 2,00 | 2,00 | 1,00 | 16,00  | #NULL! |
| 66,00 | 2,00 | 2,00 | 2,00 | 2,00 | 2,00 | 2,00 | #NULL! | #NULL! |
| 65,00 | 2,00 | 2,00 | 1,00 | 2,00 | 2,00 | 2,00 | #NULL! | #NULL! |
| 75,00 | 2,00 | 2,00 | 2,00 | 2,00 | 2,00 | 2,00 | #NULL! | #NULL! |
| 66,00 | 1,00 | 1,00 | 2,00 | 2,00 | 1,00 | 2,00 | #NULL! | #NULL! |
| 64,00 | 2,00 | 1,00 | 2,00 | 2,00 | 1,00 | 2,00 | #NULL! | #NULL! |
| 67,00 | 2,00 | 1,00 | 1,00 | 2,00 | 1,00 | 2,00 | #NULL! | #NULL! |
| 51,00 | 1,00 | 2,00 | 2,00 | 2,00 | 2,00 | 1,00 | 22,00  | #NULL! |
| 45,00 | 2,00 | 2,00 | 2,00 | 2,00 | 2,00 | 2,00 | #NULL! | #NULL! |

|       |      |      |      |      |      |      |        |        |
|-------|------|------|------|------|------|------|--------|--------|
| 59,00 | 2,00 | 1,00 | 1,00 | 1,00 | 1,00 | 2,00 | #NULL! | #NULL! |
| 59,00 | 1,00 | 1,00 | 1,00 | 2,00 | 2,00 | 2,00 | #NULL! | #NULL! |
| 68,00 | 2,00 | 1,00 | 2,00 | 2,00 | 2,00 | 2,00 | #NULL! | #NULL! |
| 57,00 | 1,00 | 1,00 | 1,00 | 1,00 | 1,00 | 1,00 | 60,00  | #NULL! |
| 73,00 | 1,00 | 1,00 | 2,00 | 2,00 | 2,00 | 2,00 | #NULL! | #NULL! |
| 45,00 | 1,00 | 2,00 | 2,00 | 2,00 | 2,00 | 2,00 | #NULL! | #NULL! |
| 63,00 | 2,00 | 1,00 | 2,00 | 2,00 | 2,00 | 2,00 | #NULL! | #NULL! |
| 48,00 | 1,00 | 2,00 | 2,00 | 2,00 | 2,00 | 1,00 | 70,00  | #NULL! |
| 63,00 | 1,00 | 1,00 | 2,00 | 1,00 | 1,00 | 1,00 | 50,00  | #NULL! |
| 75,00 | 1,00 | 1,00 | 1,00 | 1,00 | 1,00 | 1,00 | 10,00  | 1,00   |
| 45,00 | 2,00 | 1,00 | 1,00 | 2,00 | 2,00 | 2,00 | #NULL! | #NULL! |
| 59,00 | 1,00 | 2,00 | 2,00 | 2,00 | 2,00 | 2,00 | #NULL! | #NULL! |
| 58,00 | 2,00 | 1,00 | 1,00 | 2,00 | 1,00 | 2,00 | #NULL! | #NULL! |
| 71,00 | 1,00 | 1,00 | 2,00 | 2,00 | 2,00 | 2,00 | #NULL! | #NULL! |
| 66,00 | 1,00 | 1,00 | 2,00 | 2,00 | 2,00 | 2,00 | #NULL! | #NULL! |
| 82,00 | 2,00 | 1,00 | 1,00 | 1,00 | 1,00 | 2,00 | #NULL! | #NULL! |
| 88,00 | 1,00 | 1,00 | 1,00 | 2,00 | 1,00 | 2,00 | #NULL! | #NULL! |
| 63,00 | 2,00 | 2,00 | 2,00 | 2,00 | 2,00 | 2,00 | #NULL! | #NULL! |
| 59,00 | 2,00 | 2,00 | 2,00 | 2,00 | 1,00 | 1,00 | 19,00  | #NULL! |
| 47,00 | 2,00 | 2,00 | 2,00 | 2,00 | 2,00 | 2,00 | #NULL! | #NULL! |
| 46,00 | 1,00 | 2,00 | 2,00 | 2,00 | 2,00 | 2,00 | #NULL! | #NULL! |
| 84,00 | 1,00 | 1,00 | 2,00 | 1,00 | 1,00 | 2,00 | #NULL! | #NULL! |
| 65,00 | 1,00 | 2,00 | 1,00 | 2,00 | 1,00 | 2,00 | #NULL! | #NULL! |
| 52,00 | 2,00 | 1,00 | 2,00 | 2,00 | 2,00 | 2,00 | #NULL! | #NULL! |
| 48,00 | 1,00 | 2,00 | 2,00 | 2,00 | 2,00 | 2,00 | #NULL! | #NULL! |
| 66,00 | 1,00 | 1,00 | 1,00 | 1,00 | 1,00 | 2,00 | #NULL! | #NULL! |
| 84,00 | 2,00 | 1,00 | 1,00 | 2,00 | 2,00 | 2,00 | #NULL! | #NULL! |
| 51,00 | 2,00 | 2,00 | 2,00 | 2,00 | 1,00 | 2,00 | #NULL! | #NULL! |
| 57,00 | 2,00 | 1,00 | 2,00 | 2,00 | 2,00 | 2,00 | #NULL! | #NULL! |
| 74,00 | 2,00 | 2,00 | 2,00 | 2,00 | 2,00 | 2,00 | 50,00  | 5,00   |
| 80,00 | 1,00 | 1,00 | 1,00 | 2,00 | 1,00 | 2,00 | #NULL! | #NULL! |
| 70,00 | 2,00 | 1,00 | 1,00 | 2,00 | 1,00 | 2,00 | #NULL! | #NULL! |
| 57,00 | 2,00 | 1,00 | 1,00 | 2,00 | 1,00 | 2,00 | #NULL! | #NULL! |
| 55,00 | 2,00 | 2,00 | 2,00 | 2,00 | 1,00 | 2,00 | 25,00  | 10,00  |
| 77,00 | 2,00 | 1,00 | 1,00 | 1,00 | 2,00 | 2,00 | #NULL! | #NULL! |
| 80,00 | 1,00 | 2,00 | 2,00 | 2,00 | 2,00 | 2,00 | #NULL! | #NULL! |
| 74,00 | 2,00 | 1,00 | 2,00 | 2,00 | 1,00 | 2,00 | #NULL! | #NULL! |
| 56,00 | 2,00 | 2,00 | 2,00 | 2,00 | 1,00 | 2,00 | #NULL! | #NULL! |
| 55,00 | 1,00 | 2,00 | 2,00 | 2,00 | 2,00 | 2,00 | #NULL! | #NULL! |
| 51,00 | 2,00 | 1,00 | 1,00 | 1,00 | 2,00 | 2,00 | #NULL! | #NULL! |
| 65,00 | 2,00 | 2,00 | 2,00 | 1,00 | 2,00 | 2,00 | #NULL! | #NULL! |
| 48,00 | 2,00 | 2,00 | 2,00 | 2,00 | 1,00 | 1,00 | 3,00   | #NULL! |
| 48,00 | 2,00 | 1,00 | 2,00 | 1,00 | 1,00 | 1,00 | 20,00  | #NULL! |
| 45,00 | 1,00 | 1,00 | 2,00 | 2,00 | 2,00 | 2,00 | #NULL! | #NULL! |
| 47,00 | 2,00 | 2,00 | 2,00 | 2,00 | 2,00 | 2,00 | #NULL! | #NULL! |
| 51,00 | 2,00 | 1,00 | 2,00 | 2,00 | 1,00 | 2,00 | #NULL! | #NULL! |
| 46,00 | 1,00 | 2,00 | 2,00 | 2,00 | 2,00 | 1,00 | 10,00  | #NULL! |
| 63,00 | 1,00 | 1,00 | 2,00 | 1,00 | 1,00 | 2,00 | #NULL! | #NULL! |
| 60,00 | 2,00 | 1,00 | 2,00 | 2,00 | 2,00 | 2,00 | #NULL! | #NULL! |
| 56,00 | 1,00 | 1,00 | 2,00 | 2,00 | 2,00 | 1,00 | 50,00  | #NULL! |

|       |      |      |      |      |      |      |        |        |
|-------|------|------|------|------|------|------|--------|--------|
| 47,00 | 2,00 | 2,00 | 2,00 | 2,00 | 2,00 | 2,00 | #NULL! | #NULL! |
| 65,00 | 2,00 | 1,00 | 2,00 | 1,00 | 1,00 | 2,00 | #NULL! | #NULL! |
| 75,00 | 1,00 | 2,00 | 2,00 | 2,00 | 2,00 | 2,00 | #NULL! | #NULL! |
| 51,00 | 1,00 | 2,00 | 2,00 | 2,00 | 1,00 | 2,00 | #NULL! | #NULL! |
| 45,00 | 2,00 | 1,00 | 1,00 | 2,00 | 2,00 | 2,00 | #NULL! | #NULL! |
| 50,00 | 1,00 | 2,00 | 2,00 | 2,00 | 2,00 | 2,00 | #NULL! | #NULL! |
| 59,00 | 1,00 | 2,00 | 2,00 | 2,00 | 2,00 | 2,00 | #NULL! | #NULL! |
| 56,00 | 2,00 | 1,00 | 2,00 | 1,00 | 1,00 | 2,00 | #NULL! | #NULL! |
| 68,00 | 1,00 | 2,00 | 2,00 | 2,00 | 2,00 | 2,00 | #NULL! | #NULL! |
| 52,00 | 1,00 | 2,00 | 2,00 | 2,00 | 2,00 | 1,00 | 28,00  | #NULL! |
| 80,00 | 1,00 | 1,00 | 2,00 | 1,00 | 1,00 | 1,00 | 52,00  | #NULL! |
| 76,00 | 2,00 | 1,00 | 1,00 | 2,00 | 1,00 | 2,00 | #NULL! | #NULL! |
| 50,00 | 2,00 | 1,00 | 2,00 | 2,00 | 2,00 | 2,00 | #NULL! | #NULL! |
| 47,00 | 1,00 | 2,00 | 2,00 | 2,00 | 2,00 | 1,00 | 22,00  | #NULL! |
| 45,00 | 2,00 | 1,00 | 2,00 | 2,00 | 2,00 | 2,00 | #NULL! | #NULL! |
| 68,00 | 2,00 | 1,00 | 1,00 | 2,00 | 1,00 | 2,00 | #NULL! | #NULL! |
| 54,00 | 1,00 | 2,00 | 2,00 | 2,00 | 2,00 | 2,00 | #NULL! | #NULL! |
| 64,00 | 1,00 | 2,00 | 2,00 | 2,00 | 2,00 | 2,00 | #NULL! | #NULL! |
| 60,00 | 2,00 | 1,00 | 1,00 | 2,00 | 2,00 | 2,00 | #NULL! | #NULL! |
| 69,00 | 1,00 | 2,00 | 2,00 | 1,00 | 2,00 | 1,00 | 45,00  | #NULL! |
| 72,00 | 2,00 | 1,00 | 1,00 | 2,00 | 2,00 | 2,00 | #NULL! | #NULL! |
| 52,00 | 1,00 | 1,00 | 2,00 | 2,00 | 2,00 | 1,00 | 15,00  | #NULL! |
| 45,00 | 1,00 | 2,00 | 2,00 | 2,00 | 2,00 | 2,00 | #NULL! | #NULL! |
| 65,00 | 1,00 | 2,00 | 2,00 | 2,00 | 2,00 | 2,00 | #NULL! | #NULL! |
| 52,00 | 1,00 | 2,00 | 2,00 | 2,00 | 2,00 | 2,00 | #NULL! | #NULL! |
| 50,00 | 1,00 | 1,00 | 1,00 | 2,00 | 1,00 | 2,00 | #NULL! | #NULL! |
| 65,00 | 2,00 | 1,00 | 1,00 | 2,00 | 1,00 | 1,00 | 30,00  | #NULL! |
| 66,00 | 1,00 | 2,00 | 2,00 | 2,00 | 2,00 | 1,00 | 25,00  | #NULL! |
| 60,00 | 2,00 | 1,00 | 2,00 | 2,00 | 2,00 | 2,00 | #NULL! | #NULL! |
| 54,00 | 1,00 | 1,00 | 2,00 | 2,00 | 2,00 | 1,00 | 35,00  | #NULL! |
| 64,00 | 2,00 | 1,00 | 1,00 | 2,00 | 2,00 | 2,00 | #NULL! | #NULL! |
| 54,00 | 1,00 | 2,00 | 2,00 | 2,00 | 2,00 | 2,00 | #NULL! | #NULL! |
| 76,00 | 2,00 | 2,00 | 2,00 | 2,00 | 2,00 | 2,00 | #NULL! | #NULL! |
| 78,00 | 1,00 | 2,00 | 1,00 | 1,00 | 1,00 | 1,00 | 30,00  | #NULL! |
| 81,00 | 2,00 | 1,00 | 2,00 | 2,00 | 2,00 | 2,00 | #NULL! | #NULL! |
| 57,00 | 1,00 | 2,00 | 1,00 | 2,00 | 2,00 | 2,00 | #NULL! | #NULL! |
| 45,00 | 2,00 | 2,00 | 2,00 | 2,00 | 2,00 | 2,00 | #NULL! | #NULL! |
| 49,00 | 1,00 | 1,00 | 2,00 | 1,00 | 1,00 | 1,00 | 30,00  | #NULL! |
| 50,00 | 2,00 | 1,00 | 1,00 | 2,00 | 1,00 | 2,00 | #NULL! | #NULL! |
| 54,00 | 1,00 | 2,00 | 2,00 | 2,00 | 2,00 | 1,00 | 15,00  | #NULL! |
| 56,00 | 1,00 | 2,00 | 2,00 | 2,00 | 2,00 | 1,00 | 30,00  | #NULL! |
| 87,00 | 1,00 | 1,00 | 2,00 | 1,00 | 2,00 | 2,00 | #NULL! | #NULL! |
| 80,00 | 1,00 | 1,00 | 2,00 | 1,00 | 2,00 | 2,00 | #NULL! | #NULL! |
| 48,00 | 2,00 | 2,00 | 2,00 | 2,00 | 2,00 | 1,00 | 15,00  | #NULL! |
| 60,00 | 2,00 | 1,00 | 2,00 | 2,00 | 2,00 | 1,00 | 40,00  | #NULL! |
| 46,00 | 1,00 | 1,00 | 2,00 | 2,00 | 1,00 | 2,00 | #NULL! | #NULL! |
| 49,00 | 1,00 | 1,00 | 1,00 | 2,00 | 2,00 | 2,00 | #NULL! | #NULL! |
| 49,00 | 2,00 | 1,00 | 1,00 | 2,00 | 2,00 | 1,00 | 15,00  | #NULL! |
| 49,00 | 1,00 | 1,00 | 1,00 | 2,00 | 2,00 | 2,00 | #NULL! | #NULL! |
| 56,00 | 2,00 | 1,00 | 2,00 | 1,00 | 2,00 | 2,00 | #NULL! | #NULL! |











|       |      |      |      |      |      |      |        |        |
|-------|------|------|------|------|------|------|--------|--------|
| 60,00 | 1,00 | 2,00 | 2,00 | 2,00 | 2,00 | 2,00 | #NULL! | #NULL! |
| 45,00 | 2,00 | 2,00 | 2,00 | 2,00 | 2,00 | 2,00 | #NULL! | #NULL! |
| 56,00 | 1,00 | 2,00 | 2,00 | 2,00 | 2,00 | 2,00 | #NULL! | #NULL! |
| 80,00 | 2,00 | 2,00 | 2,00 | 2,00 | 2,00 | 2,00 | #NULL! | #NULL! |
| 61,00 | 1,00 | 2,00 | 2,00 | 2,00 | 2,00 | 2,00 | #NULL! | #NULL! |
| 59,00 | 2,00 | 2,00 | 2,00 | 2,00 | 2,00 | 2,00 | #NULL! | #NULL! |
| 45,00 | 1,00 | 2,00 | 2,00 | 2,00 | 2,00 | 2,00 | #NULL! | #NULL! |
| 53,00 | 2,00 | 2,00 | 2,00 | 2,00 | 1,00 | 2,00 | #NULL! | #NULL! |
| 53,00 | 1,00 | 2,00 | 1,00 | 2,00 | 2,00 | 1,00 | 40,00  | #NULL! |
| 53,00 | 2,00 | 1,00 | 2,00 | 1,00 | 2,00 | 2,00 | #NULL! | #NULL! |
| 63,00 | 1,00 | 1,00 | 1,00 | 1,00 | 2,00 | 2,00 | #NULL! | #NULL! |
| 45,00 | 2,00 | 2,00 | 2,00 | 2,00 | 2,00 | 2,00 | #NULL! | #NULL! |
| 46,00 | 1,00 | 2,00 | 2,00 | 2,00 | 2,00 | 2,00 | #NULL! | #NULL! |
| 55,00 | 2,00 | 2,00 | 2,00 | 2,00 | 2,00 | 1,00 | 13,00  | #NULL! |
| 49,00 | 2,00 | 2,00 | 2,00 | 2,00 | 1,00 | 2,00 | #NULL! | #NULL! |
| 48,00 | 1,00 | 2,00 | 2,00 | 2,00 | 2,00 | 2,00 | #NULL! | #NULL! |
| 45,00 | 2,00 | 2,00 | 2,00 | 2,00 | 2,00 | 2,00 | #NULL! | #NULL! |
| 61,00 | 2,00 | 1,00 | 2,00 | 1,00 | 2,00 | 2,00 | #NULL! | #NULL! |
| 50,00 | 1,00 | 2,00 | 1,00 | 2,00 | 1,00 | 1,00 | 30,00  | #NULL! |
| 49,00 | 2,00 | 2,00 | 2,00 | 2,00 | 2,00 | 2,00 | #NULL! | #NULL! |
| 56,00 | 1,00 | 2,00 | 2,00 | 2,00 | 2,00 | 2,00 | #NULL! | #NULL! |
| 49,00 | 2,00 | 2,00 | 2,00 | 1,00 | 2,00 | 1,00 | 30,00  | #NULL! |
| 55,00 | 1,00 | 2,00 | 2,00 | 2,00 | 2,00 | 1,00 | 30,00  | #NULL! |
| 45,00 | 2,00 | 1,00 | 2,00 | 2,00 | 2,00 | 2,00 | #NULL! | #NULL! |
| 54,00 | 2,00 | 1,00 | 2,00 | 2,00 | 1,00 | 2,00 | #NULL! | #NULL! |
| 51,00 | 1,00 | 2,00 | 2,00 | 2,00 | 2,00 | 2,00 | #NULL! | #NULL! |
| 90,00 | 1,00 | 1,00 | 1,00 | 1,00 | 2,00 | 2,00 | #NULL! | #NULL! |
| 45,00 | 1,00 | 2,00 | 2,00 | 2,00 | 2,00 | 2,00 | #NULL! | #NULL! |
| 45,00 | 2,00 | 2,00 | 2,00 | 2,00 | 2,00 | 2,00 | #NULL! | #NULL! |
| 45,00 | 2,00 | 2,00 | 2,00 | 2,00 | 2,00 | 2,00 | #NULL! | #NULL! |
| 54,00 | 1,00 | 2,00 | 2,00 | 2,00 | 2,00 | 2,00 | #NULL! | #NULL! |
| 49,00 | 2,00 | 2,00 | 2,00 | 2,00 | 2,00 | 2,00 | #NULL! | #NULL! |
| 54,00 | 1,00 | 2,00 | 2,00 | 2,00 | 2,00 | 2,00 | #NULL! | #NULL! |
| 56,00 | 2,00 | 2,00 | 2,00 | 2,00 | 2,00 | 2,00 | #NULL! | #NULL! |
| 60,00 | 1,00 | 2,00 | 2,00 | 2,00 | 2,00 | 2,00 | #NULL! | #NULL! |
| 48,00 | 1,00 | 2,00 | 2,00 | 2,00 | 2,00 | 2,00 | #NULL! | #NULL! |
| 60,00 | 2,00 | 2,00 | 2,00 | 2,00 | 2,00 | 2,00 | #NULL! | #NULL! |
| 53,00 | 1,00 | 2,00 | 2,00 | 2,00 | 2,00 | 2,00 | #NULL! | #NULL! |
| 56,00 | 2,00 | 1,00 | 2,00 | 2,00 | 2,00 | 2,00 | #NULL! | #NULL! |
| 55,00 | 2,00 | 1,00 | 2,00 | 2,00 | 2,00 | 2,00 | #NULL! | #NULL! |
| 62,00 | 1,00 | 1,00 | 1,00 | 1,00 | 1,00 | 2,00 | 40,00  | 2,00   |
| 59,00 | 2,00 | 1,00 | 2,00 | 2,00 | 2,00 | 2,00 | #NULL! | #NULL! |
| 62,00 | 1,00 | 1,00 | 2,00 | 2,00 | 2,00 | 2,00 | 40,00  | 10,00  |
| 47,00 | 2,00 | 2,00 | 2,00 | 2,00 | 2,00 | 2,00 | #NULL! | #NULL! |
| 50,00 | 1,00 | 2,00 | 2,00 | 2,00 | 2,00 | 2,00 | #NULL! | #NULL! |
| 60,00 | 2,00 | 1,00 | 1,00 | 2,00 | 1,00 | 2,00 | #NULL! | #NULL! |
| 65,00 | 2,00 | 1,00 | 1,00 | 2,00 | 1,00 | 2,00 | #NULL! | #NULL! |
| 84,00 | 1,00 | 1,00 | 1,00 | 2,00 | 2,00 | 2,00 | #NULL! | #NULL! |
| 75,00 | 1,00 | 2,00 | 1,00 | 1,00 | 2,00 | 2,00 | 30,00  | 20,00  |
| 65,00 | 1,00 | 1,00 | 2,00 | 1,00 | 2,00 | 2,00 | #NULL! | #NULL! |

|       |      |      |      |      |      |      |        |        |
|-------|------|------|------|------|------|------|--------|--------|
| 72,00 | 2,00 | 1,00 | 2,00 | 2,00 | 2,00 | 2,00 | #NULL! | #NULL! |
| 82,00 | 2,00 | 1,00 | 1,00 | 1,00 | 2,00 | 2,00 | #NULL! | #NULL! |
| 60,00 | 1,00 | 2,00 | 2,00 | 2,00 | 2,00 | 2,00 | #NULL! | #NULL! |
| 46,00 | 2,00 | 2,00 | 2,00 | 2,00 | 2,00 | 2,00 | #NULL! | #NULL! |
| 45,00 | 2,00 | 2,00 | 2,00 | 2,00 | 2,00 | 2,00 | #NULL! | #NULL! |
| 54,00 | 1,00 | 2,00 | 2,00 | 2,00 | 2,00 | 1,00 | 28,00  | #NULL! |
| 58,00 | 2,00 | 1,00 | 2,00 | 2,00 | 2,00 | 2,00 | #NULL! | #NULL! |
| 46,00 | 1,00 | 1,00 | 2,00 | 2,00 | 2,00 | 2,00 | #NULL! | #NULL! |
| 45,00 | 1,00 | 2,00 | 2,00 | 2,00 | 2,00 | 2,00 | #NULL! | #NULL! |
| 78,00 | 2,00 | 1,00 | 2,00 | 2,00 | 2,00 | 2,00 | #NULL! | #NULL! |
| 82,00 | 2,00 | 1,00 | 1,00 | 2,00 | 1,00 | 2,00 | #NULL! | #NULL! |
| 64,00 | 1,00 | 2,00 | 2,00 | 2,00 | 2,00 | 1,00 | 20,00  | #NULL! |
| 82,00 | 2,00 | 1,00 | 1,00 | 2,00 | 2,00 | 2,00 | #NULL! | #NULL! |
| 46,00 | 1,00 | 2,00 | 2,00 | 2,00 | 2,00 | 2,00 | #NULL! | #NULL! |
| 48,00 | 2,00 | 2,00 | 2,00 | 2,00 | 2,00 | 2,00 | #NULL! | #NULL! |
| 47,00 | 1,00 | 1,00 | 2,00 | 1,00 | 2,00 | 1,00 | 10,00  | #NULL! |
| 47,00 | 2,00 | 2,00 | 2,00 | 2,00 | 2,00 | 2,00 | #NULL! | #NULL! |
| 47,00 | 1,00 | 2,00 | 1,00 | 2,00 | 2,00 | 2,00 | #NULL! | #NULL! |
| 45,00 | 2,00 | 1,00 | 1,00 | 2,00 | 1,00 | 2,00 | #NULL! | #NULL! |
| 50,00 | 1,00 | 2,00 | 1,00 | 2,00 | 2,00 | 2,00 | #NULL! | #NULL! |
| 48,00 | 2,00 | 2,00 | 1,00 | 2,00 | 2,00 | 2,00 | #NULL! | #NULL! |
| 49,00 | 2,00 | 1,00 | 2,00 | 1,00 | 1,00 | 1,00 | 30,00  | #NULL! |
| 56,00 | 1,00 | 1,00 | 2,00 | 1,00 | 2,00 | 1,00 | 20,00  | #NULL! |
| 45,00 | 2,00 | 1,00 | 2,00 | 1,00 | 2,00 | 2,00 | #NULL! | #NULL! |
| 78,00 | 2,00 | 1,00 | 1,00 | 2,00 | 2,00 | 2,00 | #NULL! | #NULL! |
| 56,00 | 2,00 | 1,00 | 2,00 | 1,00 | 1,00 | 2,00 | #NULL! | #NULL! |
| 59,00 | 1,00 | 1,00 | 2,00 | 2,00 | 2,00 | 2,00 | #NULL! | #NULL! |
| 45,00 | 1,00 | 2,00 | 2,00 | 2,00 | 1,00 | 1,00 | 50,00  | #NULL! |
| 60,00 | 2,00 | 2,00 | 2,00 | 2,00 | 2,00 | 2,00 | #NULL! | #NULL! |
| 48,00 | 1,00 | 2,00 | 2,00 | 2,00 | 2,00 | 2,00 | #NULL! | #NULL! |
| 52,00 | 1,00 | 1,00 | 2,00 | 2,00 | 2,00 | 2,00 | #NULL! | #NULL! |
| 43,00 | 2,00 | 2,00 | 2,00 | 2,00 | 2,00 | 2,00 | #NULL! | #NULL! |
| 43,00 | 2,00 | 2,00 | 2,00 | 2,00 | 2,00 | 2,00 | #NULL! | #NULL! |
| 47,00 | 1,00 | 2,00 | 2,00 | 2,00 | 2,00 | 2,00 | #NULL! | #NULL! |
| 48,00 | 1,00 | 2,00 | 2,00 | 2,00 | 2,00 | 2,00 | #NULL! | #NULL! |
| 45,00 | 2,00 | 2,00 | 2,00 | 2,00 | 2,00 | 2,00 | #NULL! | #NULL! |
| 70,00 | 1,00 | 2,00 | 2,00 | 2,00 | 2,00 | 2,00 | #NULL! | #NULL! |
| 48,00 | 2,00 | 2,00 | 2,00 | 2,00 | 2,00 | 2,00 | #NULL! | #NULL! |
| 56,00 | 1,00 | 1,00 | 2,00 | 2,00 | 2,00 | 2,00 | #NULL! | #NULL! |
| 45,00 | 2,00 | 2,00 | 2,00 | 2,00 | 2,00 | 2,00 | #NULL! | #NULL! |
| 49,00 | 1,00 | 2,00 | 2,00 | 2,00 | 2,00 | 2,00 | #NULL! | #NULL! |
| 56,00 | 1,00 | 1,00 | 2,00 | 2,00 | 2,00 | 1,00 | 40,00  | #NULL! |
| 66,00 | 1,00 | 1,00 | 2,00 | 1,00 | 2,00 | 1,00 | 40,00  | #NULL! |
| 58,00 | 1,00 | 2,00 | 2,00 | 2,00 | 2,00 | 2,00 | #NULL! | #NULL! |
| 50,00 | 2,00 | 2,00 | 2,00 | 2,00 | 2,00 | 2,00 | #NULL! | #NULL! |
| 49,00 | 1,00 | 2,00 | 2,00 | 2,00 | 2,00 | 2,00 | #NULL! | #NULL! |
| 52,00 | 1,00 | 2,00 | 2,00 | 2,00 | 2,00 | 2,00 | #NULL! | #NULL! |
| 44,00 | 1,00 | 1,00 | 2,00 | 2,00 | 2,00 | 1,00 | 20,00  | #NULL! |
| 46,00 | 2,00 | 2,00 | 2,00 | 2,00 | 2,00 | 2,00 | #NULL! | #NULL! |
| 48,00 | 1,00 | 2,00 | 2,00 | 2,00 | 2,00 | 2,00 | #NULL! | #NULL! |







|       |      |      |      |      |      |      |        |        |
|-------|------|------|------|------|------|------|--------|--------|
| 56,00 | 1,00 | 2,00 | 1,00 | 2,00 | 2,00 | 2,00 | #NULL! | #NULL! |
| 48,00 | 1,00 | 2,00 | 2,00 | 2,00 | 2,00 | 2,00 | #NULL! | #NULL! |
| 89,00 | 1,00 | 1,00 | 2,00 | 1,00 | 2,00 | 2,00 | #NULL! | #NULL! |
| 64,00 | 2,00 | 2,00 | 1,00 | 2,00 | 1,00 | 2,00 | #NULL! | #NULL! |
| 72,00 | 2,00 | 1,00 | 1,00 | 2,00 | 2,00 | 2,00 | #NULL! | #NULL! |
| 63,00 | 1,00 | 1,00 | 2,00 | 2,00 | 2,00 | 2,00 | #NULL! | #NULL! |
| 45,00 | 1,00 | 2,00 | 2,00 | 2,00 | 2,00 | 2,00 | #NULL! | #NULL! |
| 74,00 | 2,00 | 1,00 | 2,00 | 1,00 | 2,00 | 2,00 | #NULL! | #NULL! |
| 55,00 | 2,00 | 1,00 | 2,00 | 2,00 | 2,00 | 2,00 | #NULL! | #NULL! |
| 64,00 | 2,00 | 1,00 | 2,00 | 2,00 | 2,00 | 2,00 | #NULL! | #NULL! |
| 60,00 | 1,00 | 2,00 | 1,00 | 1,00 | 2,00 | 1,00 | 15,00  | #NULL! |
| 71,00 | 2,00 | 1,00 | 2,00 | 2,00 | 2,00 | 2,00 | #NULL! | #NULL! |
| 68,00 | 2,00 | 1,00 | 1,00 | 1,00 | 2,00 | 2,00 | #NULL! | #NULL! |
| 54,00 | 2,00 | 1,00 | 2,00 | 2,00 | 2,00 | 2,00 | #NULL! | #NULL! |
| 47,00 | 1,00 | 2,00 | 2,00 | 2,00 | 2,00 | 1,00 | 7,00   | #NULL! |
| 45,00 | 1,00 | 2,00 | 2,00 | 2,00 | 2,00 | 2,00 | #NULL! | #NULL! |
| 53,00 | 1,00 | 1,00 | 2,00 | 2,00 | 2,00 | 2,00 | #NULL! | #NULL! |
| 92,00 | 1,00 | 1,00 | 1,00 | 1,00 | 2,00 | 2,00 | #NULL! | #NULL! |
| 46,00 | 2,00 | 2,00 | 1,00 | 2,00 | 2,00 | 2,00 | #NULL! | #NULL! |
| 55,00 | 1,00 | 2,00 | 2,00 | 2,00 | 2,00 | 2,00 | #NULL! | #NULL! |
| 71,00 | 2,00 | 1,00 | 2,00 | 2,00 | 2,00 | 2,00 | #NULL! | #NULL! |
| 49,00 | 2,00 | 2,00 | 2,00 | 2,00 | 2,00 | 2,00 | #NULL! | #NULL! |
| 79,00 | 1,00 | 1,00 | 2,00 | 1,00 | 2,00 | 2,00 | #NULL! | #NULL! |
| 50,00 | 1,00 | 2,00 | 2,00 | 2,00 | 2,00 | 2,00 | #NULL! | #NULL! |
| 55,00 | 1,00 | 1,00 | 2,00 | 2,00 | 2,00 | 2,00 | #NULL! | #NULL! |
| 64,00 | 1,00 | 1,00 | 2,00 | 1,00 | 2,00 | 2,00 | #NULL! | #NULL! |
| 45,00 | 2,00 | 2,00 | 2,00 | 2,00 | 2,00 | 2,00 | #NULL! | #NULL! |
| 51,00 | 1,00 | 2,00 | 2,00 | 2,00 | 2,00 | 2,00 | #NULL! | #NULL! |
| 52,00 | 2,00 | 2,00 | 2,00 | 2,00 | 2,00 | 2,00 | #NULL! | #NULL! |
| 63,00 | 1,00 | 1,00 | 1,00 | 1,00 | 2,00 | 1,00 | 33,00  | #NULL! |
| 52,00 | 2,00 | 2,00 | 2,00 | 2,00 | 2,00 | 2,00 | #NULL! | #NULL! |
| 62,00 | 2,00 | 2,00 | 1,00 | 1,00 | 1,00 | 2,00 | #NULL! | #NULL! |
| 59,00 | 1,00 | 1,00 | 2,00 | 1,00 | 2,00 | 2,00 | #NULL! | #NULL! |
| 69,00 | 2,00 | 1,00 | 1,00 | 2,00 | 1,00 | 2,00 | #NULL! | #NULL! |
| 64,00 | 1,00 | 1,00 | 2,00 | 2,00 | 1,00 | 2,00 | #NULL! | #NULL! |
| 59,00 | 2,00 | 1,00 | 2,00 | 2,00 | 2,00 | 2,00 | #NULL! | #NULL! |
| 60,00 | 2,00 | 1,00 | 2,00 | 2,00 | 1,00 | 2,00 | #NULL! | #NULL! |
| 45,00 | 2,00 | 2,00 | 2,00 | 2,00 | 2,00 | 2,00 | #NULL! | #NULL! |
| 58,00 | 1,00 | 2,00 | 2,00 | 1,00 | 2,00 | 2,00 | #NULL! | #NULL! |
| 47,00 | 2,00 | 2,00 | 2,00 | 2,00 | 2,00 | 2,00 | #NULL! | #NULL! |
| 55,00 | 1,00 | 1,00 | 2,00 | 2,00 | 2,00 | 2,00 | #NULL! | #NULL! |
| 58,00 | 2,00 | 2,00 | 1,00 | 2,00 | 2,00 | 2,00 | #NULL! | #NULL! |
| 66,00 | 2,00 | 1,00 | 1,00 | 2,00 | 1,00 | 2,00 | #NULL! | #NULL! |
| 62,00 | 1,00 | 2,00 | 2,00 | 2,00 | 2,00 | 2,00 | #NULL! | #NULL! |
| 59,00 | 2,00 | 1,00 | 2,00 | 2,00 | 2,00 | 2,00 | #NULL! | #NULL! |
| 45,00 | 1,00 | 2,00 | 2,00 | 2,00 | 2,00 | 2,00 | #NULL! | #NULL! |
| 60,00 | 2,00 | 1,00 | 2,00 | 2,00 | 2,00 | 2,00 | #NULL! | #NULL! |
| 64,00 | 2,00 | 1,00 | 2,00 | 1,00 | 2,00 | 2,00 | #NULL! | #NULL! |
| 52,00 | 2,00 | 1,00 | 2,00 | 1,00 | 1,00 | 2,00 | #NULL! | #NULL! |
| 55,00 | 2,00 | 2,00 | 1,00 | 2,00 | 2,00 | 2,00 | #NULL! | #NULL! |









|       |      |      |      |      |      |      |        |        |
|-------|------|------|------|------|------|------|--------|--------|
| 55,00 | 2,00 | 1,00 | 2,00 | 2,00 | 2,00 | 2,00 | #NULL! | #NULL! |
| 45,00 | 2,00 | 2,00 | 2,00 | 2,00 | 2,00 | 2,00 | #NULL! | #NULL! |
| 55,00 | 1,00 | 1,00 | 2,00 | 2,00 | 2,00 | 2,00 | #NULL! | #NULL! |
| 58,00 | 1,00 | 1,00 | 1,00 | 2,00 | 1,00 | 1,00 | 36,00  | #NULL! |
| 50,00 | 2,00 | 2,00 | 2,00 | 2,00 | 1,00 | 2,00 | #NULL! | #NULL! |
| 46,00 | 2,00 | 2,00 | 2,00 | 2,00 | 2,00 | 2,00 | #NULL! | #NULL! |
| 56,00 | 1,00 | 2,00 | 2,00 | 2,00 | 2,00 | 2,00 | #NULL! | #NULL! |
| 60,00 | 1,00 | 2,00 | 2,00 | 2,00 | 2,00 | 1,00 | 30,00  | #NULL! |
| 55,00 | 2,00 | 1,00 | 2,00 | 2,00 | 2,00 | 2,00 | #NULL! | #NULL! |
| 49,00 | 2,00 | 2,00 | 2,00 | 1,00 | 2,00 | 1,00 | 45,00  | #NULL! |
| 61,00 | 2,00 | 1,00 | 2,00 | 2,00 | 2,00 | 2,00 | #NULL! | #NULL! |
| 45,00 | 1,00 | 1,00 | 2,00 | 1,00 | 2,00 | 2,00 | #NULL! | #NULL! |
| 46,00 | 1,00 | 2,00 | 2,00 | 2,00 | 2,00 | 2,00 | #NULL! | #NULL! |
| 46,00 | 2,00 | 2,00 | 2,00 | 2,00 | 2,00 | 2,00 | #NULL! | #NULL! |
| 48,00 | 1,00 | 2,00 | 2,00 | 2,00 | 2,00 | 2,00 | #NULL! | #NULL! |
| 59,00 | 1,00 | 2,00 | 2,00 | 2,00 | 2,00 | 2,00 | #NULL! | #NULL! |
| 51,00 | 2,00 | 2,00 | 2,00 | 2,00 | 2,00 | 2,00 | #NULL! | #NULL! |
| 47,00 | 2,00 | 2,00 | 2,00 | 2,00 | 2,00 | 2,00 | #NULL! | #NULL! |
| 55,00 | 1,00 | 1,00 | 2,00 | 2,00 | 1,00 | 2,00 | #NULL! | #NULL! |
| 72,00 | 2,00 | 1,00 | 1,00 | 1,00 | 1,00 | 2,00 | #NULL! | #NULL! |
| 82,00 | 1,00 | 1,00 | 1,00 | 1,00 | 1,00 | 1,00 | 30,00  | #NULL! |
| 49,00 | 1,00 | 1,00 | 1,00 | 2,00 | 1,00 | 1,00 | 20,00  | #NULL! |
| 58,00 | 1,00 | 2,00 | 1,00 | 2,00 | 2,00 | 1,00 | 28,00  | #NULL! |
| 61,00 | 1,00 | 1,00 | 2,00 | 2,00 | 1,00 | 2,00 | #NULL! | #NULL! |
| 69,00 | 1,00 | 1,00 | 2,00 | 2,00 | 1,00 | 1,00 | 15,00  | #NULL! |
| 75,00 | 1,00 | 1,00 | 2,00 | 2,00 | 1,00 | 2,00 | 30,00  | 30,00  |
| 76,00 | 2,00 | 1,00 | 1,00 | 2,00 | 2,00 | 1,00 | 15,00  | #NULL! |
| 56,00 | 2,00 | 1,00 | 2,00 | 2,00 | 2,00 | 2,00 | #NULL! | #NULL! |
| 59,00 | 1,00 | 1,00 | 2,00 | 2,00 | 2,00 | 2,00 | #NULL! | #NULL! |
| 58,00 | 1,00 | 1,00 | 2,00 | 2,00 | 2,00 | 2,00 | #NULL! | #NULL! |
| 61,00 | 2,00 | 1,00 | 1,00 | 2,00 | 2,00 | 2,00 | #NULL! | #NULL! |
| 55,00 | 1,00 | 1,00 | 2,00 | 2,00 | 2,00 | 2,00 | #NULL! | #NULL! |
| 48,00 | 1,00 | 1,00 | 1,00 | 2,00 | 2,00 | 2,00 | #NULL! | #NULL! |
| 77,00 | 1,00 | 1,00 | 1,00 | 2,00 | 1,00 | 2,00 | #NULL! | #NULL! |
| 57,00 | 1,00 | 1,00 | 2,00 | 2,00 | 2,00 | 2,00 | #NULL! | #NULL! |
| 54,00 | 2,00 | 2,00 | 1,00 | 2,00 | 2,00 | 2,00 | #NULL! | #NULL! |
| 56,00 | 2,00 | 2,00 | 2,00 | 2,00 | 2,00 | 2,00 | #NULL! | #NULL! |
| 52,00 | 2,00 | 1,00 | 1,00 | 2,00 | 2,00 | 2,00 | #NULL! | #NULL! |
| 54,00 | 1,00 | 1,00 | 1,00 | 2,00 | 2,00 | 2,00 | #NULL! | #NULL! |
| 55,00 | 1,00 | 2,00 | 2,00 | 2,00 | 2,00 | 2,00 | #NULL! | #NULL! |
| 57,00 | 1,00 | 1,00 | 1,00 | 2,00 | 2,00 | 1,00 | 20,00  | #NULL! |
| 50,00 | 1,00 | 1,00 | 1,00 | 2,00 | 2,00 | 1,00 | 12,00  | #NULL! |
| 52,00 | 2,00 | 1,00 | 1,00 | 2,00 | 2,00 | 2,00 | #NULL! | #NULL! |
| 54,00 | 2,00 | 2,00 | 2,00 | 2,00 | 2,00 | 2,00 | #NULL! | #NULL! |
| 54,00 | 1,00 | 2,00 | 2,00 | 2,00 | 2,00 | 2,00 | #NULL! | #NULL! |
| 46,00 | 1,00 | 2,00 | 2,00 | 2,00 | 2,00 | 2,00 | #NULL! | #NULL! |
| 48,00 | 1,00 | 2,00 | 2,00 | 2,00 | 2,00 | 2,00 | #NULL! | #NULL! |
| 49,00 | 1,00 | 2,00 | 2,00 | 2,00 | 2,00 | 2,00 | #NULL! | #NULL! |
| 56,00 | 1,00 | 1,00 | 2,00 | 2,00 | 2,00 | 2,00 | #NULL! | #NULL! |
| 65,00 | 1,00 | 2,00 | 2,00 | 2,00 | 2,00 | 2,00 | #NULL! | #NULL! |

|       |      |      |      |      |      |      |        |        |
|-------|------|------|------|------|------|------|--------|--------|
| 69,00 | 2,00 | 2,00 | 2,00 | 2,00 | 2,00 | 2,00 | #NULL! | #NULL! |
| 49,00 | 1,00 | 2,00 | 2,00 | 2,00 | 2,00 | 2,00 | #NULL! | #NULL! |
| 52,00 | 2,00 | 2,00 | 2,00 | 2,00 | 2,00 | 2,00 | #NULL! | #NULL! |
| 52,00 | 1,00 | 1,00 | 1,00 | 2,00 | 2,00 | 1,00 | 10,00  | #NULL! |
| 52,00 | 2,00 | 1,00 | 2,00 | 2,00 | 2,00 | 2,00 | #NULL! | #NULL! |
| 54,00 | 2,00 | 2,00 | 2,00 | 2,00 | 2,00 | 2,00 | #NULL! | #NULL! |
| 55,00 | 1,00 | 2,00 | 2,00 | 2,00 | 2,00 | 2,00 | #NULL! | #NULL! |
| 53,00 | 2,00 | 2,00 | 2,00 | 2,00 | 2,00 | 2,00 | #NULL! | #NULL! |
| 55,00 | 1,00 | 2,00 | 2,00 | 2,00 | 2,00 | 2,00 | #NULL! | #NULL! |
| 55,00 | 1,00 | 1,00 | 1,00 | 2,00 | 2,00 | 1,00 | 20,00  | #NULL! |
| 56,00 | 2,00 | 2,00 | 2,00 | 2,00 | 2,00 | 2,00 | #NULL! | #NULL! |
| 53,00 | 1,00 | 1,00 | 1,00 | 2,00 | 2,00 | 2,00 | #NULL! | #NULL! |
| 52,00 | 2,00 | 1,00 | 1,00 | 2,00 | 2,00 | 2,00 | #NULL! | #NULL! |
| 55,00 | 2,00 | 2,00 | 2,00 | 2,00 | 2,00 | 2,00 | #NULL! | #NULL! |
| 53,00 | 1,00 | 2,00 | 2,00 | 2,00 | 2,00 | 2,00 | #NULL! | #NULL! |
| 53,00 | 1,00 | 1,00 | 1,00 | 2,00 | 2,00 | 2,00 | #NULL! | #NULL! |
| 54,00 | 2,00 | 1,00 | 1,00 | 2,00 | 2,00 | 2,00 | #NULL! | #NULL! |
| 54,00 | 2,00 | 1,00 | 1,00 | 2,00 | 2,00 | 1,00 | 28,00  | #NULL! |
| 57,00 | 1,00 | 1,00 | 1,00 | 2,00 | 2,00 | 1,00 | 30,00  | #NULL! |
| 56,00 | 1,00 | 1,00 | 1,00 | 2,00 | 2,00 | 1,00 | 30,00  | #NULL! |
| 54,00 | 2,00 | 1,00 | 1,00 | 2,00 | 2,00 | 2,00 | #NULL! | #NULL! |
| 58,00 | 1,00 | 2,00 | 2,00 | 2,00 | 2,00 | 2,00 | #NULL! | #NULL! |
| 57,00 | 2,00 | 2,00 | 2,00 | 2,00 | 2,00 | 2,00 | #NULL! | #NULL! |
| 52,00 | 1,00 | 2,00 | 2,00 | 2,00 | 2,00 | 2,00 | #NULL! | #NULL! |
| 52,00 | 2,00 | 2,00 | 2,00 | 2,00 | 2,00 | 2,00 | #NULL! | #NULL! |
| 57,00 | 1,00 | 1,00 | 1,00 | 2,00 | 2,00 | 2,00 | #NULL! | #NULL! |
| 57,00 | 2,00 | 1,00 | 1,00 | 2,00 | 2,00 | 2,00 | #NULL! | #NULL! |
| 52,00 | 1,00 | 1,00 | 1,00 | 2,00 | 2,00 | 2,00 | #NULL! | #NULL! |
| 50,00 | 2,00 | 1,00 | 1,00 | 2,00 | 2,00 | 2,00 | #NULL! | #NULL! |
| 55,00 | 1,00 | 1,00 | 1,00 | 2,00 | 2,00 | 1,00 | 26,00  | #NULL! |
| 53,00 | 2,00 | 1,00 | 1,00 | 2,00 | 2,00 | 2,00 | #NULL! | #NULL! |
| 53,00 | 2,00 | 1,00 | 2,00 | 2,00 | 2,00 | 2,00 | #NULL! | #NULL! |
| 53,00 | 1,00 | 2,00 | 1,00 | 2,00 | 2,00 | 2,00 | #NULL! | #NULL! |
| 55,00 | 1,00 | 2,00 | 2,00 | 2,00 | 2,00 | 2,00 | #NULL! | #NULL! |
| 53,00 | 2,00 | 2,00 | 2,00 | 2,00 | 2,00 | 2,00 | #NULL! | #NULL! |
| 56,00 | 2,00 | 2,00 | 2,00 | 2,00 | 2,00 | 2,00 | #NULL! | #NULL! |
| 55,00 | 2,00 | 2,00 | 2,00 | 2,00 | 2,00 | 2,00 | #NULL! | #NULL! |
| 54,00 | 1,00 | 1,00 | 2,00 | 2,00 | 2,00 | 1,00 | 30,00  | #NULL! |
| 52,00 | 2,00 | 2,00 | 1,00 | 2,00 | 2,00 | 2,00 | #NULL! | #NULL! |
| 56,00 | 2,00 | 1,00 | 1,00 | 2,00 | 2,00 | 2,00 | #NULL! | #NULL! |
| 55,00 | 1,00 | 1,00 | 1,00 | 2,00 | 2,00 | 2,00 | #NULL! | #NULL! |
| 55,00 | 1,00 | 1,00 | 2,00 | 2,00 | 2,00 | 2,00 | #NULL! | #NULL! |
| 55,00 | 2,00 | 2,00 | 1,00 | 2,00 | 2,00 | 2,00 | #NULL! | #NULL! |
| 56,00 | 1,00 | 1,00 | 2,00 | 2,00 | 2,00 | 2,00 | #NULL! | #NULL! |
| 59,00 | 1,00 | 1,00 | 2,00 | 2,00 | 1,00 | 1,00 | 20,00  | #NULL! |
| 58,00 | 1,00 | 2,00 | 1,00 | 2,00 | 1,00 | 2,00 | #NULL! | #NULL! |
| 45,00 | 1,00 | 2,00 | 2,00 | 2,00 | 2,00 | 2,00 | #NULL! | #NULL! |
| 70,00 | 1,00 | 1,00 | 1,00 | 2,00 | 1,00 | 2,00 | 90,00  | 10,00  |
| 66,00 | 1,00 | 1,00 | 2,00 | 2,00 | 2,00 | 2,00 | #NULL! | #NULL! |
| 56,00 | 2,00 | 1,00 | 1,00 | 2,00 | 1,00 | 2,00 | #NULL! | #NULL! |

|       |      |      |      |      |      |      |        |        |
|-------|------|------|------|------|------|------|--------|--------|
| 66,00 | 1,00 | 2,00 | 2,00 | 2,00 | 1,00 | 1,00 | 20,00  | #NULL! |
| 49,00 | 1,00 | 2,00 | 2,00 | 2,00 | 2,00 | 2,00 | #NULL! | #NULL! |
| 45,00 | 1,00 | 2,00 | 2,00 | 2,00 | 2,00 | 2,00 | #NULL! | #NULL! |
| 46,00 | 2,00 | 1,00 | 2,00 | 2,00 | 1,00 | 1,00 | 25,00  | #NULL! |
| 48,00 | 1,00 | 1,00 | 2,00 | 2,00 | 2,00 | 2,00 | 2,00   | #NULL! |
| 45,00 | 2,00 | 2,00 | 2,00 | 2,00 | 2,00 | 2,00 | #NULL! | #NULL! |
| 46,00 | 2,00 | 2,00 | 2,00 | 2,00 | 2,00 | 2,00 | #NULL! | #NULL! |
| 51,00 | 2,00 | 2,00 | 2,00 | 2,00 | 2,00 | 2,00 | #NULL! | #NULL! |
| 56,00 | 2,00 | 2,00 | 2,00 | 2,00 | 2,00 | 2,00 | #NULL! | #NULL! |
| 55,00 | 1,00 | 1,00 | 2,00 | 2,00 | 1,00 | 1,00 | 30,00  | #NULL! |
| 47,00 | 2,00 | 2,00 | 2,00 | 2,00 | 2,00 | 2,00 | #NULL! | #NULL! |
| 46,00 | 1,00 | 2,00 | 2,00 | 2,00 | 2,00 | 2,00 | #NULL! | #NULL! |
| 77,00 | 1,00 | 1,00 | 1,00 | 2,00 | 1,00 | 1,00 | 10,00  | 30,00  |
| 56,00 | 1,00 | 1,00 | 2,00 | 2,00 | 1,00 | 1,00 | 45,00  | #NULL! |
| 47,00 | 1,00 | 2,00 | 2,00 | 2,00 | 2,00 | 2,00 | #NULL! | #NULL! |
| 68,00 | 1,00 | 1,00 | 2,00 | 2,00 | 1,00 | 1,00 | 30,00  | #NULL! |
| 70,00 | 1,00 | 2,00 | 2,00 | 2,00 | 2,00 | 2,00 | #NULL! | #NULL! |
| 50,00 | 2,00 | 2,00 | 2,00 | 2,00 | 2,00 | 2,00 | #NULL! | #NULL! |
| 52,00 | 1,00 | 1,00 | 2,00 | 2,00 | 2,00 | 2,00 | #NULL! | #NULL! |
| 46,00 | 2,00 | 1,00 | 1,00 | 2,00 | 2,00 | 2,00 | #NULL! | #NULL! |
| 49,00 | 1,00 | 2,00 | 2,00 | 2,00 | 2,00 | 2,00 | #NULL! | #NULL! |
| 52,00 | 2,00 | 1,00 | 2,00 | 2,00 | 2,00 | 2,00 | #NULL! | #NULL! |
| 48,00 | 1,00 | 2,00 | 1,00 | 2,00 | 2,00 | 2,00 | #NULL! | #NULL! |
| 46,00 | 2,00 | 2,00 | 2,00 | 2,00 | 2,00 | 2,00 | #NULL! | #NULL! |
| 45,00 | 1,00 | 2,00 | 2,00 | 2,00 | 2,00 | 2,00 | #NULL! | #NULL! |
| 77,00 | 2,00 | 1,00 | 1,00 | 2,00 | 1,00 | 2,00 | #NULL! | #NULL! |
| 70,00 | 1,00 | 1,00 | 2,00 | 2,00 | 2,00 | 2,00 | #NULL! | #NULL! |
| 60,00 | 2,00 | 1,00 | 2,00 | 2,00 | 2,00 | 2,00 | #NULL! | #NULL! |
| 58,00 | 1,00 | 1,00 | 2,00 | 2,00 | 2,00 | 2,00 | #NULL! | #NULL! |
| 46,00 | 2,00 | 2,00 | 2,00 | 2,00 | 2,00 | 2,00 | #NULL! | #NULL! |
| 48,00 | 1,00 | 2,00 | 2,00 | 2,00 | 2,00 | 2,00 | #NULL! | #NULL! |
| 46,00 | 1,00 | 2,00 | 2,00 | 2,00 | 2,00 | 2,00 | #NULL! | #NULL! |
| 56,00 | 1,00 | 1,00 | 2,00 | 2,00 | 2,00 | 2,00 | #NULL! | #NULL! |
| 59,00 | 2,00 | 1,00 | 2,00 | 2,00 | 2,00 | 2,00 | #NULL! | #NULL! |
| 58,00 | 1,00 | 2,00 | 1,00 | 1,00 | 1,00 | 2,00 | #NULL! | #NULL! |
| 56,00 | 2,00 | 1,00 | 2,00 | 2,00 | 2,00 | 1,00 | 80,00  | #NULL! |
| 62,00 | 2,00 | 1,00 | 1,00 | 1,00 | 2,00 | 2,00 | #NULL! | #NULL! |
| 62,00 | 1,00 | 2,00 | 2,00 | 2,00 | 2,00 | 2,00 | #NULL! | #NULL! |
| 65,00 | 2,00 | 2,00 | 2,00 | 2,00 | 2,00 | 2,00 | #NULL! | #NULL! |
| 60,00 | 2,00 | 1,00 | 1,00 | 1,00 | 1,00 | 1,00 | 30,00  | #NULL! |
| 63,00 | 1,00 | 2,00 | 2,00 | 2,00 | 2,00 | 2,00 | #NULL! | #NULL! |
| 74,00 | 2,00 | 1,00 | 2,00 | 1,00 | 2,00 | 2,00 | #NULL! | #NULL! |
| 65,00 | 1,00 | 2,00 | 2,00 | 2,00 | 2,00 | 2,00 | #NULL! | #NULL! |
| 50,00 | 2,00 | 2,00 | 2,00 | 2,00 | 2,00 | 1,00 | 25,00  | #NULL! |
| 55,00 | 1,00 | 1,00 | 2,00 | 2,00 | 2,00 | 2,00 | #NULL! | #NULL! |
| 55,00 | 2,00 | 2,00 | 2,00 | 2,00 | 2,00 | 2,00 | #NULL! | #NULL! |
| 83,00 | 1,00 | 2,00 | 2,00 | 2,00 | 2,00 | 2,00 | #NULL! | #NULL! |
| 83,00 | 2,00 | 1,00 | 1,00 | 2,00 | 2,00 | 2,00 | #NULL! | #NULL! |
| 84,00 | 1,00 | 2,00 | 2,00 | 2,00 | 2,00 | 1,00 | 90,00  | #NULL! |
| 50,00 | 1,00 | 2,00 | 2,00 | 2,00 | 2,00 | 1,00 | 30,00  | #NULL! |

|       |      |      |      |      |      |      |        |        |
|-------|------|------|------|------|------|------|--------|--------|
| 45,00 | 2,00 | 2,00 | 2,00 | 2,00 | 2,00 | 2,00 | #NULL! | #NULL! |
| 76,00 | 1,00 | 2,00 | 1,00 | 1,00 | 2,00 | 2,00 | #NULL! | #NULL! |
| 77,00 | 2,00 | 1,00 | 2,00 | 2,00 | 2,00 | 2,00 | #NULL! | #NULL! |
| 50,00 | 2,00 | 2,00 | 2,00 | 2,00 | 2,00 | 2,00 | #NULL! | #NULL! |
| 45,00 | 1,00 | 2,00 | 2,00 | 2,00 | 2,00 | 2,00 | #NULL! | #NULL! |
| 85,00 | 2,00 | 1,00 | 2,00 | 1,00 | 2,00 | 2,00 | #NULL! | #NULL! |
| 60,00 | 1,00 | 2,00 | 2,00 | 2,00 | 2,00 | 2,00 | #NULL! | #NULL! |
| 58,00 | 1,00 | 1,00 | 1,00 | 2,00 | 2,00 | 2,00 | #NULL! | #NULL! |
| 60,00 | 1,00 | 1,00 | 2,00 | 2,00 | 2,00 | 1,00 | 60,00  | #NULL! |
| 55,00 | 1,00 | 2,00 | 2,00 | 2,00 | 2,00 | 1,00 | 15,00  | #NULL! |
| 62,00 | 2,00 | 1,00 | 1,00 | 2,00 | 2,00 | 1,00 | 120,00 | #NULL! |
| 50,00 | 1,00 | 2,00 | 1,00 | 1,00 | 2,00 | 2,00 | #NULL! | #NULL! |
| 55,00 | 2,00 | 1,00 | 2,00 | 1,00 | 2,00 | 2,00 | #NULL! | #NULL! |
| 73,00 | 2,00 | 2,00 | 2,00 | 2,00 | 2,00 | 2,00 | #NULL! | #NULL! |
| 53,00 | 2,00 | 2,00 | 2,00 | 2,00 | 2,00 | 2,00 | #NULL! | #NULL! |
| 45,00 | 1,00 | 2,00 | 2,00 | 2,00 | 2,00 | 1,00 | 60,00  | #NULL! |
| 45,00 | 2,00 | 2,00 | 2,00 | 2,00 | 2,00 | 1,00 | 20,00  | #NULL! |
| 56,00 | 2,00 | 2,00 | 1,00 | 2,00 | 2,00 | 2,00 | #NULL! | #NULL! |
| 58,00 | 1,00 | 2,00 | 2,00 | 2,00 | 2,00 | 2,00 | #NULL! | #NULL! |
| 62,00 | 1,00 | 2,00 | 1,00 | 2,00 | 1,00 | 1,00 | 60,00  | #NULL! |
| 59,00 | 2,00 | 2,00 | 2,00 | 2,00 | 2,00 | 2,00 | #NULL! | #NULL! |
| 46,00 | 1,00 | 1,00 | 2,00 | 2,00 | 2,00 | 1,00 | 30,00  | #NULL! |
| 52,00 | 2,00 | 1,00 | 2,00 | 2,00 | 2,00 | 2,00 | #NULL! | #NULL! |
| 74,00 | 2,00 | 2,00 | 2,00 | 2,00 | 2,00 | 2,00 | #NULL! | #NULL! |
| 72,00 | 2,00 | 1,00 | 2,00 | 2,00 | 2,00 | 2,00 | #NULL! | #NULL! |
| 61,00 | 2,00 | 1,00 | 1,00 | 1,00 | 1,00 | 2,00 | #NULL! | #NULL! |
| 59,00 | 1,00 | 1,00 | 2,00 | 2,00 | 2,00 | 1,00 | 8,00   | #NULL! |
| 66,00 | 1,00 | 2,00 | 2,00 | 1,00 | 1,00 | 2,00 | #NULL! | #NULL! |
| 69,00 | 1,00 | 2,00 | 2,00 | 2,00 | 2,00 | 2,00 | #NULL! | #NULL! |
| 72,00 | 1,00 | 1,00 | 1,00 | 2,00 | 2,00 | 2,00 | #NULL! | #NULL! |
| 60,00 | 2,00 | 1,00 | 1,00 | 2,00 | 2,00 | 2,00 | #NULL! | #NULL! |
| 56,00 | 1,00 | 2,00 | 1,00 | 2,00 | 2,00 | 2,00 | #NULL! | #NULL! |
| 62,00 | 1,00 | 2,00 | 2,00 | 2,00 | 2,00 | 1,00 | 200,00 | #NULL! |
| 45,00 | 1,00 | 2,00 | 1,00 | 2,00 | 2,00 | 1,00 | 60,00  | #NULL! |
| 50,00 | 2,00 | 1,00 | 1,00 | 2,00 | 1,00 | 2,00 | #NULL! | #NULL! |
| 75,00 | 1,00 | 2,00 | 2,00 | 2,00 | 2,00 | 2,00 | #NULL! | #NULL! |
| 65,00 | 1,00 | 2,00 | 2,00 | 2,00 | 1,00 | 1,00 | 25,00  | #NULL! |
| 48,00 | 2,00 | 1,00 | 2,00 | 2,00 | 2,00 | 2,00 | #NULL! | #NULL! |
| 53,00 | 1,00 | 1,00 | 1,00 | 2,00 | 1,00 | 1,00 | 40,00  | #NULL! |
| 67,00 | 1,00 | 2,00 | 2,00 | 1,00 | 1,00 | 2,00 | #NULL! | #NULL! |
| 50,00 | 2,00 | 1,00 | 1,00 | 2,00 | 2,00 | 1,00 | 40,00  | #NULL! |
| 45,00 | 2,00 | 1,00 | 1,00 | 2,00 | 1,00 | 1,00 | 30,00  | #NULL! |
| 50,00 | 2,00 | 1,00 | 1,00 | 1,00 | 2,00 | 1,00 | 30,00  | #NULL! |
| 48,00 | 1,00 | 2,00 | 2,00 | 2,00 | 2,00 | 2,00 | #NULL! | #NULL! |
| 56,00 | 2,00 | 2,00 | 2,00 | 2,00 | 2,00 | 2,00 | #NULL! | #NULL! |
| 58,00 | 1,00 | 1,00 | 1,00 | 2,00 | 2,00 | 1,00 | 30,00  | #NULL! |
| 48,00 | 2,00 | 2,00 | 2,00 | 2,00 | 2,00 | 2,00 | #NULL! | #NULL! |
| 59,00 | 1,00 | 1,00 | 2,00 | 2,00 | 2,00 | 1,00 | 15,00  | #NULL! |
| 64,00 | 2,00 | 2,00 | 2,00 | 2,00 | 2,00 | 2,00 | #NULL! | #NULL! |
| 45,00 | 1,00 | 2,00 | 2,00 | 2,00 | 2,00 | 1,00 | 28,00  | #NULL! |



|       |      |      |      |      |      |      |        |        |
|-------|------|------|------|------|------|------|--------|--------|
| 60,00 | 1,00 | 2,00 | 2,00 | 2,00 | 2,00 | 2,00 | #NULL! | #NULL! |
| 60,00 | 2,00 | 2,00 | 2,00 | 2,00 | 2,00 | 2,00 | #NULL! | #NULL! |
| 65,00 | 1,00 | 2,00 | 2,00 | 2,00 | 2,00 | 2,00 | #NULL! | #NULL! |
| 45,00 | 2,00 | 2,00 | 2,00 | 2,00 | 2,00 | 2,00 | #NULL! | #NULL! |
| 51,00 | 1,00 | 2,00 | 2,00 | 2,00 | 2,00 | 2,00 | #NULL! | #NULL! |
| 46,00 | 2,00 | 2,00 | 2,00 | 2,00 | 2,00 | 2,00 | #NULL! | #NULL! |
| 50,00 | 1,00 | 1,00 | 2,00 | 2,00 | 2,00 | 2,00 | #NULL! | #NULL! |
| 45,00 | 2,00 | 2,00 | 2,00 | 2,00 | 2,00 | 2,00 | #NULL! | #NULL! |
| 47,00 | 1,00 | 2,00 | 2,00 | 2,00 | 2,00 | 2,00 | #NULL! | #NULL! |
| 82,00 | 1,00 | 1,00 | 1,00 | 2,00 | 2,00 | 2,00 | #NULL! | #NULL! |
| 59,00 | 2,00 | 2,00 | 1,00 | 2,00 | 2,00 | 2,00 | #NULL! | #NULL! |
| 53,00 | 1,00 | 2,00 | 2,00 | 2,00 | 2,00 | 2,00 | #NULL! | #NULL! |
| 48,00 | 1,00 | 2,00 | 2,00 | 2,00 | 2,00 | 2,00 | #NULL! | #NULL! |
| 59,00 | 1,00 | 1,00 | 2,00 | 2,00 | 2,00 | 1,00 | 30,00  | #NULL! |
| 45,00 | 2,00 | 2,00 | 2,00 | 2,00 | 2,00 | 1,00 | 25,00  | #NULL! |
| 45,00 | 2,00 | 2,00 | 2,00 | 2,00 | 2,00 | 2,00 | #NULL! | #NULL! |
| 45,00 | 1,00 | 2,00 | 2,00 | 2,00 | 2,00 | 2,00 | #NULL! | #NULL! |
| 56,00 | 1,00 | 1,00 | 2,00 | 2,00 | 2,00 | 2,00 | #NULL! | #NULL! |
| 49,00 | 1,00 | 2,00 | 2,00 | 2,00 | 2,00 | 2,00 | #NULL! | #NULL! |
| 49,00 | 1,00 | 2,00 | 2,00 | 2,00 | 2,00 | 2,00 | #NULL! | #NULL! |
| 48,00 | 1,00 | 2,00 | 2,00 | 2,00 | 2,00 | 2,00 | #NULL! | #NULL! |
| 45,00 | 2,00 | 2,00 | 2,00 | 2,00 | 2,00 | 1,00 | 25,00  | #NULL! |
| 46,00 | 2,00 | 2,00 | 2,00 | 2,00 | 2,00 | 2,00 | #NULL! | #NULL! |
| 56,00 | 2,00 | 1,00 | 2,00 | 2,00 | 2,00 | 2,00 | #NULL! | #NULL! |
| 60,00 | 1,00 | 2,00 | 2,00 | 2,00 | 2,00 | 2,00 | #NULL! | #NULL! |
| 55,00 | 2,00 | 2,00 | 2,00 | 2,00 | 1,00 | 2,00 | #NULL! | #NULL! |
| 60,00 | 1,00 | 1,00 | 2,00 | 2,00 | 2,00 | 2,00 | #NULL! | #NULL! |
| 62,00 | 1,00 | 2,00 | 1,00 | 1,00 | 2,00 | 2,00 | #NULL! | #NULL! |
| 62,00 | 2,00 | 1,00 | 1,00 | 2,00 | 2,00 | 2,00 | #NULL! | #NULL! |
| 47,00 | 1,00 | 1,00 | 2,00 | 2,00 | 2,00 | 2,00 | #NULL! | #NULL! |
| 73,00 | 2,00 | 1,00 | 1,00 | 2,00 | 2,00 | 2,00 | #NULL! | #NULL! |
| 54,00 | 2,00 | 2,00 | 2,00 | 2,00 | 1,00 | 2,00 | #NULL! | #NULL! |
| 52,00 | 1,00 | 1,00 | 2,00 | 2,00 | 2,00 | 2,00 | #NULL! | #NULL! |
| 56,00 | 2,00 | 1,00 | 2,00 | 2,00 | 2,00 | 2,00 | #NULL! | #NULL! |
| 48,00 | 2,00 | 2,00 | 2,00 | 2,00 | 2,00 | 2,00 | #NULL! | #NULL! |
| 57,00 | 1,00 | 1,00 | 2,00 | 1,00 | 2,00 | 2,00 | #NULL! | #NULL! |
| 56,00 | 2,00 | 1,00 | 2,00 | 2,00 | 2,00 | 2,00 | #NULL! | #NULL! |
| 63,00 | 2,00 | 1,00 | 2,00 | 1,00 | 1,00 | 2,00 | #NULL! | #NULL! |
| 62,00 | 2,00 | 1,00 | 2,00 | 2,00 | 2,00 | 2,00 | #NULL! | #NULL! |
| 57,00 | 2,00 | 2,00 | 2,00 | 2,00 | 2,00 | 2,00 | #NULL! | #NULL! |
| 50,00 | 1,00 | 2,00 | 2,00 | 2,00 | 2,00 | 1,00 | 25,00  | #NULL! |
| 45,00 | 2,00 | 2,00 | 2,00 | 2,00 | 2,00 | 2,00 | #NULL! | #NULL! |
| 51,00 | 2,00 | 1,00 | 2,00 | 2,00 | 2,00 | 2,00 | #NULL! | #NULL! |
| 68,00 | 1,00 | 1,00 | 2,00 | 2,00 | 1,00 | 2,00 | #NULL! | #NULL! |
| 58,00 | 2,00 | 1,00 | 2,00 | 2,00 | 2,00 | 2,00 | #NULL! | #NULL! |
| 59,00 | 2,00 | 1,00 | 2,00 | 2,00 | 2,00 | 2,00 | #NULL! | #NULL! |
| 65,00 | 1,00 | 1,00 | 1,00 | 2,00 | 2,00 | 2,00 | #NULL! | #NULL! |
| 48,00 | 1,00 | 2,00 | 2,00 | 2,00 | 1,00 | 2,00 | #NULL! | #NULL! |
| 55,00 | 1,00 | 1,00 | 2,00 | 2,00 | 2,00 | 2,00 | #NULL! | #NULL! |
| 50,00 | 1,00 | 1,00 | 2,00 | 2,00 | 2,00 | 2,00 | 20,00  | 10,00  |











|       |      |      |      |      |      |      |        |        |
|-------|------|------|------|------|------|------|--------|--------|
| 45,00 | 2,00 | 2,00 | 2,00 | 2,00 | 2,00 | 2,00 | #NULL! | #NULL! |
| 65,00 | 2,00 | 2,00 | 2,00 | 2,00 | 2,00 | 2,00 | #NULL! | #NULL! |
| 45,00 | 1,00 | 2,00 | 2,00 | 2,00 | 2,00 | 2,00 | #NULL! | #NULL! |
| 46,00 | 1,00 | 2,00 | 2,00 | 2,00 | 2,00 | 2,00 | #NULL! | #NULL! |
| 45,00 | 1,00 | 2,00 | 2,00 | 2,00 | 2,00 | 2,00 | #NULL! | #NULL! |
| 45,00 | 2,00 | 2,00 | 2,00 | 2,00 | 2,00 | 1,00 | 20,00  | #NULL! |
| 46,00 | 2,00 | 2,00 | 2,00 | 2,00 | 2,00 | 2,00 | #NULL! | #NULL! |
| 45,00 | 2,00 | 2,00 | 2,00 | 2,00 | 2,00 | 2,00 | #NULL! | #NULL! |
| 46,00 | 1,00 | 2,00 | 1,00 | 2,00 | 2,00 | 2,00 | #NULL! | #NULL! |
| 52,00 | 1,00 | 2,00 | 2,00 | 2,00 | 1,00 | 2,00 | #NULL! | #NULL! |
| 45,00 | 2,00 | 2,00 | 2,00 | 2,00 | 1,00 | 2,00 | #NULL! | #NULL! |
| 48,00 | 2,00 | 2,00 | 2,00 | 2,00 | 2,00 | 2,00 | #NULL! | #NULL! |
| 52,00 | 1,00 | 1,00 | 2,00 | 2,00 | 2,00 | 2,00 | #NULL! | #NULL! |
| 58,00 | 1,00 | 1,00 | 2,00 | 2,00 | 2,00 | 2,00 | #NULL! | #NULL! |
| 58,00 | 1,00 | 1,00 | 1,00 | 2,00 | 2,00 | 2,00 | #NULL! | #NULL! |
| 45,00 | 2,00 | 2,00 | 2,00 | 2,00 | 2,00 | 2,00 | #NULL! | #NULL! |
| 58,00 | 1,00 | 1,00 | 2,00 | 2,00 | 2,00 | 2,00 | #NULL! | #NULL! |
| 52,00 | 2,00 | 1,00 | 2,00 | 1,00 | 1,00 | 2,00 | #NULL! | #NULL! |
| 54,00 | 1,00 | 2,00 | 1,00 | 2,00 | 2,00 | 2,00 | #NULL! | #NULL! |
| 58,00 | 2,00 | 1,00 | 2,00 | 1,00 | 2,00 | 2,00 | #NULL! | #NULL! |
| 60,00 | 1,00 | 2,00 | 2,00 | 2,00 | 2,00 | 2,00 | #NULL! | #NULL! |
| 52,00 | 1,00 | 2,00 | 2,00 | 2,00 | 2,00 | 1,00 | 80,00  | #NULL! |
| 62,00 | 2,00 | 2,00 | 2,00 | 2,00 | 2,00 | 1,00 | 15,00  | #NULL! |
| 45,00 | 1,00 | 2,00 | 2,00 | 2,00 | 2,00 | 1,00 | 30,00  | #NULL! |
| 47,00 | 1,00 | 1,00 | 1,00 | 2,00 | 2,00 | 1,00 | 15,00  | #NULL! |
| 52,00 | 1,00 | 2,00 | 2,00 | 2,00 | 2,00 | 1,00 | 40,00  | #NULL! |
| 54,00 | 2,00 | 2,00 | 2,00 | 2,00 | 2,00 | 2,00 | #NULL! | #NULL! |
| 54,00 | 2,00 | 1,00 | 2,00 | 1,00 | 2,00 | 2,00 | #NULL! | #NULL! |
| 60,00 | 1,00 | 1,00 | 2,00 | 1,00 | 1,00 | 2,00 | #NULL! | #NULL! |
| 45,00 | 1,00 | 2,00 | 2,00 | 2,00 | 2,00 | 1,00 | 15,00  | #NULL! |
| 48,00 | 2,00 | 2,00 | 2,00 | 2,00 | 2,00 | 2,00 | #NULL! | #NULL! |
| 48,00 | 1,00 | 2,00 | 2,00 | 2,00 | 2,00 | 2,00 | #NULL! | #NULL! |
| 52,00 | 2,00 | 2,00 | 2,00 | 2,00 | 2,00 | 2,00 | #NULL! | #NULL! |
| 54,00 | 2,00 | 1,00 | 1,00 | 1,00 | 1,00 | 2,00 | #NULL! | #NULL! |
| 56,00 | 2,00 | 1,00 | 2,00 | 2,00 | 2,00 | 2,00 | #NULL! | #NULL! |
| 45,00 | 2,00 | 2,00 | 2,00 | 2,00 | 2,00 | 2,00 | #NULL! | #NULL! |
| 52,00 | 1,00 | 1,00 | 2,00 | 1,00 | 2,00 | 2,00 | #NULL! | #NULL! |
| 48,00 | 2,00 | 1,00 | 2,00 | 2,00 | 2,00 | 1,00 | 30,00  | #NULL! |
| 45,00 | 2,00 | 1,00 | 1,00 | 2,00 | 2,00 | 2,00 | #NULL! | #NULL! |
| 46,00 | 1,00 | 2,00 | 2,00 | 2,00 | 2,00 | 1,00 | 30,00  | #NULL! |
| 48,00 | 2,00 | 1,00 | 1,00 | 2,00 | 2,00 | 2,00 | #NULL! | #NULL! |
| 45,00 | 2,00 | 2,00 | 2,00 | 2,00 | 2,00 | 2,00 | #NULL! | #NULL! |
| 47,00 | 1,00 | 1,00 | 1,00 | 1,00 | 1,00 | 2,00 | #NULL! | #NULL! |
| 46,00 | 2,00 | 2,00 | 2,00 | 2,00 | 2,00 | 2,00 | #NULL! | #NULL! |
| 49,00 | 1,00 | 2,00 | 2,00 | 2,00 | 2,00 | 2,00 | 30,00  | 8,00   |
| 80,00 | 2,00 | 1,00 | 2,00 | 2,00 | 2,00 | 1,00 | 40,00  | #NULL! |
| 45,00 | 1,00 | 2,00 | 2,00 | 2,00 | 2,00 | 2,00 | #NULL! | #NULL! |
| 52,00 | 2,00 | 1,00 | 2,00 | 1,00 | 1,00 | 2,00 | #NULL! | #NULL! |
| 50,00 | 2,00 | 2,00 | 2,00 | 2,00 | 2,00 | 2,00 | #NULL! | #NULL! |
| 52,00 | 1,00 | 2,00 | 2,00 | 2,00 | 2,00 | 1,00 | 30,00  | 15,00  |















|       |      |      |       |      |      |      |        |        |
|-------|------|------|-------|------|------|------|--------|--------|
| 72,00 | 1,00 | 1,00 | 2,00  | 1,00 | 2,00 | 2,00 | #NULL! | #NULL! |
| 78,00 | 1,00 | 1,00 | 2,00  | 2,00 | 1,00 | 2,00 | #NULL! | #NULL! |
| 66,00 | 2,00 | 1,00 | 1,00  | 2,00 | 1,00 | 2,00 | #NULL! | #NULL! |
| 77,00 | 1,00 | 1,00 | 2,00  | 2,00 | 2,00 | 2,00 | #NULL! | #NULL! |
| 46,00 | 1,00 | 2,00 | 2,00  | 2,00 | 2,00 | 2,00 | #NULL! | #NULL! |
| 50,00 | 1,00 | 2,00 | 2,00  | 2,00 | 2,00 | 1,00 | 30,00  | #NULL! |
| 55,00 | 2,00 | 2,00 | 2,00  | 2,00 | 2,00 | 2,00 | #NULL! | #NULL! |
| 50,00 | 2,00 | 1,00 | 2,00  | 2,00 | 2,00 | 2,00 | #NULL! | #NULL! |
| 45,00 | 2,00 | 2,00 | 2,00  | 2,00 | 2,00 | 2,00 | #NULL! | #NULL! |
| 55,00 | 2,00 | 2,00 | 2,00  | 2,00 | 1,00 | 2,00 | #NULL! | #NULL! |
| 58,00 | 1,00 | 2,00 | 2,00  | 2,00 | 1,00 | 2,00 | #NULL! | #NULL! |
| 46,00 | 2,00 | 1,00 | 2,00  | 2,00 | 2,00 | 2,00 | #NULL! | #NULL! |
| 48,00 | 1,00 | 2,00 | 2,00  | 2,00 | 2,00 | 2,00 | #NULL! | #NULL! |
| 45,00 | 1,00 | 2,00 | 2,00  | 2,00 | 2,00 | 2,00 | #NULL! | #NULL! |
| 63,00 | 1,00 | 1,00 | 2,00  | 2,00 | 2,00 | 2,00 | #NULL! | #NULL! |
| 86,00 | 2,00 | 1,00 | 1,00  | 1,00 | 1,00 | 2,00 | #NULL! | #NULL! |
| 69,00 | 1,00 | 2,00 | 1,00  | 2,00 | 2,00 | 1,00 | 3,00   | #NULL! |
| 84,00 | 2,00 | 1,00 | 2,00  | 2,00 | 2,00 | 2,00 | #NULL! | #NULL! |
| 65,00 | 2,00 | 2,00 | 2,00  | 2,00 | 2,00 | 2,00 | #NULL! | #NULL! |
| 55,00 | 1,00 | 2,00 | 2,00  | 2,00 | 2,00 | 1,00 | 15,00  | #NULL! |
| 74,00 | 2,00 | 2,00 | 1,00  | 1,00 | 1,00 | 2,00 | #NULL! | #NULL! |
| 66,00 | 1,00 | 1,00 | 2,00  | 2,00 | 2,00 | 1,00 | 20,00  | #NULL! |
| 69,00 | 2,00 | 2,00 | 2,00  | 2,00 | 1,00 | 2,00 | #NULL! | #NULL! |
| 76,00 | 1,00 | 2,00 | 2,00  | 2,00 | 2,00 | 2,00 | #NULL! | #NULL! |
| 79,00 | 2,00 | 2,00 | 1,00  | 1,00 | 2,00 | 2,00 | #NULL! | #NULL! |
| 53,00 | 2,00 | 2,00 | 2,00  | 2,00 | 1,00 | 2,00 | #NULL! | #NULL! |
| 76,00 | 2,00 | 1,00 | 2,00  | 1,00 | 2,00 | 2,00 | #NULL! | #NULL! |
| 84,00 | 1,00 | 1,00 | 1,00  | 2,00 | 2,00 | 2,00 | #NULL! | #NULL! |
| 45,00 | 2,00 | 2,00 | 2,00  | 2,00 | 2,00 | 2,00 | #NULL! | #NULL! |
| 47,00 | 2,00 | 2,00 | 2,00  | 2,00 | 2,00 | 1,00 | 10,00  | #NULL! |
| 54,00 | 1,00 | 2,00 | 2,00  | 2,00 | 2,00 | 1,00 | 15,00  | #NULL! |
| 54,00 | 1,00 | 2,00 | 2,00  | 2,00 | 2,00 | 2,00 | #NULL! | #NULL! |
| 73,00 | 2,00 | 2,00 | 1,00  | 2,00 | 1,00 | 2,00 | #NULL! | #NULL! |
| 68,00 | 2,00 | 1,00 | 1,00  | 2,00 | 2,00 | 2,00 | #NULL! | #NULL! |
| 75,00 | 2,00 | 1,00 | 2,00  | 2,00 | 2,00 | 2,00 | #NULL! | #NULL! |
| 50,00 | 2,00 | 2,00 | 2,00  | 2,00 | 2,00 | 1,00 | 5,00   | #NULL! |
| 45,00 | 2,00 | 2,00 | 2,00  | 2,00 | 2,00 | 1,00 | 2,00   | #NULL! |
| 53,00 | 2,00 | 1,00 | 22,00 | 2,00 | 2,00 | 2,00 | #NULL! | #NULL! |
| 78,00 | 2,00 | 1,00 | 1,00  | 2,00 | 2,00 | 2,00 | #NULL! | #NULL! |
| 72,00 | 1,00 | 2,00 | 1,00  | 2,00 | 2,00 | 2,00 | #NULL! | #NULL! |
| 59,00 | 2,00 | 2,00 | 2,00  | 1,00 | 2,00 | 2,00 | #NULL! | #NULL! |
| 63,00 | 1,00 | 2,00 | 1,00  | 2,00 | 2,00 | 2,00 | #NULL! | #NULL! |
| 59,00 | 1,00 | 1,00 | 2,00  | 1,00 | 1,00 | 1,00 | 30,00  | #NULL! |
| 53,00 | 2,00 | 2,00 | 2,00  | 2,00 | 2,00 | 2,00 | #NULL! | #NULL! |
| 62,00 | 1,00 | 1,00 | 2,00  | 1,00 | 2,00 | 2,00 | #NULL! | #NULL! |
| 72,00 | 2,00 | 1,00 | 2,00  | 2,00 | 2,00 | 2,00 | #NULL! | #NULL! |
| 45,00 | 2,00 | 2,00 | 2,00  | 2,00 | 2,00 | 2,00 | #NULL! | #NULL! |
| 56,00 | 2,00 | 2,00 | 2,00  | 2,00 | 2,00 | 2,00 | #NULL! | #NULL! |
| 51,00 | 2,00 | 2,00 | 2,00  | 2,00 | 2,00 | 2,00 | #NULL! | #NULL! |
| 58,00 | 2,00 | 1,00 | 1,00  | 2,00 | 2,00 | 2,00 | #NULL! | #NULL! |



|       |      |      |      |      |      |      |        |        |
|-------|------|------|------|------|------|------|--------|--------|
| 61,00 | 2,00 | 1,00 | 2,00 | 2,00 | 2,00 | 2,00 | #NULL! | #NULL! |
| 59,00 | 1,00 | 1,00 | 2,00 | 2,00 | 2,00 | 2,00 | #NULL! | #NULL! |
| 59,00 | 1,00 | 1,00 | 1,00 | 2,00 | 2,00 | 2,00 | #NULL! | #NULL! |
| 62,00 | 1,00 | 2,00 | 2,00 | 1,00 | 2,00 | 2,00 | #NULL! | #NULL! |
| 79,00 | 2,00 | 2,00 | 2,00 | 1,00 | 1,00 | 2,00 | #NULL! | #NULL! |
| 45,00 | 1,00 | 2,00 | 2,00 | 2,00 | 2,00 | 1,00 | 20,00  | #NULL! |
| 51,00 | 2,00 | 2,00 | 1,00 | 2,00 | 1,00 | 2,00 | #NULL! | #NULL! |
| 51,00 | 2,00 | 1,00 | 2,00 | 2,00 | 2,00 | 2,00 | #NULL! | #NULL! |
| 59,00 | 1,00 | 2,00 | 1,00 | 2,00 | 1,00 | 2,00 | #NULL! | #NULL! |
| 55,00 | 1,00 | 2,00 | 1,00 | 2,00 | 1,00 | 2,00 | #NULL! | #NULL! |
| 66,00 | 2,00 | 1,00 | 2,00 | 2,00 | 2,00 | 2,00 | #NULL! | #NULL! |
| 68,00 | 2,00 | 1,00 | 2,00 | 1,00 | 2,00 | 2,00 | #NULL! | #NULL! |
| 48,00 | 1,00 | 1,00 | 2,00 | 2,00 | 2,00 | 2,00 | #NULL! | #NULL! |
| 65,00 | 1,00 | 2,00 | 2,00 | 2,00 | 2,00 | 2,00 | #NULL! | #NULL! |
| 65,00 | 1,00 | 1,00 | 2,00 | 1,00 | 2,00 | 2,00 | 15,00  | 10,00  |
| 87,00 | 2,00 | 1,00 | 1,00 | 2,00 | 2,00 | 1,00 | #NULL! | #NULL! |
| 52,00 | 2,00 | 1,00 | 2,00 | 2,00 | 2,00 | 2,00 | #NULL! | #NULL! |
| 76,00 | 2,00 | 1,00 | 1,00 | 2,00 | 2,00 | 2,00 | #NULL! | #NULL! |
| 67,00 | 2,00 | 1,00 | 1,00 | 2,00 | 2,00 | 2,00 | #NULL! | #NULL! |
| 55,00 | 2,00 | 2,00 | 2,00 | 2,00 | 2,00 | 2,00 | #NULL! | #NULL! |
| 73,00 | 2,00 | 1,00 | 2,00 | 2,00 | 2,00 | 2,00 | #NULL! | #NULL! |
| 72,00 | 2,00 | 2,00 | 2,00 | 2,00 | 2,00 | 2,00 | #NULL! | #NULL! |
| 78,00 | 1,00 | 2,00 | 2,00 | 2,00 | 2,00 | 2,00 | #NULL! | #NULL! |
| 45,00 | 2,00 | 2,00 | 2,00 | 2,00 | 2,00 | 2,00 | #NULL! | #NULL! |
| 50,00 | 1,00 | 2,00 | 2,00 | 2,00 | 2,00 | 2,00 | #NULL! | #NULL! |
| 73,00 | 2,00 | 2,00 | 2,00 | 1,00 | 2,00 | 2,00 | #NULL! | #NULL! |
| 72,00 | 1,00 | 2,00 | 2,00 | 1,00 | 2,00 | 2,00 | #NULL! | #NULL! |
| 80,00 | 2,00 | 1,00 | 2,00 | 2,00 | 2,00 | 2,00 | #NULL! | #NULL! |
| 86,00 | 2,00 | 1,00 | 1,00 | 1,00 | 2,00 | 2,00 | #NULL! | #NULL! |
| 59,00 | 1,00 | 2,00 | 2,00 | 2,00 | 2,00 | 2,00 | #NULL! | #NULL! |
| 55,00 | 2,00 | 2,00 | 2,00 | 2,00 | 2,00 | 2,00 | #NULL! | #NULL! |
| 45,00 | 2,00 | 2,00 | 2,00 | 2,00 | 2,00 | 2,00 | #NULL! | #NULL! |
| 45,00 | 1,00 | 2,00 | 2,00 | 2,00 | 2,00 | 2,00 | #NULL! | #NULL! |
| 45,00 | 1,00 | 2,00 | 2,00 | 2,00 | 2,00 | 2,00 | #NULL! | #NULL! |
| 46,00 | 1,00 | 2,00 | 2,00 | 2,00 | 2,00 | 2,00 | #NULL! | #NULL! |
| 49,00 | 2,00 | 2,00 | 2,00 | 2,00 | 2,00 | 2,00 | #NULL! | #NULL! |
| 45,00 | 1,00 | 2,00 | 2,00 | 2,00 | 2,00 | 2,00 | #NULL! | #NULL! |
| 60,00 | 2,00 | 2,00 | 2,00 | 2,00 | 2,00 | 2,00 | #NULL! | #NULL! |
| 46,00 | 1,00 | 1,00 | 2,00 | 2,00 | 2,00 | 2,00 | #NULL! | #NULL! |
| 49,00 | 1,00 | 2,00 | 2,00 | 2,00 | 2,00 | 2,00 | #NULL! | #NULL! |
| 45,00 | 1,00 | 2,00 | 2,00 | 2,00 | 2,00 | 2,00 | #NULL! | #NULL! |
| 60,00 | 1,00 | 2,00 | 2,00 | 2,00 | 2,00 | 1,00 | 30,00  | #NULL! |
| 56,00 | 2,00 | 1,00 | 2,00 | 2,00 | 2,00 | 2,00 | #NULL! | #NULL! |
| 64,00 | 2,00 | 1,00 | 2,00 | 2,00 | 2,00 | 1,00 | 10,00  | #NULL! |
| 66,00 | 2,00 | 1,00 | 2,00 | 2,00 | 1,00 | 2,00 | #NULL! | #NULL! |
| 66,00 | 1,00 | 2,00 | 2,00 | 2,00 | 2,00 | 2,00 | #NULL! | #NULL! |
| 71,00 | 2,00 | 1,00 | 2,00 | 1,00 | 2,00 | 1,00 | 50,00  | #NULL! |
| 48,00 | 2,00 | 1,00 | 2,00 | 2,00 | 2,00 | 2,00 | #NULL! | #NULL! |
| 54,00 | 1,00 | 1,00 | 2,00 | 1,00 | 2,00 | 1,00 | 30,00  | #NULL! |
| 54,00 | 1,00 | 1,00 | 2,00 | 2,00 | 2,00 | 2,00 | #NULL! | #NULL! |



|       |      |      |      |      |      |      |        |        |
|-------|------|------|------|------|------|------|--------|--------|
| 55,00 | 1,00 | 2,00 | 2,00 | 2,00 | 2,00 | 1,00 | 30,00  | #NULL! |
| 60,00 | 1,00 | 2,00 | 2,00 | 2,00 | 2,00 | 2,00 | #NULL! | #NULL! |
| 65,00 | 1,00 | 2,00 | 2,00 | 2,00 | 2,00 | 2,00 | #NULL! | #NULL! |
| 85,00 | 2,00 | 2,00 | 2,00 | 2,00 | 2,00 | 2,00 | #NULL! | #NULL! |
| 62,00 | 1,00 | 2,00 | 2,00 | 2,00 | 2,00 | 2,00 | #NULL! | #NULL! |
| 50,00 | 1,00 | 2,00 | 2,00 | 2,00 | 2,00 | 2,00 | #NULL! | #NULL! |
| 45,00 | 2,00 | 2,00 | 2,00 | 2,00 | 2,00 | 2,00 | #NULL! | #NULL! |
| 55,00 | 2,00 | 2,00 | 2,00 | 2,00 | 2,00 | 1,00 | 15,00  | #NULL! |
| 62,00 | 1,00 | 2,00 | 2,00 | 2,00 | 2,00 | 2,00 | #NULL! | #NULL! |
| 65,00 | 1,00 | 2,00 | 2,00 | 2,00 | 2,00 | 2,00 | #NULL! | #NULL! |
| 60,00 | 1,00 | 2,00 | 2,00 | 2,00 | 2,00 | 2,00 | #NULL! | #NULL! |
| 70,00 | 2,00 | 2,00 | 2,00 | 2,00 | 2,00 | 2,00 | #NULL! | #NULL! |
| 62,00 | 1,00 | 1,00 | 2,00 | 2,00 | 2,00 | 1,00 | 18,00  | #NULL! |
| 71,00 | 1,00 | 2,00 | 2,00 | 2,00 | 2,00 | 1,00 | 50,00  | #NULL! |
| 78,00 | 1,00 | 2,00 | 2,00 | 2,00 | 2,00 | 2,00 | #NULL! | #NULL! |
| 58,00 | 1,00 | 1,00 | 1,00 | 2,00 | 2,00 | 2,00 | 20,00  | 3,00   |
| 54,00 | 2,00 | 1,00 | 2,00 | 2,00 | 1,00 | 2,00 | #NULL! | #NULL! |
| 46,00 | 2,00 | 2,00 | 2,00 | 2,00 | 2,00 | 2,00 | #NULL! | #NULL! |
| 49,00 | 2,00 | 1,00 | 2,00 | 2,00 | 2,00 | 2,00 | #NULL! | #NULL! |
| 55,00 | 1,00 | 2,00 | 2,00 | 1,00 | 2,00 | 2,00 | #NULL! | #NULL! |
| 50,00 | 2,00 | 2,00 | 2,00 | 2,00 | 2,00 | 2,00 | #NULL! | #NULL! |
| 51,00 | 1,00 | 2,00 | 2,00 | 1,00 | 2,00 | 2,00 | #NULL! | #NULL! |
| 55,00 | 1,00 | 2,00 | 2,00 | 1,00 | 2,00 | 2,00 | #NULL! | #NULL! |
| 49,00 | 1,00 | 1,00 | 2,00 | 2,00 | 1,00 | 1,00 | 11,00  | #NULL! |
| 45,00 | 2,00 | 2,00 | 2,00 | 2,00 | 2,00 | 2,00 | #NULL! | #NULL! |
| 62,00 | 1,00 | 1,00 | 2,00 | 2,00 | 2,00 | 2,00 | #NULL! | #NULL! |
| 58,00 | 2,00 | 2,00 | 2,00 | 2,00 | 2,00 | 2,00 | #NULL! | #NULL! |
| 57,00 | 2,00 | 2,00 | 1,00 | 2,00 | 2,00 | 2,00 | #NULL! | #NULL! |
| 69,00 | 1,00 | 1,00 | 2,00 | 2,00 | 2,00 | 2,00 | #NULL! | #NULL! |
| 55,00 | 1,00 | 2,00 | 2,00 | 2,00 | 2,00 | 2,00 | #NULL! | #NULL! |
| 56,00 | 2,00 | 2,00 | 2,00 | 2,00 | 2,00 | 2,00 | #NULL! | #NULL! |
| 79,00 | 1,00 | 2,00 | 2,00 | 2,00 | 2,00 | 2,00 | #NULL! | #NULL! |
| 72,00 | 2,00 | 1,00 | 2,00 | 2,00 | 2,00 | 2,00 | #NULL! | #NULL! |
| 86,00 | 1,00 | 1,00 | 1,00 | 2,00 | 2,00 | 2,00 | #NULL! | #NULL! |
| 76,00 | 2,00 | 1,00 | 2,00 | 2,00 | 2,00 | 2,00 | #NULL! | #NULL! |
| 58,00 | 2,00 | 1,00 | 2,00 | 2,00 | 2,00 | 2,00 | #NULL! | #NULL! |
| 65,00 | 1,00 | 1,00 | 1,00 | 2,00 | 2,00 | 2,00 | #NULL! | #NULL! |
| 76,00 | 2,00 | 1,00 | 1,00 | 2,00 | 2,00 | 2,00 | #NULL! | #NULL! |
| 60,00 | 1,00 | 2,00 | 2,00 | 2,00 | 2,00 | 2,00 | #NULL! | #NULL! |
| 64,00 | 1,00 | 1,00 | 2,00 | 2,00 | 2,00 | 1,00 | 20,00  | #NULL! |
| 45,00 | 2,00 | 2,00 | 2,00 | 2,00 | 2,00 | 1,00 | 10,00  | #NULL! |
| 62,00 | 2,00 | 2,00 | 1,00 | 2,00 | 1,00 | 2,00 | #NULL! | #NULL! |
| 59,00 | 1,00 | 1,00 | 2,00 | 2,00 | 1,00 | 1,00 | 20,00  | #NULL! |
| 62,00 | 1,00 | 1,00 | 2,00 | 1,00 | 2,00 | 2,00 | #NULL! | #NULL! |
| 59,00 | 2,00 | 1,00 | 2,00 | 1,00 | 2,00 | 2,00 | #NULL! | #NULL! |
| 59,00 | 2,00 | 1,00 | 2,00 | 2,00 | 2,00 | 2,00 | #NULL! | #NULL! |
| 60,00 | 2,00 | 1,00 | 2,00 | 2,00 | 2,00 | 2,00 | #NULL! | #NULL! |
| 69,00 | 2,00 | 1,00 | 2,00 | 1,00 | 2,00 | 1,00 | 15,00  | #NULL! |
| 64,00 | 1,00 | 1,00 | 2,00 | 2,00 | 2,00 | 2,00 | #NULL! | #NULL! |
| 45,00 | 2,00 | 2,00 | 2,00 | 2,00 | 2,00 | 2,00 | #NULL! | #NULL! |





|       |      |      |       |      |      |      |        |        |
|-------|------|------|-------|------|------|------|--------|--------|
| 49,00 | 2,00 | 1,00 | 2,00  | 2,00 | 2,00 | 2,00 | #NULL! | #NULL! |
| 47,00 | 1,00 | 2,00 | 2,00  | 2,00 | 2,00 | 2,00 | #NULL! | #NULL! |
| 51,00 | 2,00 | 2,00 | 2,00  | 2,00 | 1,00 | 2,00 | #NULL! | #NULL! |
| 58,00 | 1,00 | 2,00 | 2,00  | 1,00 | 2,00 | 1,00 | 15,00  | #NULL! |
| 46,00 | 2,00 | 2,00 | 2,00  | 2,00 | 2,00 | 2,00 | #NULL! | #NULL! |
| 45,00 | 1,00 | 2,00 | 22,00 | 2,00 | 2,00 | 1,00 | 10,00  | #NULL! |
| 55,00 | 2,00 | 1,00 | 2,00  | 2,00 | 2,00 | 2,00 | #NULL! | #NULL! |
| 45,00 | 1,00 | 2,00 | 2,00  | 2,00 | 2,00 | 2,00 | #NULL! | #NULL! |
| 59,00 | 1,00 | 1,00 | 2,00  | 2,00 | 1,00 | 2,00 | #NULL! | #NULL! |
| 50,00 | 2,00 | 1,00 | 2,00  | 2,00 | 2,00 | 2,00 | #NULL! | #NULL! |
| 57,00 | 1,00 | 1,00 | 2,00  | 1,00 | 2,00 | 1,00 | 80,00  | #NULL! |
| 49,00 | 2,00 | 2,00 | 2,00  | 2,00 | 2,00 | 2,00 | #NULL! | #NULL! |
| 59,00 | 1,00 | 2,00 | 2,00  | 1,00 | 2,00 | 1,00 | 15,00  | #NULL! |
| 72,00 | 2,00 | 2,00 | 2,00  | 1,00 | 2,00 | 2,00 | #NULL! | #NULL! |
| 45,00 | 2,00 | 2,00 | 2,00  | 2,00 | 2,00 | 2,00 | #NULL! | #NULL! |
| 85,00 | 2,00 | 1,00 | 2,00  | 2,00 | 2,00 | 2,00 | #NULL! | #NULL! |
| 52,00 | 1,00 | 2,00 | 2,00  | 2,00 | 2,00 | 1,00 | 8,00   | #NULL! |
| 45,00 | 2,00 | 2,00 | 2,00  | 2,00 | 2,00 | 2,00 | #NULL! | #NULL! |
| 58,00 | 1,00 | 1,00 | 2,00  | 2,00 | 2,00 | 1,00 | 15,00  | #NULL! |
| 78,00 | 1,00 | 1,00 | 2,00  | 1,00 | 2,00 | 2,00 | #NULL! | #NULL! |
| 48,00 | 2,00 | 2,00 | 2,00  | 2,00 | 2,00 | 2,00 | #NULL! | #NULL! |
| 78,00 | 1,00 | 1,00 | 2,00  | 2,00 | 2,00 | 2,00 | #NULL! | #NULL! |
| 79,00 | 2,00 | 1,00 | 1,00  | 2,00 | 2,00 | 2,00 | #NULL! | #NULL! |
| 49,00 | 1,00 | 2,00 | 2,00  | 2,00 | 2,00 | 1,00 | 30,00  | #NULL! |
| 73,00 | 2,00 | 1,00 | 2,00  | 1,00 | 2,00 | 2,00 | #NULL! | #NULL! |
| 45,00 | 2,00 | 2,00 | 2,00  | 2,00 | 2,00 | 2,00 | #NULL! | #NULL! |
| 46,00 | 1,00 | 2,00 | 2,00  | 2,00 | 2,00 | 1,00 | 6,00   | #NULL! |
| 45,00 | 2,00 | 2,00 | 2,00  | 2,00 | 2,00 | 2,00 | #NULL! | #NULL! |
| 51,00 | 2,00 | 2,00 | 2,00  | 2,00 | 2,00 | 2,00 | #NULL! | #NULL! |
| 76,00 | 2,00 | 1,00 | 2,00  | 1,00 | 2,00 | 2,00 | #NULL! | #NULL! |
| 46,00 | 2,00 | 2,00 | 2,00  | 2,00 | 2,00 | 2,00 | #NULL! | #NULL! |
| 54,00 | 1,00 | 2,00 | 2,00  | 2,00 | 2,00 | 2,00 | #NULL! | #NULL! |
| 56,00 | 1,00 | 1,00 | 2,00  | 2,00 | 2,00 | 2,00 | #NULL! | #NULL! |
| 46,00 | 2,00 | 2,00 | 2,00  | 2,00 | 2,00 | 1,00 | 4,00   | #NULL! |
| 47,00 | 2,00 | 2,00 | 2,00  | 2,00 | 2,00 | 2,00 | #NULL! | #NULL! |
| 75,00 | 2,00 | 1,00 | 1,00  | 2,00 | 2,00 | 2,00 | #NULL! | #NULL! |
| 78,00 | 1,00 | 1,00 | 2,00  | 1,00 | 1,00 | 1,00 | 40,00  | #NULL! |
| 59,00 | 1,00 | 1,00 | 2,00  | 1,00 | 2,00 | 2,00 | #NULL! | #NULL! |
| 52,00 | 2,00 | 2,00 | 1,00  | 2,00 | 2,00 | 2,00 | #NULL! | #NULL! |
| 49,00 | 1,00 | 2,00 | 2,00  | 2,00 | 2,00 | 1,00 | 25,00  | #NULL! |
| 54,00 | 1,00 | 1,00 | 2,00  | 2,00 | 2,00 | 2,00 | #NULL! | #NULL! |
| 45,00 | 2,00 | 2,00 | 2,00  | 2,00 | 2,00 | 1,00 | 15,00  | #NULL! |
| 55,00 | 2,00 | 1,00 | 2,00  | 2,00 | 2,00 | 2,00 | #NULL! | #NULL! |
| 82,00 | 1,00 | 1,00 | 1,00  | 2,00 | 2,00 | 2,00 | #NULL! | #NULL! |
| 67,00 | 2,00 | 1,00 | 1,00  | 2,00 | 1,00 | 2,00 | #NULL! | #NULL! |
| 47,00 | 1,00 | 2,00 | 2,00  | 2,00 | 2,00 | 2,00 | #NULL! | #NULL! |
| 80,00 | 1,00 | 1,00 | 1,00  | 1,00 | 1,00 | 1,00 | 80,00  | #NULL! |
| 49,00 | 2,00 | 2,00 | 2,00  | 2,00 | 2,00 | 2,00 | #NULL! | #NULL! |
| 52,00 | 1,00 | 2,00 | 2,00  | 2,00 | 2,00 | 2,00 | #NULL! | #NULL! |
| 80,00 | 1,00 | 1,00 | 2,00  | 1,00 | 1,00 | 1,00 | 10,00  | #NULL! |

|       |      |      |      |      |      |      |        |        |
|-------|------|------|------|------|------|------|--------|--------|
| 47,00 | 2,00 | 2,00 | 2,00 | 2,00 | 2,00 | 2,00 | #NULL! | #NULL! |
| 64,00 | 2,00 | 1,00 | 1,00 | 2,00 | 2,00 | 2,00 | #NULL! | #NULL! |
| 66,00 | 2,00 | 1,00 | 2,00 | 2,00 | 2,00 | 2,00 | #NULL! | #NULL! |
| 65,00 | 1,00 | 2,00 | 2,00 | 2,00 | 2,00 | 2,00 | #NULL! | #NULL! |
| 63,00 | 2,00 | 1,00 | 1,00 | 1,00 | 1,00 | 2,00 | #NULL! | #NULL! |
| 46,00 | 1,00 | 2,00 | 2,00 | 2,00 | 2,00 | 2,00 | #NULL! | #NULL! |
| 45,00 | 2,00 | 2,00 | 2,00 | 2,00 | 2,00 | 2,00 | #NULL! | #NULL! |
| 46,00 | 1,00 | 1,00 | 2,00 | 2,00 | 1,00 | 1,00 | 30,00  | #NULL! |
| 45,00 | 1,00 | 2,00 | 2,00 | 2,00 | 2,00 | 2,00 | #NULL! | #NULL! |
| 46,00 | 2,00 | 2,00 | 2,00 | 2,00 | 2,00 | 2,00 | #NULL! | #NULL! |
| 49,00 | 1,00 | 2,00 | 2,00 | 2,00 | 2,00 | 2,00 | #NULL! | #NULL! |
| 50,00 | 1,00 | 1,00 | 2,00 | 2,00 | 2,00 | 2,00 | #NULL! | #NULL! |
| 49,00 | 2,00 | 2,00 | 2,00 | 2,00 | 2,00 | 2,00 | #NULL! | #NULL! |
| 70,00 | 1,00 | 2,00 | 2,00 | 2,00 | 1,00 | 1,00 | 7,00   | #NULL! |
| 75,00 | 1,00 | 2,00 | 2,00 | 2,00 | 1,00 | 2,00 | #NULL! | #NULL! |
| 55,00 | 1,00 | 2,00 | 2,00 | 2,00 | 2,00 | 2,00 | #NULL! | #NULL! |
| 50,00 | 2,00 | 2,00 | 2,00 | 2,00 | 2,00 | 2,00 | #NULL! | #NULL! |
| 48,00 | 1,00 | 2,00 | 2,00 | 2,00 | 2,00 | 2,00 | #NULL! | #NULL! |
| 45,00 | 2,00 | 2,00 | 2,00 | 2,00 | 2,00 | 2,00 | #NULL! | #NULL! |
| 45,00 | 1,00 | 2,00 | 2,00 | 2,00 | 2,00 | 2,00 | #NULL! | #NULL! |
| 52,00 | 2,00 | 2,00 | 2,00 | 2,00 | 2,00 | 2,00 | #NULL! | #NULL! |
| 50,00 | 2,00 | 1,00 | 2,00 | 2,00 | 1,00 | 2,00 | #NULL! | #NULL! |
| 48,00 | 1,00 | 2,00 | 2,00 | 2,00 | 2,00 | 2,00 | #NULL! | #NULL! |
| 45,00 | 2,00 | 2,00 | 2,00 | 2,00 | 2,00 | 2,00 | #NULL! | #NULL! |
| 49,00 | 1,00 | 2,00 | 2,00 | 2,00 | 2,00 | 2,00 | #NULL! | #NULL! |
| 48,00 | 2,00 | 2,00 | 2,00 | 2,00 | 2,00 | 2,00 | #NULL! | #NULL! |
| 58,00 | 1,00 | 1,00 | 2,00 | 2,00 | 2,00 | 2,00 | #NULL! | #NULL! |
| 45,00 | 2,00 | 2,00 | 2,00 | 2,00 | 2,00 | 2,00 | #NULL! | #NULL! |
| 55,00 | 2,00 | 2,00 | 2,00 | 2,00 | 2,00 | 2,00 | #NULL! | #NULL! |
| 72,00 | 2,00 | 1,00 | 1,00 | 2,00 | 2,00 | 2,00 | #NULL! | #NULL! |
| 75,00 | 1,00 | 1,00 | 2,00 | 2,00 | 2,00 | 2,00 | #NULL! | #NULL! |
| 51,00 | 1,00 | 2,00 | 2,00 | 2,00 | 2,00 | 2,00 | #NULL! | #NULL! |
| 46,00 | 2,00 | 2,00 | 2,00 | 2,00 | 2,00 | 2,00 | #NULL! | #NULL! |
| 52,00 | 1,00 | 2,00 | 2,00 | 2,00 | 2,00 | 2,00 | #NULL! | #NULL! |
| 55,00 | 2,00 | 1,00 | 1,00 | 1,00 | 2,00 | 2,00 | #NULL! | #NULL! |
| 56,00 | 1,00 | 2,00 | 2,00 | 2,00 | 2,00 | 2,00 | #NULL! | #NULL! |
| 54,00 | 2,00 | 2,00 | 2,00 | 1,00 | 2,00 | 2,00 | #NULL! | #NULL! |
| 53,00 | 1,00 | 2,00 | 2,00 | 2,00 | 2,00 | 2,00 | #NULL! | #NULL! |
| 51,00 | 2,00 | 2,00 | 2,00 | 2,00 | 2,00 | 2,00 | #NULL! | #NULL! |
| 58,00 | 1,00 | 2,00 | 2,00 | 2,00 | 2,00 | 2,00 | #NULL! | #NULL! |
| 56,00 | 2,00 | 2,00 | 1,00 | 2,00 | 2,00 | 2,00 | #NULL! | #NULL! |
| 54,00 | 1,00 | 2,00 | 2,00 | 2,00 | 2,00 | 2,00 | #NULL! | #NULL! |
| 52,00 | 2,00 | 1,00 | 2,00 | 2,00 | 2,00 | 2,00 | #NULL! | #NULL! |
| 64,00 | 1,00 | 1,00 | 1,00 | 1,00 | 1,00 | 2,00 | #NULL! | #NULL! |
| 61,00 | 2,00 | 1,00 | 2,00 | 2,00 | 1,00 | 2,00 | #NULL! | #NULL! |
| 56,00 | 1,00 | 1,00 | 1,00 | 2,00 | 1,00 | 2,00 | #NULL! | #NULL! |
| 51,00 | 2,00 | 1,00 | 1,00 | 2,00 | 2,00 | 2,00 | #NULL! | #NULL! |
| 50,00 | 1,00 | 2,00 | 2,00 | 2,00 | 2,00 | 2,00 | #NULL! | #NULL! |
| 47,00 | 2,00 | 1,00 | 2,00 | 2,00 | 1,00 | 2,00 | #NULL! | #NULL! |
| 56,00 | 1,00 | 1,00 | 1,00 | 1,00 | 1,00 | 2,00 | #NULL! | #NULL! |

|       |      |      |      |      |      |      |        |        |
|-------|------|------|------|------|------|------|--------|--------|
| 53,00 | 2,00 | 2,00 | 2,00 | 2,00 | 2,00 | 2,00 | #NULL! | #NULL! |
| 50,00 | 1,00 | 2,00 | 2,00 | 2,00 | 2,00 | 2,00 | #NULL! | #NULL! |
| 47,00 | 2,00 | 1,00 | 2,00 | 2,00 | 1,00 | 2,00 | #NULL! | #NULL! |
| 72,00 | 1,00 | 1,00 | 2,00 | 2,00 | 2,00 | 2,00 | #NULL! | #NULL! |
| 53,00 | 1,00 | 1,00 | 2,00 | 2,00 | 1,00 | 2,00 | #NULL! | #NULL! |
| 60,00 | 1,00 | 1,00 | 2,00 | 2,00 | 2,00 | 2,00 | 10,00  | 6,00   |
| 63,00 | 1,00 | 1,00 | 2,00 | 2,00 | 2,00 | 2,00 | #NULL! | #NULL! |
| 60,00 | 1,00 | 2,00 | 2,00 | 2,00 | 2,00 | 1,00 | 30,00  | #NULL! |
| 55,00 | 2,00 | 1,00 | 2,00 | 1,00 | 1,00 | 2,00 | #NULL! | #NULL! |
| 53,00 | 1,00 | 2,00 | 2,00 | 2,00 | 2,00 | 1,00 | 10,00  | #NULL! |
| 53,00 | 2,00 | 2,00 | 2,00 | 2,00 | 2,00 | 2,00 | #NULL! | #NULL! |
| 59,00 | 1,00 | 1,00 | 1,00 | 2,00 | 1,00 | 2,00 | #NULL! | #NULL! |
| 54,00 | 2,00 | 1,00 | 1,00 | 2,00 | 2,00 | 2,00 | #NULL! | #NULL! |
| 50,00 | 1,00 | 2,00 | 2,00 | 2,00 | 2,00 | 2,00 | #NULL! | #NULL! |
| 54,00 | 1,00 | 2,00 | 2,00 | 2,00 | 2,00 | 2,00 | #NULL! | #NULL! |
| 62,00 | 1,00 | 2,00 | 2,00 | 2,00 | 2,00 | 2,00 | #NULL! | #NULL! |
| 56,00 | 2,00 | 2,00 | 2,00 | 2,00 | 2,00 | 2,00 | #NULL! | #NULL! |
| 80,00 | 1,00 | 1,00 | 2,00 | 2,00 | 2,00 | 2,00 | #NULL! | #NULL! |
| 45,00 | 2,00 | 2,00 | 2,00 | 2,00 | 2,00 | 2,00 | #NULL! | #NULL! |
| 55,00 | 1,00 | 1,00 | 2,00 | 2,00 | 2,00 | 2,00 | #NULL! | #NULL! |
| 54,00 | 1,00 | 1,00 | 2,00 | 2,00 | 1,00 | 2,00 | #NULL! | #NULL! |
| 76,00 | 1,00 | 2,00 | 2,00 | 2,00 | 2,00 | 2,00 | #NULL! | #NULL! |
| 73,00 | 2,00 | 1,00 | 2,00 | 2,00 | 1,00 | 2,00 | #NULL! | #NULL! |
| 80,00 | 2,00 | 1,00 | 2,00 | 2,00 | 2,00 | 2,00 | #NULL! | #NULL! |
| 54,00 | 1,00 | 2,00 | 2,00 | 2,00 | 2,00 | 2,00 | #NULL! | #NULL! |
| 48,00 | 1,00 | 2,00 | 2,00 | 2,00 | 2,00 | 2,00 | #NULL! | #NULL! |
| 60,00 | 1,00 | 2,00 | 2,00 | 2,00 | 2,00 | 2,00 | #NULL! | #NULL! |
| 47,00 | 1,00 | 2,00 | 2,00 | 2,00 | 2,00 | 2,00 | #NULL! | #NULL! |
| 73,00 | 1,00 | 2,00 | 2,00 | 2,00 | 2,00 | 2,00 | #NULL! | #NULL! |
| 70,00 | 1,00 | 2,00 | 2,00 | 2,00 | 2,00 | 2,00 | #NULL! | #NULL! |
| 65,00 | 2,00 | 2,00 | 2,00 | 2,00 | 2,00 | 2,00 | #NULL! | #NULL! |
| 50,00 | 1,00 | 2,00 | 2,00 | 2,00 | 2,00 | 2,00 | #NULL! | #NULL! |
| 45,00 | 2,00 | 1,00 | 2,00 | 2,00 | 2,00 | 2,00 | #NULL! | #NULL! |
| 51,00 | 2,00 | 1,00 | 2,00 | 2,00 | 1,00 | 2,00 | #NULL! | #NULL! |
| 56,00 | 2,00 | 2,00 | 2,00 | 2,00 | 2,00 | 2,00 | #NULL! | #NULL! |
| 70,00 | 1,00 | 1,00 | 2,00 | 2,00 | 2,00 | 1,00 | 25,00  | #NULL! |
| 63,00 | 1,00 | 1,00 | 2,00 | 2,00 | 2,00 | 2,00 | #NULL! | #NULL! |
| 68,00 | 1,00 | 1,00 | 1,00 | 2,00 | 2,00 | 2,00 | 40,00  | 5,00   |
| 66,00 | 2,00 | 2,00 | 2,00 | 2,00 | 2,00 | 2,00 | #NULL! | #NULL! |
| 46,00 | 1,00 | 2,00 | 2,00 | 2,00 | 2,00 | 2,00 | #NULL! | #NULL! |
| 66,00 | 1,00 | 1,00 | 2,00 | 1,00 | 1,00 | 2,00 | #NULL! | #NULL! |
| 52,00 | 2,00 | 2,00 | 2,00 | 2,00 | 2,00 | 2,00 | #NULL! | #NULL! |
| 46,00 | 1,00 | 2,00 | 2,00 | 1,00 | 2,00 | 2,00 | #NULL! | #NULL! |
| 41,00 | 2,00 | 2,00 | 2,00 | 2,00 | 2,00 | 1,00 | 10,00  | #NULL! |
| 56,00 | 1,00 | 1,00 | 1,00 | 2,00 | 2,00 | 2,00 | #NULL! | #NULL! |
| 65,00 | 2,00 | 1,00 | 2,00 | 1,00 | 2,00 | 2,00 | #NULL! | #NULL! |
| 76,00 | 1,00 | 1,00 | 2,00 | 2,00 | 2,00 | 2,00 | #NULL! | #NULL! |
| 50,00 | 2,00 | 2,00 | 2,00 | 2,00 | 2,00 | 1,00 | 60,00  | #NULL! |
| 56,00 | 1,00 | 2,00 | 2,00 | 2,00 | 2,00 | 1,00 | 25,00  | #NULL! |
| 60,00 | 2,00 | 1,00 | 1,00 | 1,00 | 1,00 | 2,00 | #NULL! | #NULL! |



|       |      |      |      |      |      |      |        |        |
|-------|------|------|------|------|------|------|--------|--------|
| 65,00 | 1,00 | 2,00 | 1,00 | 2,00 | 2,00 | 2,00 | #NULL! | #NULL! |
| 70,00 | 1,00 | 2,00 | 2,00 | 2,00 | 2,00 | 2,00 | #NULL! | #NULL! |
| 56,00 | 1,00 | 2,00 | 2,00 | 2,00 | 2,00 | 2,00 | #NULL! | #NULL! |
| 52,00 | 1,00 | 1,00 | 1,00 | 2,00 | 2,00 | 2,00 | #NULL! | #NULL! |
| 70,00 | 2,00 | 2,00 | 2,00 | 2,00 | 2,00 | 2,00 | #NULL! | #NULL! |
| 79,00 | 1,00 | 1,00 | 1,00 | 2,00 | 2,00 | 2,00 | 30,00  | 30,00  |
| 70,00 | 2,00 | 2,00 | 2,00 | 1,00 | 1,00 | 2,00 | #NULL! | #NULL! |
| 49,00 | 1,00 | 1,00 | 2,00 | 2,00 | 1,00 | 1,00 | 20,00  | #NULL! |
| 46,00 | 2,00 | 2,00 | 2,00 | 2,00 | 2,00 | 2,00 | #NULL! | #NULL! |
| 48,00 | 1,00 | 1,00 | 2,00 | 2,00 | 2,00 | 1,00 | 20,00  | #NULL! |
| 50,00 | 1,00 | 2,00 | 2,00 | 1,00 | 1,00 | 2,00 | #NULL! | #NULL! |
| 85,00 | 2,00 | 1,00 | 2,00 | 2,00 | 1,00 | 2,00 | #NULL! | #NULL! |
| 70,00 | 1,00 | 1,00 | 2,00 | 2,00 | 2,00 | 2,00 | #NULL! | #NULL! |
| 57,00 | 1,00 | 2,00 | 2,00 | 2,00 | 2,00 | 2,00 | 20,00  | 20,00  |
| 53,00 | 2,00 | 2,00 | 2,00 | 2,00 | 2,00 | 2,00 | #NULL! | #NULL! |
| 76,00 | 2,00 | 1,00 | 1,00 | 2,00 | 1,00 | 2,00 | #NULL! | #NULL! |
| 78,00 | 1,00 | 1,00 | 2,00 | 1,00 | 1,00 | 2,00 | #NULL! | #NULL! |
| 66,00 | 2,00 | 1,00 | 2,00 | 2,00 | 2,00 | 2,00 | #NULL! | #NULL! |
| 69,00 | 1,00 | 1,00 | 1,00 | 1,00 | 1,00 | 1,00 | 60,00  | #NULL! |
| 48,00 | 2,00 | 2,00 | 2,00 | 2,00 | 2,00 | 2,00 | #NULL! | #NULL! |
| 57,00 | 1,00 | 1,00 | 2,00 | 2,00 | 2,00 | 2,00 | #NULL! | #NULL! |
| 59,00 | 2,00 | 2,00 | 2,00 | 2,00 | 2,00 | 2,00 | #NULL! | #NULL! |
| 62,00 | 1,00 | 2,00 | 2,00 | 2,00 | 2,00 | 2,00 | #NULL! | #NULL! |
| 48,00 | 2,00 | 2,00 | 1,00 | 2,00 | 2,00 | 2,00 | #NULL! | #NULL! |
| 55,00 | 1,00 | 1,00 | 2,00 | 2,00 | 1,00 | 2,00 | #NULL! | #NULL! |
| 58,00 | 1,00 | 2,00 | 2,00 | 2,00 | 2,00 | 2,00 | #NULL! | #NULL! |
| 60,00 | 2,00 | 2,00 | 2,00 | 2,00 | 2,00 | 2,00 | #NULL! | #NULL! |
| 58,00 | 2,00 | 1,00 | 1,00 | 1,00 | 2,00 | 2,00 | #NULL! | #NULL! |
| 48,00 | 2,00 | 2,00 | 2,00 | 2,00 | 2,00 | 2,00 | #NULL! | #NULL! |
| 62,00 | 2,00 | 1,00 | 2,00 | 2,00 | 2,00 | 2,00 | #NULL! | #NULL! |
| 65,00 | 2,00 | 1,00 | 2,00 | 2,00 | 1,00 | 2,00 | #NULL! | #NULL! |
| 56,00 | 2,00 | 2,00 | 1,00 | 2,00 | 2,00 | 1,00 | 30,00  | #NULL! |
| 62,00 | 1,00 | 2,00 | 1,00 | 2,00 | 2,00 | 2,00 | #NULL! | #NULL! |
| 57,00 | 1,00 | 1,00 | 2,00 | 2,00 | 2,00 | 1,00 | 37,00  | #NULL! |
| 68,00 | 2,00 | 1,00 | 2,00 | 2,00 | 2,00 | 2,00 | #NULL! | #NULL! |
| 45,00 | 1,00 | 1,00 | 2,00 | 1,00 | 2,00 | 2,00 | #NULL! | #NULL! |
| 76,00 | 1,00 | 1,00 | 1,00 | 2,00 | 2,00 | 2,00 | #NULL! | #NULL! |
| 52,00 | 1,00 | 1,00 | 2,00 | 1,00 | 2,00 | 1,00 | 15,00  | #NULL! |
| 45,00 | 2,00 | 2,00 | 2,00 | 2,00 | 2,00 | 2,00 | #NULL! | #NULL! |
| 62,00 | 2,00 | 1,00 | 2,00 | 1,00 | 1,00 | 2,00 | #NULL! | #NULL! |
| 49,00 | 2,00 | 2,00 | 1,00 | 2,00 | 1,00 | 2,00 | #NULL! | #NULL! |
| 68,00 | 2,00 | 1,00 | 2,00 | 1,00 | 1,00 | 2,00 | #NULL! | #NULL! |
| 71,00 | 1,00 | 1,00 | 2,00 | 2,00 | 2,00 | 2,00 | #NULL! | #NULL! |
| 52,00 | 2,00 | 1,00 | 2,00 | 2,00 | 2,00 | 2,00 | #NULL! | #NULL! |
| 53,00 | 1,00 | 2,00 | 2,00 | 2,00 | 2,00 | 2,00 | #NULL! | #NULL! |
| 56,00 | 1,00 | 1,00 | 1,00 | 2,00 | 2,00 | 1,00 | 20,00  | #NULL! |
| 52,00 | 2,00 | 2,00 | 2,00 | 2,00 | 2,00 | 2,00 | #NULL! | #NULL! |
| 51,00 | 2,00 | 1,00 | 2,00 | 2,00 | 1,00 | 2,00 | #NULL! | #NULL! |
| 55,00 | 1,00 | 2,00 | 2,00 | 2,00 | 2,00 | 1,00 | 20,00  | #NULL! |
| 65,00 | 2,00 | 1,00 | 1,00 | 1,00 | 1,00 | 2,00 | #NULL! | #NULL! |

|       |      |      |      |      |      |      |        |        |
|-------|------|------|------|------|------|------|--------|--------|
| 48,00 | 2,00 | 1,00 | 1,00 | 2,00 | 2,00 | 1,00 | #NULL! | #NULL! |
| 55,00 | 1,00 | 1,00 | 2,00 | 2,00 | 2,00 | 1,00 | 30,00  | #NULL! |
| 56,00 | 2,00 | 1,00 | 2,00 | 1,00 | 1,00 | 2,00 | #NULL! | #NULL! |
| 50,00 | 2,00 | 1,00 | 2,00 | 1,00 | 2,00 | 2,00 | #NULL! | #NULL! |
| 57,00 | 2,00 | 2,00 | 2,00 | 2,00 | 2,00 | 1,00 | 15,00  | #NULL! |
| 60,00 | 2,00 | 2,00 | 2,00 | 2,00 | 2,00 | 2,00 | #NULL! | #NULL! |
| 58,00 | 2,00 | 2,00 | 1,00 | 2,00 | 2,00 | 2,00 | #NULL! | #NULL! |
| 64,00 | 1,00 | 2,00 | 2,00 | 2,00 | 2,00 | 1,00 | 30,00  | #NULL! |
| 58,00 | 2,00 | 2,00 | 2,00 | 2,00 | 2,00 | 2,00 | #NULL! | #NULL! |
| 63,00 | 1,00 | 1,00 | 1,00 | 1,00 | 1,00 | 2,00 | #NULL! | #NULL! |
| 80,00 | 2,00 | 1,00 | 1,00 | 1,00 | 2,00 | 2,00 | #NULL! | #NULL! |
| 54,00 | 2,00 | 2,00 | 2,00 | 2,00 | 2,00 | 2,00 | #NULL! | #NULL! |
| 59,00 | 1,00 | 2,00 | 2,00 | 2,00 | 2,00 | 2,00 | #NULL! | #NULL! |
| 51,00 | 1,00 | 2,00 | 2,00 | 2,00 | 2,00 | 2,00 | #NULL! | #NULL! |
| 64,00 | 1,00 | 2,00 | 2,00 | 2,00 | 2,00 | 2,00 | #NULL! | #NULL! |
| 64,00 | 1,00 | 1,00 | 2,00 | 2,00 | 2,00 | 1,00 | 40,00  | #NULL! |
| 59,00 | 1,00 | 1,00 | 2,00 | 1,00 | 2,00 | 1,00 | 15,00  | #NULL! |
| 56,00 | 2,00 | 2,00 | 2,00 | 2,00 | 2,00 | 2,00 | #NULL! | #NULL! |
| 59,00 | 1,00 | 2,00 | 2,00 | 2,00 | 2,00 | 2,00 | #NULL! | #NULL! |
| 45,00 | 2,00 | 2,00 | 2,00 | 2,00 | 2,00 | 2,00 | #NULL! | #NULL! |
| 46,00 | 1,00 | 2,00 | 2,00 | 2,00 | 2,00 | 2,00 | #NULL! | #NULL! |
| 51,00 | 1,00 | 2,00 | 2,00 | 2,00 | 2,00 | 2,00 | #NULL! | #NULL! |
| 55,00 | 1,00 | 2,00 | 2,00 | 2,00 | 2,00 | 2,00 | #NULL! | #NULL! |
| 47,00 | 2,00 | 1,00 | 2,00 | 2,00 | 2,00 | 2,00 | #NULL! | #NULL! |
| 51,00 | 2,00 | 2,00 | 2,00 | 2,00 | 2,00 | 2,00 | #NULL! | #NULL! |
| 47,00 | 2,00 | 2,00 | 2,00 | 2,00 | 2,00 | 1,00 | 30,00  | #NULL! |
| 45,00 | 2,00 | 2,00 | 2,00 | 2,00 | 2,00 | 2,00 | #NULL! | #NULL! |
| 53,00 | 2,00 | 2,00 | 2,00 | 2,00 | 2,00 | 2,00 | #NULL! | #NULL! |
| 56,00 | 2,00 | 2,00 | 2,00 | 2,00 | 2,00 | 1,00 | 28,00  | #NULL! |
| 51,00 | 2,00 | 2,00 | 2,00 | 2,00 | 2,00 | 2,00 | #NULL! | #NULL! |
| 56,00 | 1,00 | 2,00 | 2,00 | 1,00 | 2,00 | 2,00 | #NULL! | #NULL! |
| 80,00 | 2,00 | 1,00 | 1,00 | 1,00 | 1,00 | 2,00 | #NULL! | #NULL! |
| 51,00 | 2,00 | 2,00 | 2,00 | 2,00 | 2,00 | 2,00 | #NULL! | #NULL! |
| 55,00 | 1,00 | 1,00 | 2,00 | 2,00 | 2,00 | 2,00 | #NULL! | #NULL! |
| 50,00 | 2,00 | 2,00 | 1,00 | 2,00 | 2,00 | 2,00 | #NULL! | #NULL! |
| 51,00 | 1,00 | 2,00 | 2,00 | 2,00 | 1,00 | 1,00 | 26,00  | #NULL! |
| 47,00 | 2,00 | 1,00 | 2,00 | 1,00 | 1,00 | 1,00 | 20,00  | #NULL! |
| 50,00 | 1,00 | 1,00 | 1,00 | 1,00 | 1,00 | 1,00 | 80,00  | #NULL! |
| 46,00 | 2,00 | 2,00 | 2,00 | 2,00 | 2,00 | 2,00 | #NULL! | #NULL! |
| 61,00 | 1,00 | 2,00 | 1,00 | 1,00 | 1,00 | 2,00 | #NULL! | #NULL! |
| 46,00 | 2,00 | 1,00 | 2,00 | 2,00 | 2,00 | 2,00 | #NULL! | #NULL! |
| 60,00 | 2,00 | 1,00 | 1,00 | 2,00 | 2,00 | 2,00 | #NULL! | #NULL! |
| 50,00 | 1,00 | 2,00 | 1,00 | 2,00 | 1,00 | 2,00 | #NULL! | #NULL! |
| 66,00 | 1,00 | 2,00 | 2,00 | 1,00 | 2,00 | 2,00 | #NULL! | #NULL! |
| 60,00 | 2,00 | 2,00 | 2,00 | 2,00 | 2,00 | 2,00 | #NULL! | #NULL! |
| 59,00 | 1,00 | 1,00 | 2,00 | 2,00 | 2,00 | 2,00 | #NULL! | #NULL! |
| 51,00 | 1,00 | 2,00 | 2,00 | 2,00 | 1,00 | 2,00 | #NULL! | #NULL! |
| 45,00 | 2,00 | 2,00 | 2,00 | 2,00 | 2,00 | 2,00 | #NULL! | #NULL! |
| 54,00 | 2,00 | 2,00 | 2,00 | 2,00 | 2,00 | 2,00 | #NULL! | #NULL! |
| 76,00 | 2,00 | 2,00 | 2,00 | 2,00 | 1,00 | 2,00 | #NULL! | #NULL! |



|       |      |      |      |      |      |      |        |        |
|-------|------|------|------|------|------|------|--------|--------|
| 45,00 | 2,00 | 2,00 | 2,00 | 2,00 | 2,00 | 2,00 | #NULL! | #NULL! |
| 55,00 | 2,00 | 2,00 | 2,00 | 2,00 | 2,00 | 2,00 | #NULL! | #NULL! |
| 59,00 | 2,00 | 2,00 | 2,00 | 2,00 | 2,00 | 2,00 | #NULL! | #NULL! |
| 46,00 | 1,00 | 2,00 | 2,00 | 2,00 | 2,00 | 2,00 | #NULL! | #NULL! |
| 49,00 | 1,00 | 2,00 | 2,00 | 2,00 | 2,00 | 2,00 | #NULL! | #NULL! |
| 69,00 | 1,00 | 1,00 | 2,00 | 1,00 | 2,00 | 1,00 | 32,00  | #NULL! |
| 67,00 | 2,00 | 1,00 | 2,00 | 2,00 | 2,00 | 1,00 | 25,00  | #NULL! |
| 46,00 | 2,00 | 2,00 | 2,00 | 2,00 | 2,00 | 2,00 | #NULL! | #NULL! |
| 50,00 | 1,00 | 1,00 | 2,00 | 2,00 | 2,00 | 2,00 | #NULL! | #NULL! |
| 62,00 | 2,00 | 1,00 | 1,00 | 1,00 | 1,00 | 1,00 | 20,00  | #NULL! |
| 60,00 | 2,00 | 1,00 | 2,00 | 2,00 | 2,00 | 1,00 | 10,00  | #NULL! |
| 52,00 | 2,00 | 1,00 | 2,00 | 1,00 | 2,00 | 2,00 | #NULL! | #NULL! |
| 56,00 | 2,00 | 1,00 | 2,00 | 2,00 | 2,00 | 2,00 | #NULL! | #NULL! |
| 59,00 | 2,00 | 1,00 | 2,00 | 1,00 | 2,00 | 2,00 | #NULL! | #NULL! |
| 60,00 | 1,00 | 2,00 | 1,00 | 2,00 | 1,00 | 1,00 | 40,00  | #NULL! |
| 60,00 | 2,00 | 1,00 | 2,00 | 2,00 | 2,00 | 2,00 | #NULL! | #NULL! |
| 62,00 | 1,00 | 1,00 | 2,00 | 2,00 | 2,00 | 2,00 | #NULL! | #NULL! |
| 46,00 | 2,00 | 1,00 | 1,00 | 2,00 | 2,00 | 2,00 | #NULL! | #NULL! |
| 49,00 | 1,00 | 1,00 | 2,00 | 1,00 | 1,00 | 1,00 | 30,00  | #NULL! |
| 46,00 | 2,00 | 1,00 | 2,00 | 2,00 | 1,00 | 2,00 | #NULL! | #NULL! |
| 49,00 | 2,00 | 1,00 | 1,00 | 2,00 | 2,00 | 2,00 | #NULL! | #NULL! |
| 59,00 | 1,00 | 2,00 | 2,00 | 2,00 | 2,00 | 2,00 | #NULL! | #NULL! |
| 58,00 | 2,00 | 2,00 | 2,00 | 1,00 | 1,00 | 2,00 | #NULL! | #NULL! |
| 46,00 | 1,00 | 1,00 | 2,00 | 2,00 | 2,00 | 2,00 | #NULL! | #NULL! |
| 47,00 | 2,00 | 1,00 | 2,00 | 2,00 | 2,00 | 2,00 | #NULL! | #NULL! |
| 52,00 | 1,00 | 1,00 | 2,00 | 2,00 | 2,00 | 2,00 | #NULL! | #NULL! |
| 50,00 | 2,00 | 2,00 | 2,00 | 2,00 | 2,00 | 2,00 | #NULL! | #NULL! |
| 55,00 | 1,00 | 1,00 | 2,00 | 2,00 | 2,00 | 2,00 | #NULL! | #NULL! |
| 57,00 | 1,00 | 2,00 | 1,00 | 2,00 | 2,00 | 2,00 | #NULL! | #NULL! |
| 49,00 | 2,00 | 2,00 | 2,00 | 2,00 | 2,00 | 2,00 | #NULL! | #NULL! |
| 48,00 | 2,00 | 2,00 | 2,00 | 2,00 | 2,00 | 2,00 | #NULL! | #NULL! |
| 46,00 | 2,00 | 2,00 | 2,00 | 2,00 | 2,00 | 2,00 | #NULL! | #NULL! |
| 55,00 | 1,00 | 1,00 | 2,00 | 1,00 | 2,00 | 2,00 | #NULL! | #NULL! |
| 46,00 | 2,00 | 2,00 | 2,00 | 2,00 | 2,00 | 2,00 | #NULL! | #NULL! |
| 46,00 | 1,00 | 2,00 | 2,00 | 2,00 | 2,00 | 2,00 | #NULL! | #NULL! |
| 58,00 | 2,00 | 1,00 | 2,00 | 1,00 | 1,00 | 1,00 | 30,00  | #NULL! |
| 61,00 | 2,00 | 1,00 | 1,00 | 2,00 | 2,00 | 2,00 | #NULL! | #NULL! |
| 51,00 | 2,00 | 2,00 | 2,00 | 2,00 | 2,00 | 2,00 | #NULL! | #NULL! |
| 58,00 | 1,00 | 1,00 | 2,00 | 1,00 | 1,00 | 1,00 | 15,00  | #NULL! |
| 52,00 | 2,00 | 1,00 | 2,00 | 1,00 | 2,00 | 2,00 | #NULL! | #NULL! |
| 59,00 | 1,00 | 2,00 | 1,00 | 1,00 | 2,00 | 1,00 | 40,00  | #NULL! |
| 66,00 | 2,00 | 1,00 | 2,00 | 2,00 | 2,00 | 2,00 | #NULL! | #NULL! |
| 70,00 | 1,00 | 1,00 | 2,00 | 1,00 | 1,00 | 2,00 | #NULL! | #NULL! |
| 62,00 | 2,00 | 2,00 | 2,00 | 2,00 | 2,00 | 2,00 | #NULL! | #NULL! |
| 63,00 | 1,00 | 2,00 | 2,00 | 2,00 | 2,00 | 1,00 | 40,00  | #NULL! |
| 76,00 | 1,00 | 2,00 | 2,00 | 1,00 | 1,00 | 1,00 | 40,00  | #NULL! |
| 74,00 | 2,00 | 1,00 | 2,00 | 2,00 | 2,00 | 2,00 | #NULL! | #NULL! |
| 70,00 | 2,00 | 1,00 | 2,00 | 1,00 | 2,00 | 1,00 | 10,00  | #NULL! |
| 76,00 | 2,00 | 1,00 | 1,00 | 2,00 | 2,00 | 1,00 | 20,00  | #NULL! |
| 78,00 | 2,00 | 1,00 | 2,00 | 1,00 | 2,00 | 2,00 | #NULL! | #NULL! |



|       |      |      |       |      |      |      |        |        |
|-------|------|------|-------|------|------|------|--------|--------|
| 80,00 | 1,00 | 2,00 | 2,00  | 1,00 | 1,00 | 2,00 | #NULL! | #NULL! |
| 62,00 | 2,00 | 1,00 | 1,00  | 2,00 | 2,00 | 2,00 | #NULL! | #NULL! |
| 69,00 | 1,00 | 2,00 | 1,00  | 2,00 | 1,00 | 2,00 | #NULL! | #NULL! |
| 46,00 | 2,00 | 2,00 | 2,00  | 2,00 | 2,00 | 2,00 | #NULL! | #NULL! |
| 49,00 | 1,00 | 2,00 | 2,00  | 2,00 | 2,00 | 2,00 | #NULL! | #NULL! |
| 46,00 | 2,00 | 2,00 | 2,00  | 2,00 | 2,00 | 2,00 | #NULL! | #NULL! |
| 50,00 | 1,00 | 1,00 | 2,00  | 2,00 | 2,00 | 2,00 | #NULL! | #NULL! |
| 63,00 | 1,00 | 1,00 | 2,00  | 2,00 | 2,00 | 2,00 | #NULL! | #NULL! |
| 59,00 | 2,00 | 1,00 | 2,00  | 2,00 | 2,00 | 2,00 | #NULL! | #NULL! |
| 55,00 | 1,00 | 2,00 | 2,00  | 2,00 | 2,00 | 2,00 | #NULL! | #NULL! |
| 59,00 | 2,00 | 1,00 | 2,00  | 1,00 | 1,00 | 2,00 | #NULL! | #NULL! |
| 54,00 | 2,00 | 1,00 | 2,00  | 2,00 | 2,00 | 2,00 | #NULL! | #NULL! |
| 60,00 | 1,00 | 1,00 | 1,00  | 2,00 | 2,00 | 2,00 | #NULL! | #NULL! |
| 65,00 | 1,00 | 1,00 | 2,00  | 2,00 | 2,00 | 1,00 | 20,00  | #NULL! |
| 60,00 | 2,00 | 2,00 | 2,00  | 2,00 | 2,00 | 1,00 | 15,00  | #NULL! |
| 45,00 | 2,00 | 2,00 | 2,00  | 2,00 | 2,00 | 2,00 | #NULL! | #NULL! |
| 46,00 | 1,00 | 2,00 | 2,00  | 2,00 | 2,00 | 2,00 | #NULL! | #NULL! |
| 59,00 | 2,00 | 2,00 | 2,00  | 2,00 | 2,00 | 1,00 | 40,00  | #NULL! |
| 61,00 | 1,00 | 1,00 | 2,00  | 1,00 | 1,00 | 2,00 | #NULL! | #NULL! |
| 65,00 | 2,00 | 1,00 | 2,00  | 2,00 | 2,00 | 2,00 | #NULL! | #NULL! |
| 58,00 | 2,00 | 1,00 | 1,00  | 2,00 | 1,00 | 2,00 | #NULL! | #NULL! |
| 58,00 | 2,00 | 1,00 | 2,00  | 2,00 | 2,00 | 2,00 | #NULL! | #NULL! |
| 60,00 | 2,00 | 1,00 | 2,00  | 2,00 | 2,00 | 2,00 | #NULL! | #NULL! |
| 46,00 | 1,00 | 2,00 | 2,00  | 2,00 | 2,00 | 2,00 | #NULL! | #NULL! |
| 45,00 | 2,00 | 2,00 | 2,00  | 2,00 | 2,00 | 2,00 | #NULL! | #NULL! |
| 71,00 | 1,00 | 1,00 | 2,00  | 2,00 | 2,00 | 2,00 | 60,00  | 4,00   |
| 69,00 | 2,00 | 1,00 | 2,00  | 2,00 | 2,00 | 2,00 | #NULL! | #NULL! |
| 70,00 | 2,00 | 1,00 | 2,00  | 2,00 | 2,00 | 2,00 | #NULL! | #NULL! |
| 50,00 | 2,00 | 2,00 | 2,00  | 2,00 | 2,00 | 2,00 | #NULL! | #NULL! |
| 54,00 | 1,00 | 1,00 | 1,00  | 2,00 | 1,00 | 1,00 | 35,00  | #NULL! |
| 51,00 | 2,00 | 1,00 | 1,00  | 2,00 | 2,00 | 2,00 | #NULL! | #NULL! |
| 55,00 | 2,00 | 2,00 | 2,00  | 2,00 | 1,00 | 2,00 | #NULL! | #NULL! |
| 58,00 | 1,00 | 2,00 | 2,00  | 2,00 | 1,00 | 2,00 | #NULL! | #NULL! |
| 52,00 | 1,00 | 2,00 | 2,00  | 2,00 | 2,00 | 1,00 | 12,00  | #NULL! |
| 50,00 | 2,00 | 2,00 | 2,00  | 2,00 | 2,00 | 2,00 | #NULL! | #NULL! |
| 45,00 | 1,00 | 2,00 | 2,00  | 2,00 | 2,00 | 1,00 | 30,00  | #NULL! |
| 47,00 | 1,00 | 2,00 | 2,00  | 2,00 | 1,00 | 2,00 | #NULL! | #NULL! |
| 53,00 | 2,00 | 2,00 | 1,00  | 2,00 | 1,00 | 2,00 | #NULL! | #NULL! |
| 45,00 | 2,00 | 2,00 | 21,00 | 2,00 | 2,00 | 2,00 | #NULL! | #NULL! |
| 55,00 | 1,00 | 2,00 | 2,00  | 2,00 | 2,00 | 1,00 | 60,00  | #NULL! |
| 48,00 | 1,00 | 2,00 | 2,00  | 2,00 | 2,00 | 2,00 | #NULL! | #NULL! |
| 46,00 | 2,00 | 2,00 | 2,00  | 2,00 | 2,00 | 1,00 | 30,00  | #NULL! |
| 74,00 | 2,00 | 1,00 | 2,00  | 2,00 | 2,00 | 2,00 | #NULL! | #NULL! |
| 48,00 | 2,00 | 2,00 | 1,00  | 2,00 | 2,00 | 2,00 | #NULL! | #NULL! |
| 49,00 | 1,00 | 2,00 | 2,00  | 2,00 | 2,00 | 2,00 | #NULL! | #NULL! |
| 48,00 | 2,00 | 2,00 | 2,00  | 2,00 | 2,00 | 2,00 | #NULL! | #NULL! |
| 54,00 | 2,00 | 1,00 | 1,00  | 1,00 | 1,00 | 2,00 | #NULL! | #NULL! |
| 65,00 | 2,00 | 2,00 | 2,00  | 2,00 | 2,00 | 2,00 | #NULL! | #NULL! |
| 70,00 | 1,00 | 1,00 | 2,00  | 1,00 | 2,00 | 2,00 | #NULL! | #NULL! |
| 58,00 | 2,00 | 2,00 | 2,00  | 2,00 | 1,00 | 2,00 | #NULL! | #NULL! |

|       |      |      |      |      |      |      |        |        |
|-------|------|------|------|------|------|------|--------|--------|
| 58,00 | 1,00 | 2,00 | 2,00 | 1,00 | 1,00 | 2,00 | #NULL! | #NULL! |
| 51,00 | 2,00 | 2,00 | 2,00 | 2,00 | 2,00 | 2,00 | #NULL! | #NULL! |
| 62,00 | 2,00 | 1,00 | 2,00 | 2,00 | 2,00 | 2,00 | #NULL! | #NULL! |
| 52,00 | 2,00 | 1,00 | 2,00 | 1,00 | 1,00 | 2,00 | #NULL! | #NULL! |
| 46,00 | 2,00 | 2,00 | 2,00 | 2,00 | 2,00 | 2,00 | #NULL! | #NULL! |
| 48,00 | 2,00 | 2,00 | 2,00 | 2,00 | 2,00 | 1,00 | 40,00  | #NULL! |
| 60,00 | 1,00 | 1,00 | 2,00 | 2,00 | 2,00 | 2,00 | #NULL! | #NULL! |
| 80,00 | 2,00 | 1,00 | 1,00 | 1,00 | 1,00 | 2,00 | #NULL! | #NULL! |
| 50,00 | 2,00 | 2,00 | 2,00 | 2,00 | 2,00 | 1,00 | 20,00  | #NULL! |
| 73,00 | 2,00 | 1,00 | 1,00 | 2,00 | 2,00 | 2,00 | #NULL! | #NULL! |
| 40,00 | 2,00 | 2,00 | 2,00 | 2,00 | 2,00 | 2,00 | #NULL! | #NULL! |
| 55,00 | 2,00 | 2,00 | 2,00 | 2,00 | 2,00 | 2,00 | #NULL! | #NULL! |
| 60,00 | 1,00 | 2,00 | 2,00 | 2,00 | 2,00 | 2,00 | #NULL! | #NULL! |
| 50,00 | 2,00 | 1,00 | 2,00 | 1,00 | 2,00 | 1,00 | 10,00  | #NULL! |
| 50,00 | 2,00 | 1,00 | 2,00 | 2,00 | 2,00 | 1,00 | 15,00  | #NULL! |
| 45,00 | 2,00 | 2,00 | 2,00 | 2,00 | 2,00 | 2,00 | #NULL! | #NULL! |
| 62,00 | 2,00 | 1,00 | 2,00 | 2,00 | 2,00 | 2,00 | #NULL! | #NULL! |
| 45,00 | 2,00 | 2,00 | 2,00 | 2,00 | 2,00 | 2,00 | #NULL! | #NULL! |
| 53,00 | 1,00 | 2,00 | 1,00 | 2,00 | 2,00 | 2,00 | #NULL! | #NULL! |
| 72,00 | 1,00 | 1,00 | 2,00 | 1,00 | 2,00 | 2,00 | #NULL! | #NULL! |
| 52,00 | 2,00 | 1,00 | 2,00 | 2,00 | 1,00 | 2,00 | #NULL! | #NULL! |
| 81,00 | 1,00 | 1,00 | 1,00 | 2,00 | 2,00 | 2,00 | #NULL! | #NULL! |
| 75,00 | 2,00 | 1,00 | 1,00 | 1,00 | 1,00 | 2,00 | #NULL! | #NULL! |
| 57,00 | 1,00 | 2,00 | 2,00 | 2,00 | 2,00 | 2,00 | #NULL! | #NULL! |
| 80,00 | 2,00 | 1,00 | 2,00 | 2,00 | 2,00 | 2,00 | #NULL! | #NULL! |
| 47,00 | 1,00 | 2,00 | 2,00 | 2,00 | 2,00 | 1,00 | 30,00  | #NULL! |
| 71,00 | 2,00 | 1,00 | 2,00 | 1,00 | 2,00 | 2,00 | #NULL! | #NULL! |
| 48,00 | 2,00 | 2,00 | 2,00 | 2,00 | 2,00 | 1,00 | 20,00  | #NULL! |
| 45,00 | 2,00 | 2,00 | 2,00 | 2,00 | 2,00 | 2,00 | #NULL! | #NULL! |
| 50,00 | 2,00 | 2,00 | 1,00 | 2,00 | 2,00 | 2,00 | #NULL! | #NULL! |
| 45,00 | 2,00 | 1,00 | 2,00 | 1,00 | 2,00 | 2,00 | #NULL! | #NULL! |
| 47,00 | 2,00 | 2,00 | 2,00 | 2,00 | 2,00 | 2,00 | #NULL! | #NULL! |
| 55,00 | 1,00 | 1,00 | 2,00 | 2,00 | 1,00 | 2,00 | #NULL! | #NULL! |
| 58,00 | 1,00 | 2,00 | 2,00 | 2,00 | 2,00 | 2,00 | #NULL! | #NULL! |
| 82,00 | 2,00 | 1,00 | 2,00 | 1,00 | 2,00 | 2,00 | #NULL! | #NULL! |
| 70,00 | 1,00 | 1,00 | 2,00 | 2,00 | 2,00 | 2,00 | #NULL! | #NULL! |
| 54,00 | 2,00 | 1,00 | 2,00 | 2,00 | 2,00 | 1,00 | 20,00  | #NULL! |
| 65,00 | 1,00 | 1,00 | 2,00 | 2,00 | 2,00 | 1,00 | 40,00  | #NULL! |
| 56,00 | 2,00 | 2,00 | 1,00 | 2,00 | 2,00 | 2,00 | #NULL! | #NULL! |
| 50,00 | 2,00 | 2,00 | 2,00 | 1,00 | 1,00 | 2,00 | #NULL! | #NULL! |
| 79,00 | 2,00 | 1,00 | 2,00 | 2,00 | 2,00 | 2,00 | #NULL! | #NULL! |
| 76,00 | 1,00 | 2,00 | 2,00 | 2,00 | 2,00 | 2,00 | #NULL! | #NULL! |
| 69,00 | 2,00 | 1,00 | 2,00 | 2,00 | 1,00 | 2,00 | #NULL! | #NULL! |
| 70,00 | 1,00 | 1,00 | 2,00 | 2,00 | 2,00 | 2,00 | #NULL! | #NULL! |
| 65,00 | 2,00 | 2,00 | 2,00 | 2,00 | 2,00 | 2,00 | #NULL! | #NULL! |
| 52,00 | 2,00 | 1,00 | 2,00 | 1,00 | 1,00 | 2,00 | #NULL! | #NULL! |
| 51,00 | 2,00 | 2,00 | 2,00 | 2,00 | 2,00 | 2,00 | #NULL! | #NULL! |
| 52,00 | 2,00 | 2,00 | 2,00 | 2,00 | 2,00 | 1,00 | 30,00  | #NULL! |
| 60,00 | 2,00 | 1,00 | 1,00 | 1,00 | 1,00 | 2,00 | #NULL! | #NULL! |
| 72,00 | 2,00 | 1,00 | 2,00 | 2,00 | 2,00 | 2,00 | #NULL! | #NULL! |

|       |      |      |      |      |      |      |        |        |
|-------|------|------|------|------|------|------|--------|--------|
| 80,00 | 1,00 | 1,00 | 1,00 | 2,00 | 1,00 | 2,00 | #NULL! | #NULL! |
| 55,00 | 1,00 | 2,00 | 1,00 | 2,00 | 2,00 | 2,00 | #NULL! | #NULL! |
| 54,00 | 2,00 | 2,00 | 2,00 | 2,00 | 2,00 | 2,00 | #NULL! | #NULL! |
| 77,00 | 2,00 | 2,00 | 1,00 | 2,00 | 2,00 | 2,00 | #NULL! | #NULL! |
| 46,00 | 2,00 | 2,00 | 2,00 | 2,00 | 2,00 | 2,00 | #NULL! | #NULL! |
| 67,00 | 2,00 | 1,00 | 2,00 | 2,00 | 2,00 | 1,00 | 40,00  | #NULL! |
| 60,00 | 2,00 | 1,00 | 1,00 | 2,00 | 2,00 | 2,00 | #NULL! | #NULL! |
| 68,00 | 1,00 | 2,00 | 2,00 | 2,00 | 1,00 | 2,00 | #NULL! | #NULL! |
| 71,00 | 2,00 | 1,00 | 1,00 | 1,00 | 2,00 | 2,00 | #NULL! | #NULL! |
| 45,00 | 2,00 | 1,00 | 2,00 | 2,00 | 2,00 | 2,00 | #NULL! | #NULL! |
| 72,00 | 1,00 | 1,00 | 2,00 | 2,00 | 2,00 | 2,00 | #NULL! | #NULL! |
| 64,00 | 1,00 | 1,00 | 2,00 | 2,00 | 2,00 | 2,00 | #NULL! | #NULL! |
| 56,00 | 2,00 | 2,00 | 2,00 | 2,00 | 2,00 | 2,00 | #NULL! | #NULL! |
| 58,00 | 2,00 | 2,00 | 2,00 | 2,00 | 1,00 | 2,00 | #NULL! | #NULL! |
| 65,00 | 2,00 | 1,00 | 2,00 | 1,00 | 2,00 | 2,00 | #NULL! | #NULL! |
| 49,00 | 1,00 | 2,00 | 2,00 | 1,00 | 2,00 | 2,00 | #NULL! | #NULL! |
| 46,00 | 2,00 | 2,00 | 2,00 | 2,00 | 2,00 | 1,00 | 20,00  | #NULL! |
| 51,00 | 2,00 | 2,00 | 2,00 | 2,00 | 2,00 | 2,00 | #NULL! | #NULL! |
| 67,00 | 2,00 | 2,00 | 1,00 | 1,00 | 2,00 | 2,00 | 20,00  | 2,00   |
| 62,00 | 2,00 | 1,00 | 2,00 | 2,00 | 2,00 | 2,00 | #NULL! | #NULL! |
| 65,00 | 2,00 | 2,00 | 2,00 | 1,00 | 2,00 | 2,00 | #NULL! | #NULL! |
| 54,00 | 2,00 | 2,00 | 2,00 | 2,00 | 2,00 | 2,00 | #NULL! | #NULL! |
| 81,00 | 2,00 | 1,00 | 2,00 | 1,00 | 1,00 | 2,00 | 30,00  | 5,00   |
| 50,00 | 1,00 | 2,00 | 2,00 | 2,00 | 2,00 | 2,00 | #NULL! | #NULL! |
| 82,00 | 2,00 | 2,00 | 2,00 | 2,00 | 2,00 | 2,00 | #NULL! | #NULL! |
| 59,00 | 1,00 | 1,00 | 2,00 | 1,00 | 2,00 | 2,00 | #NULL! | #NULL! |
| 48,00 | 1,00 | 2,00 | 2,00 | 2,00 | 2,00 | 1,00 | 20,00  | #NULL! |
| 49,00 | 2,00 | 1,00 | 2,00 | 2,00 | 2,00 | 1,00 | 30,00  | #NULL! |
| 48,00 | 2,00 | 2,00 | 2,00 | 2,00 | 2,00 | 2,00 | #NULL! | #NULL! |
| 66,00 | 1,00 | 1,00 | 2,00 | 1,00 | 1,00 | 1,00 | 92,00  | #NULL! |
| 60,00 | 2,00 | 1,00 | 2,00 | 2,00 | 2,00 | 1,00 | 20,00  | #NULL! |
| 89,00 | 1,00 | 1,00 | 2,00 | 2,00 | 2,00 | 2,00 | 30,00  | 39,00  |
| 85,00 | 2,00 | 1,00 | 1,00 | 2,00 | 2,00 | 2,00 | #NULL! | #NULL! |
| 57,00 | 2,00 | 1,00 | 2,00 | 1,00 | 2,00 | 2,00 | #NULL! | #NULL! |
| 60,00 | 1,00 | 1,00 | 1,00 | 1,00 | 1,00 | 1,00 | 80,00  | #NULL! |
| 46,00 | 2,00 | 2,00 | 2,00 | 2,00 | 2,00 | 2,00 | #NULL! | #NULL! |
| 49,00 | 2,00 | 2,00 | 2,00 | 2,00 | 2,00 | 2,00 | #NULL! | #NULL! |
| 47,00 | 1,00 | 2,00 | 2,00 | 1,00 | 2,00 | 2,00 | #NULL! | #NULL! |
| 61,00 | 2,00 | 1,00 | 1,00 | 1,00 | 1,00 | 2,00 | #NULL! | #NULL! |
| 64,00 | 1,00 | 1,00 | 1,00 | 1,00 | 1,00 | 2,00 | #NULL! | #NULL! |
| 70,00 | 2,00 | 1,00 | 2,00 | 2,00 | 2,00 | 2,00 | #NULL! | #NULL! |
| 58,00 | 2,00 | 2,00 | 2,00 | 2,00 | 2,00 | 1,00 | 120,00 | #NULL! |
| 60,00 | 2,00 | 1,00 | 2,00 | 2,00 | 2,00 | 2,00 | #NULL! | #NULL! |
| 50,00 | 1,00 | 2,00 | 2,00 | 2,00 | 2,00 | 2,00 | #NULL! | #NULL! |
| 70,00 | 2,00 | 1,00 | 1,00 | 1,00 | 2,00 | 2,00 | #NULL! | #NULL! |
| 69,00 | 1,00 | 1,00 | 2,00 | 2,00 | 2,00 | 2,00 | #NULL! | #NULL! |
| 62,00 | 2,00 | 1,00 | 1,00 | 2,00 | 1,00 | 2,00 | #NULL! | #NULL! |
| 58,00 | 1,00 | 2,00 | 2,00 | 2,00 | 2,00 | 1,00 | 20,00  | #NULL! |
| 53,00 | 2,00 | 1,00 | 1,00 | 2,00 | 2,00 | 2,00 | #NULL! | #NULL! |
| 71,00 | 1,00 | 1,00 | 1,00 | 2,00 | 1,00 | 1,00 | 50,00  | #NULL! |











































































































































































2,00 2,00 #NULL! #NULL! #NULL! #NULL! #NULL!
